# Supplementary material for: One-pot reductive amination of carbonyl compounds and nitro compounds via Ir-catalyzed transfer hydrogenation
Source: Royal Society of Chemistry journal article supplement (doi:10.1039/d3ra05736d), 2023-01-01
Supplement: d3ra05736d1.pdf [file d3ra05736d1.pdf]

**One-Pot Reductive Amination of Carbonyl Compounds with Nitro Compounds  
via Ir-Catalyzed Transfer Hydrogenation**

Renshi Luo,<sup>a, b</sup> Jinghui Tong,<sup>b</sup> Lu Ouyang,<sup>b</sup> Liang Liu,<sup>b</sup> Jianhua Liao\*<sup>, b</sup>

<sup>a</sup> *College of Chemistry and Environmental Engineering, Shaoguan University,  
Shaoguan 512005, P. R. China.*

<sup>\*b</sup> *School of Pharmaceutical Sciences, Gannan Medical University, Ganzhou 341000,  
Jiangxi Province, P. R. China. Corresponding author: [liaojianhua@gmu.edu.cn](mailto:liaojianhua@gmu.edu.cn)*

**Supporting Information**

**Table of Contents**

|                                                                |     |
|----------------------------------------------------------------|-----|
| <b>A. General Information</b> .....                            | S2  |
| <b>B. General Procedure for Synthesis of compounds 3</b> ..... | S2  |
| <b>C. General Procedure for Synthesis of compounds 4</b> ..... | S2  |
| <b>D. Large scale synthesis of 4aa</b> .....                   | S3  |
| <b>E. Asymmetric synthesis of</b>                              |     |
| <b>4aa</b> .....                                               | S3  |
| <b>F. Control experiments</b> .....                            | S4  |
| <b>G. Analysis Data for the Products</b> .....                 | S4  |
| <b>H. References</b> .....                                     | S17 |
| <b>I. NMR Spectra</b> .....                                    | S18 |
| <b>J. HPLC Spectra</b> .....                                   | S69 |



## A. General Information

$^1\text{H}$  and  $^{13}\text{C}$  NMR spectra were recorded on a Bruker DRX-400 spectrometer (400 MHz for  $^1\text{H}$ ; 100 MHz for  $^{13}\text{C}$ ), using  $\text{CDCl}_3$  as solvent and TMS as an internal standard ( $\text{CDCl}_3$   $\delta_{\text{H}} = 7.26$  ppm, downfield from TMS,  $\delta_{\text{C}} = 77.16$  ppm). GC analyses were performed on a GC-7900 chromatograph with an FID and equipped with an AT.SE-30 capillary column (internal diameter: 0.32 mm, length: 30 mm). The materials used in the experiments were all purchased and without further purification. High-resolution mass spectra (HRMS) were recorded by a LCMS-IT-TOF mass spectrometer. Melting points were determined on a melting point instrument.

## B. General Procedure for preparation of 3 [1]

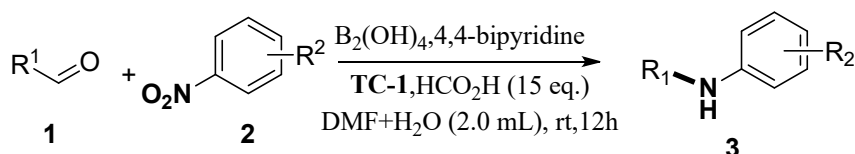

To a 25 mL dried Schlenk tube were added nitrobenzene (1.0 mmol),  $\text{B}_2(\text{OH})_4$  (3.0 mmol), and 4,4-bipyridine (0.05 mmol) and stirred in the DMF (1.0 mL) at room temperature for 5 minutes, then the aldehydes (0.5 mmol, 1.0 equiv.), Ir catalyst (1 mol %),  $\text{HCO}_2\text{H}$  (15.0 equiv.) and water (1.0 mL) were added successively. The mixture was stirred at room temperature for 12 h. After the completion of reaction, the mixture was diluted with  $\text{H}_2\text{O}$  (15.0 mL), neutralized with  $\text{NaHCO}_3$ , and extracted with EtOAc (10 mL x 3). The organic extract then was washed with brine (10 mL x 3) and dried over anhydrous  $\text{MgSO}_4$  and concentrated in vacuum, which was purified by flash column chromatography on silica gel to afford the desired product 3.

## C. General Procedure for preparation of 4 [1]

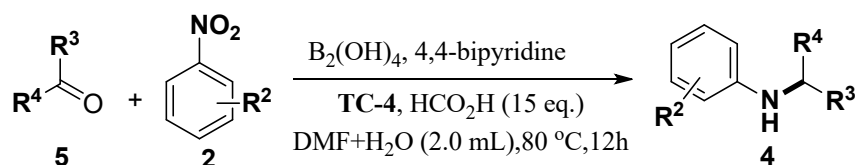

To a 25.0 mL dried Schlenk tube were added nitrobenzene (0.75 mmol),  $\text{B}_2(\text{OH})_4$  (2.25 mmol), and 4,4-bipyridine (0.0375 mmol) and stirred in the DMF (1.0 mL) at room temperature for 5.0 minutes, then the ketones (0.5 mmol, 1.0 equiv.), Ir catalyst (1.0 mol %),  $\text{HCO}_2\text{H}$  (15.0 equiv.) and water (1.0 mL) were added into the Schlenk

tube successively. The mixture was stirred at 80 °C for 12 h. After the completion of reaction, the mixture was diluted with H<sub>2</sub>O (15.0 mL), neutralized with NaHCO<sub>3</sub>, and extracted with EtOAc (10 mL x 3). The organic extract then was washed with brine (10 mL x 3) and dried over anhydrous MgSO<sub>4</sub> and concentrated in vacuum, which was purified by flash column chromatography on silica gel to afford the desired product **4**.

#### D. Large scale synthesis of **4aa**.<sup>[1]</sup>

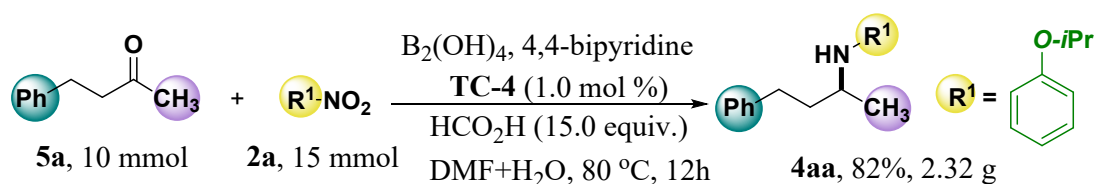

To a 100.0 mL dried Schlenk tube were added the mixture of **2a** (15 mmol, 1.5 equiv.), B<sub>2</sub>(OH)<sub>4</sub> (45.0 mmol), 4,4-bipyridine (0.5 mmol), and DMF (25.0 mL) and stirred for 5.0 min, after which the **5a** (10.0 mmol, 1.0 equiv.), Ir catalyst (0.1 mol %), HCO<sub>2</sub>H (15.0 equiv.) and water (25.0 mL) were added. The mixture was stirred at 80 °C for 12 h. After the completion of reaction, the mixture was diluted with H<sub>2</sub>O (50.0 mL), neutralized with NaHCO<sub>3</sub>, and extracted with EtOAc (20.0 mL x 3). The organic extract then was washed with brine (20.0 mL x 3) and dried over anhydrous MgSO<sub>4</sub> and concentrated in vacuum, which was purified by flash column chromatography (hexane/ethyl acetate = 30/1) on silica gel to afford the product of **4aa**.

#### E. Asymmetric synthesis of **4aa**.<sup>[1]</sup>

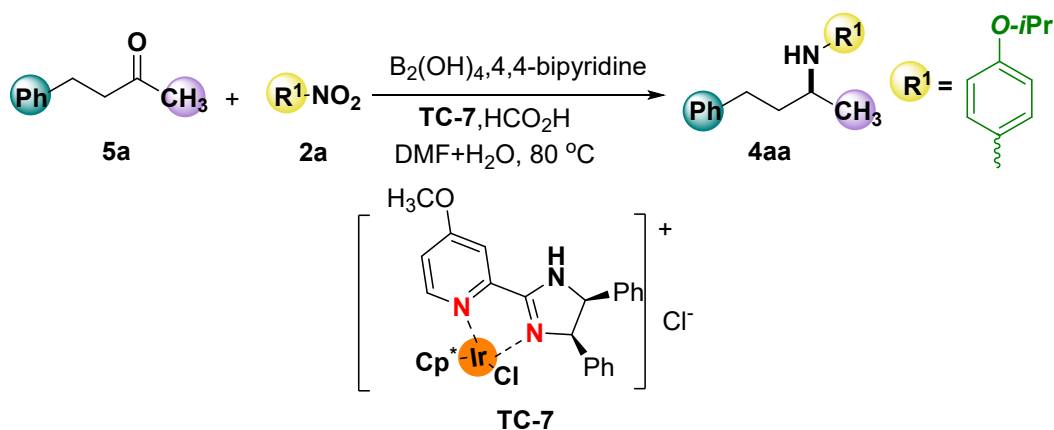

To a 25.0 mL dried Schlenk tube were added the mixture of **2a** (0.75 mmol, 1.5

equiv.), B<sub>2</sub>(OH)<sub>4</sub> (2.25 mmol), 4,4-bipyridine (0.025 mmol) and DMF (1.0 mL) and stirred for 5.0 min, after which the **5a** (0.5 mmol, 1.0 equiv.), **TC-7** (1.0 mol %), HCO<sub>2</sub>H (15.0 equiv.) and water (1.0 mL) were added. The mixture was stirred at 80 °C for 12 h. After the completion of reaction, the mixture was diluted with H<sub>2</sub>O (15.0 mL), neutralized with NaHCO<sub>3</sub>, and extracted with EtOAc (10.0 mL x 3). The organic extract then was washed with brine (10.0 mL x 3) and dried over anhydrous MgSO<sub>4</sub> and concentrated in vacuum. The residue was purified by chromatography on silica gel with (hexane/ethyl acetate = 30/1) as the eluent to afford the product of **4aa** in 83% yield. The enantiomeric excess was determined by HPLC using Daicel Chiralpak OD-H column, hexane/i-PrOH 85:15, flow rate 1.0 mL/min, UV detection at 220 nm, *t*<sub>minor</sub> = 7.511 min, *t*<sub>major</sub> = 7.881 min, 0% *ee*.

## F. Control experiment

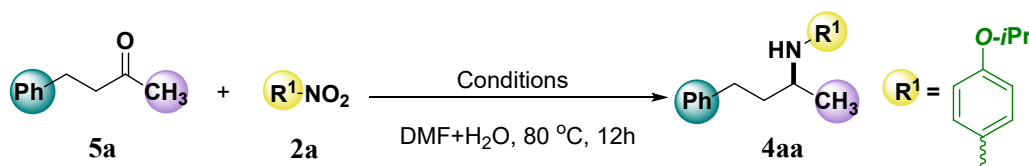

| Entry          | B <sub>2</sub> (OH) <sub>4</sub> | 4,4-Bipyridine | <b>TC-4</b> | HCO <sub>2</sub> H | yield <sup>b</sup> |
|----------------|----------------------------------|----------------|-------------|--------------------|--------------------|
| 1              | -                                | +              | +           | +                  | 30                 |
| 2              | +                                | -              | +           | +                  | n.d                |
| 3              | -                                | -              | +           | +                  | n.d                |
| 4              | -                                | +              | -           | +                  | n.d                |
| 5              | -                                | -              | +           | +                  | n.d                |
| 6 <sup>a</sup> | +                                | +              | +           | +                  | 97                 |
| 7              | +                                | +              | +           | -                  | n.d                |

<sup>[a]</sup> Reaction conditions: **5a** (0.5 mmol), **2a** (0.75 mmol), solvent (2.0 mL), catalyst (1.0% mol), hydrogen donor (15.0 equiv.), B<sub>2</sub>(OH)<sub>4</sub>(2.25 mmol), 4,4-bipyridine (0.0375 mmol) at 80 °C under air for 12h. <sup>[b]</sup> Determined by GC-MS.

## G. Analysis Data for the Products

### *N*-benzyl-4-isopropoxyaniline(**3aa**)

114.52 mg, 90% yield, brown oil. TLC (hexane/ethyl acetate = 30/1, v/v): R<sub>f</sub> = 0.26.

<sup>1</sup>H NMR (400 MHz, CDCl<sub>3</sub>) δ 7.36-7.29 (m, 4H), 7.27-7.23 (m, 1H), 6.76 (d, *J* = 8.3

Hz, 2H), 6.55 (d,  $J = 8.3$  Hz, 2H), 4.36-4.24 (m, 1H), 4.24 (s, 2H), 1.27 (d,  $J = 6.1$  Hz, 6H);  $^{13}\text{C}$  NMR (100 MHz,  $\text{CDCl}_3$ )  $\delta$  150.0, 142.5, 139.6, 128.5, 127.5, 127.1, 117.8, 113.9, 71.0, 49.1, 22.1. HRMS (ESI,  $m/z$ ):  $[\text{M}+\text{H}]^+$  Calcd. for  $\text{C}_{16}\text{H}_{19}\text{NO}$ , 242.1545; found, 242.1547.

#### **4-isopropoxy-*N*-(2-methylbenzyl)aniline (3ba)**

100.73 mg, 79% yield, brown oil. TLC (hexane/ethyl acetate = 30/1, v/v):  $R_f = 0.26$ .  $^1\text{H}$  NMR (400 MHz,  $\text{CDCl}_3$ )  $\delta$  7.32 (d,  $J = 6.4$  Hz, 1H), 7.18 (s, 3H), 6.78 (dd,  $J = 8.9$ , 2.3 Hz, 2H), 6.57 (dd,  $J = 8.7$ , 2.0 Hz, 2H), 4.39-4.32 (m, 1H), 4.20 (s, 2H), 2.35 (s, 3H), 1.28 (dd,  $J = 6.0$ , 2.3 Hz, 6H);  $^{13}\text{C}$  NMR (100 MHz,  $\text{CDCl}_3$ )  $\delta$  150.0, 142.8, 137.2, 136.3, 130.3, 128.2, 127.3, 126.0, 117.9, 113.7, 71.1, 47.1, 22.1, 18.9. HRMS (ESI,  $m/z$ ):  $[\text{M}+\text{H}]^+$  Calcd. for  $\text{C}_{17}\text{H}_{21}\text{NO}$ , 256.1701; found, 256.1690.

#### **4-isopropoxy-*N*-(4-methylbenzyl)aniline (3ca)**

87.98 mg, 69% yield, brown oil. TLC (hexane/ethyl acetate = 30/1, v/v):  $R_f = 0.26$ .  $^1\text{H}$  NMR (400 MHz,  $\text{CDCl}_3$ )  $\delta$  7.25 (d,  $J = 8.0$  Hz, 2H), 7.14 (d,  $J = 7.9$  Hz, 2H), 6.78-6.76 (m, 2H), 6.58-6.56 (m, 2H), 4.38-4.32 (m, 1H), 4.22 (s, 2H), 2.34 (s, 3H), 1.28 (d,  $J = 6.1$  Hz, 6H);  $^{13}\text{C}$  NMR (100 MHz,  $\text{CDCl}_3$ )  $\delta$  150.0, 142.7, 136.8, 136.5, 129.2, 127.5, 117.9, 113.9, 71.1, 48.9, 22.2, 21.1. HRMS (ESI,  $m/z$ ):  $[\text{M}+\text{H}]^+$  Calcd. for  $\text{C}_{17}\text{H}_{21}\text{NO}$ , 256.1701; found, 256.1690.

#### **4-isopropoxy-*N*-(2-methoxybenzyl)aniline (3da)**

108.40 mg, 80% yield, brown solid, mp. 64.0-65.0 °C. TLC (hexane/ethyl acetate = 30/1, v/v):  $R_f = 0.26$ .  $^1\text{H}$  NMR (400 MHz,  $\text{CDCl}_3$ )  $\delta$  7.17 (d,  $J = 7.4$  Hz, 1H), 7.10 (t,  $J = 7.8$  Hz, 1H), 6.79-6.72 (m, 2H), 6.65-6.63 (m, 2H), 6.46 (dd,  $J = 8.7$ , 1.7 Hz, 2H), 4.24-4.18 (m, 1H), 4.14 (s, 2H), 3.68 (s, 3H), 1.15 (dd,  $J = 6.1$ , 1.8 Hz, 6H);  $^{13}\text{C}$  NMR (100 MHz,  $\text{CDCl}_3$ )  $\delta$  157.2, 149.8, 142.7, 128.8, 128.0, 127.4, 120.3, 117.7, 114.1, 110.0, 70.8, 55.0, 44.2, 22.0. HRMS (ESI,  $m/z$ ):  $[\text{M}+\text{Na}]^+$  Calcd. for  $\text{C}_{17}\text{H}_{21}\text{NNaO}_2$ , 294.1470; found, 294.1469.

#### **4-isopropoxy-*N*-(3-methoxybenzyl)aniline (3ea)**

111.11 mg, 82% yield, brown oil. TLC (hexane/ethyl acetate = 30/1, v/v):  $R_f = 0.26$ .  $^1\text{H}$  NMR (400 MHz,  $\text{CDCl}_3$ )  $\delta$  7.28-7.22 (m, 1H), 6.95 (d,  $J = 13.1$  Hz, 2H), 6.83-6.74 (m, 3H), 6.61-6.55 (m, 2H), 4.38-4.32 (m, 1H), 4.25 (s, 2H), 3.79 (d,  $J = 1.7$  Hz, 3H),

1.28 (dd,  $J = 6.1, 2.9$  Hz, 6H);  $^{13}\text{C}$  NMR (100 MHz,  $\text{CDCl}_3$ )  $\delta$  159.8, 150.1, 142.6, 141.4, 129.6, 119.8, 117.9, 114.0, 113.0, 112.6, 71.1, 55.2, 49.2, 22.2. HRMS (ESI,  $m/z$ ):  $[\text{M}+\text{Na}]^+$  Calcd. for  $\text{C}_{17}\text{H}_{21}\text{NNaO}_2$ , 294.1470; found, 294.1469.

#### **4-isopropoxy-*N*-(4-propoxybenzyl)aniline (3fa)**

106.92 mg, 72% yield, yellow oil. TLC (hexane/ethyl acetate = 30/1, v/v):  $R_f = 0.26$ .  $^1\text{H}$  NMR (400 MHz,  $\text{CDCl}_3$ )  $\delta$  7.18 (d,  $J = 8.0$  Hz, 2H), 6.78 (d,  $J = 8.1$  Hz, 2H), 6.69 (d,  $J = 8.5$  Hz, 2H), 6.50-6.48 (m, 2H), 4.29-4.23 (m, 1H), 4.09 (s, 2H), 3.81 (t,  $J = 6.5$  Hz, 2H), 1.76-1.67 (m, 2H), 1.20 (d,  $J = 6.1$  Hz, 6H), 0.94 (t,  $J = 7.4$  Hz, 3H);  $^{13}\text{C}$  NMR (100 MHz,  $\text{CDCl}_3$ )  $\delta$  158.3, 150.0, 142.7, 131.4, 128.8, 117.9, 114.5, 113.9, 71.1, 69.4, 48.6, 22.5, 22.1, 10.5. HRMS (ESI,  $m/z$ ):  $[\text{M}+\text{Na}]^+$  Calcd. for  $\text{C}_{17}\text{H}_{25}\text{NNaO}_2$ , 322.1783; found, 322.1790.

#### **4-isopropoxy-*N*-(4-isopropylbenzyl)aniline (3ga)**

113.2 mg, 80% yield, brown oil. TLC (hexane/ethyl acetate = 30/1, v/v):  $R_f = 0.26$ .  $^1\text{H}$  NMR (400 MHz,  $\text{CDCl}_3$ )  $\delta$  7.29 (d,  $J = 8.2$  Hz, 2H), 7.20 (d,  $J = 8.1$  Hz, 2H), 6.79 - 6.75 (m, 2H), 6.60-6.56 (m, 2H), 4.42-4.32 (m, 1H), 4.22 (s, 2H), 2.95-2.85 (m, 1H), 1.28 (d,  $J = 6.1$  Hz, 6H), 1.24 (d,  $J = 7.0$  Hz, 6H);  $^{13}\text{C}$  NMR (100 MHz,  $\text{CDCl}_3$ )  $\delta$  147.8, 142.8, 136.9, 127.7, 126.6, 117.9, 113.9, 71.1, 48.9, 33.8, 24.0, 22.2. HRMS (ESI,  $m/z$ ):  $[\text{M}+\text{H}]^+$  Calcd. for  $\text{C}_{17}\text{H}_{25}\text{NO}$ , 284.2014; found, 284.2030.

#### **4-isopropoxy-*N*-(4-nitrobenzyl)aniline (3ha)**

71.5 mg, 50% yield, brown oil. TLC (hexane/ethyl acetate = 30/1, v/v):  $R_f = 0.25$ .  $^1\text{H}$  NMR (400 MHz,  $\text{CDCl}_3$ )  $\delta$  8.21-8.13 (m, 2H), 7.53 (d,  $J = 8.1$  Hz, 2H), 6.78-6.72 (m, 2H), 6.55-6.49 (m, 2H), 4.41 (s, 2H), 4.38-4.32 (m, 1H), 1.27 (d,  $J = 6.1$  Hz, 6H);  $^{13}\text{C}$  NMR (100 MHz,  $\text{CDCl}_3$ )  $\delta$  150.5, 147.8, 147.0, 141.6, 127.7, 123.8, 117.8, 114.0, 71.0, 48.4, 22.1. HRMS (ESI,  $m/z$ ):  $[\text{M}+\text{H}]^+$  Calcd. for  $\text{C}_{17}\text{H}_{18}\text{N}_2\text{O}_3$ , 287.1396; found, 287.1381.

#### ***N*-(2-fluorobenzyl)-4-isopropoxyaniline (3ia)**

108.78 mg, 84% yield, brown oil. TLC (hexane/ethyl acetate = 30/1, v/v):  $R_f = 0.25$ .  $^1\text{H}$  NMR (400 MHz,  $\text{CDCl}_3$ )  $\delta$  7.37-7.33 (m, 1H), 7.23-7.27 (m, 1H), 7.08-6.99 (m, 2H), 6.77-6.73 (m, 2H), 6.58 - 6.54 (m, 2H), 4.36-4.31 (m, 3H), 1.26 (d,  $J = 6.1$  Hz, 6H);  $^{13}\text{C}$  NMR (100 MHz,  $\text{CDCl}_3$ )  $\delta$  162.0, 159.6, 150.2, 142.1, 129.4 (d,  $J = 4.6$  Hz),

128.6 (d,  $J = 8.1$  Hz), 126.5 (d,  $J = 14.5$  Hz), 124.1 (d,  $J = 3.5$  Hz), 117.8, 115.3, 115.1, 114.1, 70.9, 42.6 (d,  $J = 4.1$  Hz), 22.1;  $^{19}\text{F}$  NMR (377 MHz,  $\text{CDCl}_3$ )  $\delta$  -119.1 (s, 1F). HRMS (ESI,  $m/z$ ):  $[\text{M}+\text{H}]^+$  Calcd. for  $\text{C}_{17}\text{H}_{18}\text{FNO}$ , 260.1451; found, 260.1455.

***N*-(2-aminobenzyl)-4-isopropoxyaniline (3ja)**

94.85 mg, 70% yield, brown solid, mp. 63.0-65.0 °C. TLC (hexane/ethyl acetate = 5/1, v/v):  $R_f = 0.28$ .  $^1\text{H}$  NMR (400 MHz,  $\text{CDCl}_3$ )  $\delta$  7.15-7.11 (m, 2H), 6.81 (dd,  $J = 8.7$ , 1.8 Hz, 2H), 6.75-6.59 (m, 4H), 4.41-4.35 (m, 1H), 4.16 (s, 2H), 1.30 (dd,  $J = 6.0$ , 2.1 Hz, 6H);  $^{13}\text{C}$  NMR (100 MHz,  $\text{CDCl}_3$ )  $\delta$  150.6, 146.0, 142.6, 130.0, 128.8, 123.1, 118.2, 117.8, 116.3, 115.8, 114.8, 71.0, 48.1, 22.1. HRMS (ESI,  $m/z$ ):  $[\text{M}+\text{H}]^+$  Calcd. for  $\text{C}_{17}\text{H}_{20}\text{N}_2\text{O}$ , 257.1654; found, 257.1652.

***N*-(2, 3-dimethylbenzyl)-4-isopropoxyaniline (3ka)**

111.64 mg, 83% yield, brown oil. TLC (hexane/ethyl acetate = 30/1, v/v):  $R_f = 0.29$ .  $^1\text{H}$  NMR (400 MHz,  $\text{CDCl}_3$ )  $\delta$  7.18 (d,  $J = 7.1$  Hz, 1H), 7.12-7.05 (m, 2H), 6.79 (d,  $J = 8.7$  Hz, 2H), 6.58 (d,  $J = 8.7$  Hz, 2H), 4.39-4.33 (m, 1H), 4.21 (s, 2H), 2.31 (s, 3H), 2.26 (s, 3H), 1.29 (d,  $J = 6.0$  Hz, 6H);  $^{13}\text{C}$  NMR (100 MHz,  $\text{CDCl}_3$ )  $\delta$  150.0, 142.9, 137.1, 137.0, 135.1, 129.1, 126.6, 125.9, 125.5, 118.0, 115.1, 113.7, 71.2, 47.9, 22.2, 21.7, 20.4, 14.7. HRMS (ESI,  $m/z$ ):  $[\text{M}+\text{Na}]^+$  Calcd. for  $\text{C}_{18}\text{H}_{23}\text{NNaO}$ , 292.1672; found, 292.1682.

***N*-(2, 5-dimethylbenzyl)-4-isopropoxyaniline (3la)**

100.88 mg, 75% yield, brown oil. TLC (hexane/ethyl acetate = 30/1, v/v):  $R_f = 0.27$ .  $^1\text{H}$  NMR (400 MHz,  $\text{CDCl}_3$ )  $\delta$  7.08 (s, 1H), 7.00 (d,  $J = 7.6$  Hz, 1H), 6.93 (d,  $J = 7.8$  Hz, 1H), 6.75-6.67 (m, 2H), 6.55-6.46 (m, 2H), 4.39-4.33 (m, 1H), 4.09 (s, 2H), 2.23 (d,  $J = 8.6$  Hz, 6H), 1.21 (dd,  $J = 6.1$ , 1.8 Hz, 6H);  $^{13}\text{C}$  NMR (100 MHz,  $\text{CDCl}_3$ )  $\delta$  150.0, 143.0, 137.0, 135.6, 133.2, 130.3, 129.1, 128.0, 118.0, 113.8, 71.2, 47.3, 22.2, 21.0, 18.5. HRMS (ESI,  $m/z$ ):  $[\text{M}+\text{H}]^+$  Calcd. for  $\text{C}_{18}\text{H}_{23}\text{NO}$ , 270.1858; found, 270.1873.

***N*-(2,4-dimethylbenzyl)-4-isopropoxyaniline (3ma)**

83.39 mg, 62% yield, brown oil. TLC (hexane/ethyl acetate = 30/1, v/v):  $R_f = 0.27$ .  $^1\text{H}$  NMR (400 MHz,  $\text{CDCl}_3$ )  $\delta$  7.11 (dd,  $J = 7.2$ , 2.8 Hz, 1H), 6.95-6.85 (m, 2H), 6.69 (dd,  $J = 8.8$ , 3.1 Hz, 2H), 6.48 (dd,  $J = 8.8$ , 3.1 Hz, 2H), 4.30-4.24 (m, 1H), 4.07 (d,  $J =$



2.4 Hz, 2H), 2.23 (dd,  $J = 6.8, 2.7$  Hz, 6H), 1.20 (dd,  $J = 6.0, 3.3$  Hz, 6H);  $^{13}\text{C}$  NMR (100 MHz,  $\text{CDCl}_3$ )  $\delta$  150.0, 142.9, 137.0, 136.2, 134.2, 131.2, 128.4, 126.7, 118.0, 113.7, 71.2, 47.0, 22.2, 21.0, 18.8. HRMS (ESI,  $m/z$ ):  $[\text{M}+\text{H}]^+$  Calcd. for  $\text{C}_{18}\text{H}_{23}\text{NO}$ , 270.1858; found, 270.1839.

#### **4-isopropoxy-*N*-(2,4,5-trimethylbenzyl)aniline (3na)**

100.13 mg, 75% yield, brown oil. TLC (hexane/ethyl acetate = 30/1, v/v):  $R_f = 0.27$ .  $^1\text{H}$  NMR (400 MHz,  $\text{CDCl}_3$ )  $\delta$  6.81 (s, 2H), 6.74 (d,  $J = 8.9$  Hz, 2H), 6.53 (d,  $J = 8.9$  Hz, 2H), 4.32-4.26 (m, 1H), 4.06 (s, 2H), 2.27 (s, 6H), 2.20 (s, 3H), 1.22 (d,  $J = 6.1$  Hz, 6H);  $^{13}\text{C}$  NMR (100 MHz,  $\text{CDCl}_3$ )  $\delta$  149.9, 143.3, 137.4, 137.1, 132.4, 129.0, 118.1, 113.5, 71.3, 43.1, 22.2, 20.9, 19.4. HRMS (ESI,  $m/z$ ):  $[\text{M}+\text{H}]^+$  Calcd. for  $\text{C}_{19}\text{H}_{25}\text{NO}$ , 284.2014; found, 284.1995.

#### ***N*-(4-fluoro-3-methylbenzyl)-4-isopropoxyaniline (3oa)**

101.01 mg, 74% yield, brown oil. TLC (hexane/ethyl acetate = 30/1, v/v):  $R_f = 0.26$ .  $^1\text{H}$  NMR (400 MHz,  $\text{CDCl}_3$ )  $\delta$  7.18-7.11 (m, 2H), 6.97-6.92 (m, 1H), 6.77 (dd,  $J = 8.9, 2.1$  Hz, 2H), 6.56 (dd,  $J = 8.9, 2.0$  Hz, 2H), 4.38-4.32 (m, 1H), 4.17 (s, 2H), 2.25 (s, 3H), 1.28 (dd,  $J = 6.1, 2.0$  Hz, 6H);  $^{13}\text{C}$  NMR (100 MHz,  $\text{CDCl}_3$ )  $\delta$  160.4 (d,  $J = 243.6$  Hz), 150.1, 142.5, 135.0 (d,  $J = 3.5$  Hz), 130.6 (d,  $J = 5.1$  Hz), 126.3 (d,  $J = 8.0$  Hz), 124.8 (d,  $J = 17.4$  Hz), 117.9, 114.9 (d,  $J = 22.4$  Hz), 113.9, 71.0, 48.5, 22.1, 14.5 (d,  $J = 3.5$  Hz);  $^{19}\text{F}$  NMR (377 MHz,  $\text{CDCl}_3$ )  $\delta$  -112.8 (s, 1F). HRMS (ESI,  $m/z$ ):  $[\text{M}+\text{H}]^+$  Calcd. for  $\text{C}_{17}\text{H}_{20}\text{FNO}$ , 274.1607; found, 274.1590.

#### ***N*-(2, 3-difluorobenzyl)-4-isopropoxyaniline (3pa)**

109.42 mg, 79% yield, brown oil. TLC (hexane/ethyl acetate = 30/1, v/v):  $R_f = 0.26$ .  $^1\text{H}$  NMR (400 MHz,  $\text{CDCl}_3$ )  $\delta$  7.11 (t,  $J = 6.6$  Hz, 1H), 7.06-6.95 (m, 2H), 6.75 (d,  $J = 8.6$  Hz, 2H), 6.55 (d,  $J = 8.7$  Hz, 2H), 4.34 (s, 3H), 1.27 (d,  $J = 6.1$  Hz, 6H);  $^{13}\text{C}$  NMR (100 MHz,  $\text{CDCl}_3$ )  $\delta$  151.7 (d,  $J = 12.5$  Hz), 150.5, 150.0 (d,  $J = 12.7$  Hz), 149.3 (d,  $J = 12.4$  Hz), 147.5 (d,  $J = 12.8$  Hz), 141.9, 129.3 (d,  $J = 11.3$  Hz), 124.2, 124.1 (q,  $J = 2.9$  Hz), 117.9, 115.9 (d,  $J = 17.2$  Hz), 114.2, 71.1, 42.4 (t,  $J = 3.6$  Hz), 22.2;  $^{19}\text{F}$  NMR (377 MHz,  $\text{CDCl}_3$ )  $\delta$  -138.8 (d,  $J = 20.9$  Hz, 1F), -144.3 (d,  $J = 20.8$  Hz, 1F). HRMS (ESI,  $m/z$ ):  $[\text{M}+\text{H}]^+$  Calcd. for  $\text{C}_{16}\text{H}_{17}\text{F}_2\text{NO}$ , 278.1356; found, 278.1358.

***N*-(2, 4-difluorobenzyl)-4-isopropoxyaniline (3qa)**

99.72 mg, 72% yield, brown oil. TLC (hexane/ethyl acetate = 30/1, v/v):  $R_f$  = 0.25.  $^1\text{H}$  NMR (400 MHz,  $\text{CDCl}_3$ )  $\delta$  7.38-7.30 (m, 1H), 6.85-6.74 (m, 4H), 6.61-6.54 (m, 2H), 4.39-4.33 (m, 1H), 4.30 (s, 2H), 1.28 (d,  $J$  = 6.1 Hz, 6H);  $^{13}\text{C}$  NMR (100 MHz,  $\text{CDCl}_3$ )  $\delta$  162.6 (dd,  $J$  = 135.6, 11.9 Hz), 160.2 (dd,  $J$  = 136.1, 11.8 Hz), 150.4, 141.9, 130.3 (dd,  $J$  = 9.6, 6.2 Hz), 122.4 (dd,  $J$  = 14.7, 3.7 Hz), 117.8, 114.2, 111.1 (dd,  $J$  = 21.0, 3.6 Hz), 103.8 (t,  $J$  = 25.4 Hz), 71.0, 42.3 (d,  $J$  = 3.4 Hz), 22.1;  $^{19}\text{F}$  NMR (377 MHz,  $\text{CDCl}_3$ )  $\delta$  -111.9 (d,  $J$  = 7.5 Hz, 1F), -115.0 (d,  $J$  = 7.0 Hz, 1F). HRMS (ESI,  $m/z$ ):  $[\text{M}+\text{H}]^+$  Calcd. for  $\text{C}_{16}\text{H}_{17}\text{F}_2\text{NO}$ , 278.1356; found, 278.1358.

***4*-isopropoxy-*N*-(2-phenylpropyl)aniline (3ra)**

82.05 mg, 61% yield, brown oil. TLC (hexane/ethyl acetate = 30/1, v/v):  $R_f$  = 0.20.  $^1\text{H}$  NMR (400 MHz,  $\text{CDCl}_3$ )  $\delta$  7.31 (t,  $J$  = 7.5 Hz, 2H), 7.21 (d,  $J$  = 7.5 Hz, 3H), 6.76 - 6.74 (m, 2H), 6.51-6.49 (m, 2H), 4.37-4.31 (m, 1H), 3.28 (dd,  $J$  = 12.1, 6.1 Hz, 1H), 3.17 (dd,  $J$  = 12.0, 8.4 Hz, 1H), 3.18-2.99 (m, 1H), 1.31 (dd,  $J$  = 6.9, 1.9 Hz, 3H), 1.27 (d,  $J$  = 6.3 Hz, 6H);  $^{13}\text{C}$  NMR (100 MHz,  $\text{CDCl}_3$ )  $\delta$  149.9, 144.5, 142.5, 128.6, 127.2, 126.5, 117.9, 114.1, 71.1, 51.8, 39.2, 22.1, 19.7. HRMS (ESI,  $m/z$ ):  $[\text{M}+\text{H}]^+$  Calcd. for  $\text{C}_{18}\text{H}_{23}\text{NO}$ , 270.1858; found, 270.1873.

***N*-(3, 5-di-*tert*-butylbenzyl)-4-isopropoxyaniline (3sa)**

135.91 mg, 77% yield, brown oil. TLC (hexane/ethyl acetate = 30/1, v/v):  $R_f$  = 0.30.  $^1\text{H}$  NMR (400 MHz,  $\text{CDCl}_3$ )  $\delta$  7.28 (s, 1H), 7.17-7.12 (m, 2H), 6.72 (d,  $J$  = 8.8 Hz, 2H), 6.55 (d,  $J$  = 8.8 Hz, 2H), 4.31-4.25 (m, 1H), 4.15 (s, 2H), 1.24 (s, 18H), 1.21 (d,  $J$  = 6.1 Hz, 6H);  $^{13}\text{C}$  NMR (100 MHz,  $\text{CDCl}_3$ )  $\delta$  151.0, 150.0, 143.0, 138.5, 125.9, 122.2, 121.3, 118.1, 115.1, 114.0, 71.2, 50.1, 34.8, 31.4, 22.1. HRMS (ESI,  $m/z$ ):  $[\text{M}+\text{H}]^+$  Calcd. for  $\text{C}_{24}\text{H}_{35}\text{NO}$ , 354.2797; found, 354.2801.

***4*-isopropoxy-*N*-(naphthalen-2-ylmethyl)aniline (3ta)**

77.12 mg, 53% yield, yellow solid, mp. 56.0 °C. TLC (hexane/ethyl acetate = 30/1, v/v):  $R_f$  = 0.23.  $^1\text{H}$  NMR (400 MHz,  $\text{CDCl}_3$ )  $\delta$  7.83-7.79 (m, 4H), 7.50-7.44 (m, 3H), 6.77 (dd,  $J$  = 8.9, 2.1 Hz, 2H), 6.62 (dd,  $J$  = 8.9, 2.0 Hz, 2H), 4.43 (s, 2H), 4.38-4.32 (m, 1H), 1.28 (dd,  $J$  = 6.3, 2.1 Hz, 6H);  $^{13}\text{C}$  NMR (100 MHz,  $\text{CDCl}_3$ )  $\delta$  150.2, 142.6, 137.2, 133.4, 132.7, 128.3, 127.7, 127.6, 126.1, 125.9, 125.8, 125.6, 117.9, 114.1,

71.1, 49.4, 22.2. HRMS (ESI, m/z):  $[M+Na]^+$  Calcd. for  $C_{20}H_{21}NNaO$ , 314.1521; found, 314.1526.

**(Z)-4-isopropoxy-N-(4-methyl-1-phenylpent-1-en-1-yl)aniline (3ua)**

81.89 mg, 53% yield, brown oil. TLC (hexane/ethyl acetate = 30/1, v/v):  $R_f = 0.19$ .  $^1H$  NMR (400 MHz,  $CDCl_3$ )  $\delta$  7.36-7.31 (m, 2H), 7.28-7.24 (m, 1H), 7.15 (d,  $J = 7.5$  Hz, 2H), 6.76 (dd,  $J = 8.9, 2.5$  Hz, 2H), 6.54 (dd,  $J = 8.9, 2.5$  Hz, 2H), 5.70 (t,  $J = 6.8$  Hz, 1H), 4.38-4.32 (m, 1H), 3.93 (s, 2H), 1.85 (t,  $J = 6.0$  Hz, 2H), 1.62-1.53 (m, 1H), 1.28 (dd,  $J = 6.0, 2.4$  Hz, 6H), 0.79 (dd,  $J = 6.6, 2.3$  Hz, 6H);  $^{13}C$  NMR (100 MHz,  $CDCl_3$ )  $\delta$  149.9, 142.5, 139.6, 138.2, 128.6, 128.4, 128.2, 126.8, 117.9, 114.4, 71.1, 52.2, 37.6, 28.8, 22.3, 22.2. HRMS (ESI, m/z):  $[M+Na]^+$  Calcd. for  $C_{21}H_{27}NNaO$ , 332.1990; found, 332.1978.

**4-isopropoxy-N-((4-(prop-1-en-2-yl)cyclohex-1-en-1-yl)methyl)aniline (3va)**

78.38 mg, 55% yield, brown oil. TLC (hexane/ethyl acetate = 30/1, v/v):  $R_f = 0.18$ .  $^1H$  NMR (400 MHz,  $CDCl_3$ )  $\delta$  6.77 (dd,  $J = 8.9, 2.1$  Hz, 2H), 6.56 (dd,  $J = 8.8, 2.1$  Hz, 2H), 5.69 (s, 1H), 4.71 (d,  $J = 4.2$  Hz, 2H), 4.38-4.32 (m, 1H), 3.58 (s, 2H), 2.12 (t,  $J = 13.9$  Hz, 4H), 1.99-1.83 (m, 3H), 1.74 (s, 3H), 1.29 (dd,  $J = 6.1, 2.1$  Hz, 6H);  $^{13}C$  NMR (100 MHz,  $CDCl_3$ )  $\delta$  149.9, 149.8, 143.0, 135.2, 127.7, 126.6, 122.3, 117.9, 113.9, 108.6, 71.1, 50.9, 41.1, 31.3, 30.5, 27.6, 27.2, 22.2, 20.8. HRMS (ESI, m/z):  $[M+H]^+$  Calcd. for  $C_{19}H_{27}NO$ , 286.2171; found, 286.2168.

**2-allyl-6-(((4-isopropoxyphenyl)amino)methyl)phenol (3wa)**

69.80 mg, 47% yield, brown solid, mp. 55.0 °C. TLC (hexane/ethyl acetate = 30/1, v/v):  $R_f = 0.30$ .  $^1H$  NMR (400 MHz,  $CDCl_3$ )  $\delta$  7.08 (d,  $J = 7.5$  Hz, 1H), 6.98 (d,  $J = 7.6$  Hz, 1H), 6.79 (d,  $J = 8.6$  Hz, 5H), 6.09-5.94 (m, 1H), 5.13-5.01 (m, 2H), 4.44-4.38 (m, 1H), 4.33 (s, 2H), 3.40 (d,  $J = 6.5$  Hz, 2H), 1.29 (d,  $J = 6.0$  Hz, 6H);  $^{13}C$  NMR (100 MHz,  $CDCl_3$ )  $\delta$  154.9, 152.5, 140.5, 136.9, 129.4, 127.3, 126.6, 122.5, 119.4, 117.7, 117.2, 115.4, 70.6, 50.1, 33.9, 22.0. HRMS (ESI, m/z):  $[M+H]^+$  Calcd. for  $C_{19}H_{23}NO_2$ , 298.1807; found, 298.1809.

**(E)-N-(3-(furan-3-yl)allyl)-4-isopropoxyaniline (3xa)**

25.7 mg, 20% yield, brown oil. TLC (hexane/ethyl acetate = 20/1, v/v):  $R_f = 0.36$ .  $^1H$  NMR (400 MHz,  $CDCl_3$ )  $\delta$  7.33 (s, 1H), 6.78 (d,  $J = 8.8$  Hz, 2H), 6.60 (d,  $J = 8.8$  Hz,

2H), 6.43 (d,  $J = 15.9$  Hz, 1H), 6.36-6.35 (m, 1H), 6.27 (dt,  $J = 15.9, 5.6$  Hz, 1H), 6.19 (d,  $J = 3.1$  Hz, 1H), 4.39-4.33 (m, 1H), 3.86 (d,  $J = 5.4$  Hz, 2H), 1.29 (d,  $J = 6.1$  Hz, 6H);  $^{13}\text{C}$  NMR (100 MHz,  $\text{CDCl}_3$ )  $\delta$  152.5, 150.2, 142.3, 141.8, 126.1, 119.6, 117.9, 114.2, 111.2, 107.5, 71.1, 46.7, 22.2. HRMS (ESI,  $m/z$ ):  $[\text{M}+\text{H}]^+$  Calcd. for  $\text{C}_{16}\text{H}_{19}\text{NO}_2$ , 258.1494; found, 258.1469.

#### **2-(benzylamino)benzoic acid (3ab)**

48.81 mg, 43% yield, brown oil. TLC (hexane/ethyl acetate = 5/1, v/v):  $R_f = 0.21$ .  $^1\text{H}$  NMR (400 MHz,  $\text{CDCl}_3$ )  $\delta$  7.92 (d,  $J = 8.0$  Hz, 1H), 7.28 (d,  $J = 3.8$  Hz, 4H), 7.19 (s, 2H), 6.56 (t,  $J = 8.4$  Hz, 2H) 4.42(s, 2H) ;  $^{13}\text{C}$  NMR (100 MHz,  $\text{CDCl}_3$ )  $\delta$  173.1, 151.6, 138.7, 135.6, 132.6, 128.7, 127.2, 126.9, 115.1, 111.8, 108.8, 46.8. HRMS (ESI,  $m/z$ ):  $[\text{M}+\text{H}]^+$  Calcd. for  $\text{C}_{14}\text{H}_{13}\text{NO}_2$ , 228.1025; found, 228.1020.

#### **4-isopropoxy-*N*-(4-phenylbutan-2-yl)aniline (4aa)**

133.01 mg, 94% yield, brown oil. TLC (petroleum ether/ethyl acetate = 10/1, v/v):  $R_f = 0.26$ .  $^1\text{H}$  NMR (400 MHz,  $\text{CDCl}_3$ )  $\delta$  7.26 (m,  $J = 8.9, 8.3$  Hz, 2H), 7.18 (d,  $J = 7.4$  Hz, 3H), 6.75 (d,  $J = 8.9$  Hz, 2H), 6.48 (d,  $J = 9.0$  Hz, 2H), 4.38-4.32 (m, 1H), 3.43-3.35 (m, 1H), 2.72 (t,  $J = 7.9$  Hz, 2H), 1.91-1.82 (m, 1H), 1.77-1.68 (m, 1H), 1.28 (d,  $J = 6.0$  Hz, 6H), 1.19 (d,  $J = 6.2$  Hz, 3H);  $^{13}\text{C}$  NMR (100 MHz,  $\text{CDCl}_3$ )  $\delta$  149.8, 142.1, 142.0, 128.5, 128.4, 125.9, 118.1, 114.6, 71.2, 48.9, 38.9, 32.5, 22.3, 20.9. HRMS (ESI,  $m/z$ ):  $[\text{M}+\text{H}]^+$  Calcd. for  $\text{C}_{19}\text{H}_{25}\text{NO}$ , 284.2014; found, 284.2030. The enantiomeric excess was determined by HPLC using Daicel Chiralpak OD-H column, hexane/*i*-PrOH 85:15, flow rate 1.0 mL/min, UV detection at 220 nm,  $t_{\text{minor}} = 7.511$  min,  $t_{\text{major}} = 7.881$  min, 0% *ee*.

#### ***N*-cyclohexyl-4-isopropoxyaniline (4ba)**

103.69 mg, 89% yield, brown oil. TLC (petroleum ether/ethyl acetate = 20/1, v/v):  $R_f = 0.28$ .  $^1\text{H}$  NMR (400 MHz,  $\text{CDCl}_3$ )  $\delta$  6.77-6.74 (m, 2H), 6.55-6.53 (m, 2H), 4.38-4.32 (m, 1H), 3.15 (tt,  $J = 10.0, 3.6$  Hz, 1H), 3.08 (s, 1H), 2.06-2.02 (m, 2H), 1.75 (dt,  $J = 13.2, 3.9$  Hz, 2H), 1.66-1.61 (m, 1H), 1.38-1.17 (m, 10H);  $^{13}\text{C}$  NMR (100 MHz,  $\text{CDCl}_3$ )  $\delta$  149.8, 141.8, 118.1, 114.6, 71.2, 52.7, 33.7, 26.0, 25.1, 22.3. HRMS (ESI,  $m/z$ ):  $[\text{M}+\text{H}]^+$  Calcd. for  $\text{C}_{15}\text{H}_{23}\text{NO}$ , 234.1858; found, 234.1876.

#### ***N*-cyclobutyl-4-isopropoxyaniline (4ca)**

80.98 mg, 79% yield, brown oil. TLC (petroleum ether/ethyl acetate = 20/1, v/v):  $R_f$  = 0.23.  $^1\text{H}$  NMR (400 MHz,  $\text{CDCl}_3$ )  $\delta$  6.76 (dd,  $J$  = 8.8, 1.6 Hz, 2H), 6.49 (dd,  $J$  = 8.8, 1.5 Hz, 2H), 4.38-4.32 (m, 1H), 3.87-3.81 (m, 1H), 2.39-2.38 (m, 2H), 1.80-1.77 (m, 4H), 1.28 (dd,  $J$  = 6.1, 1.5 Hz, 6H);  $^{13}\text{C}$  NMR (100 MHz,  $\text{CDCl}_3$ )  $\delta$  150.1, 141.7, 118.0, 114.3, 71.1, 49.8, 31.4, 22.3, 15.3. HRMS (ESI, m/z):  $[\text{M}+\text{H}]^+$  Calcd. for  $\text{C}_{13}\text{H}_{19}\text{NO}$ , 206.1545; found, 206.1552.

***N*-(1-cyclopropylethyl)-4-isopropoxyaniline (4da)**

82.13 mg, 75% yield, brown oil. TLC (petroleum ether/ethyl acetate = 20/1, v/v):  $R_f$  = 0.25.  $^1\text{H}$  NMR (400 MHz,  $\text{CDCl}_3$ )  $\delta$  6.55 (d,  $J$  = 6.8 Hz, 2H), 6.34 (d,  $J$  = 6.8 Hz, 2H), 4.17-4.11 (m, 1H), 2.67-2.61 (m, 1H), 1.07 (d,  $J$  = 6.1 Hz, 6H), 0.99 (d,  $J$  = 6.4 Hz, 3H), 0.72-0.65 (m, 1H), 0.26 (d,  $J$  = 8.4 Hz, 2H), 0.09 -0.00 (m, 2H);  $^{13}\text{C}$  NMR (100 MHz,  $\text{CDCl}_3$ )  $\delta$  149.9, 142.3, 117.9, 114.9, 71.1, 53.7, 22.3, 20.3, 18.0, 3.3, 2.6. HRMS (ESI, m/z):  $[\text{M}+\text{H}]^+$  Calcd. for  $\text{C}_{14}\text{H}_{21}\text{NO}$ , 220.1701; found, 220.1711.

***N*-(4-isopropoxyphenyl)-2, 3-dihydro-1*H*-inden-1-amine (4ea)**

92.12 mg, 69% yield, brown oil. TLC (petroleum ether/ethyl acetate = 20/1, v/v):  $R_f$  = 0.43.  $^1\text{H}$  NMR (400 MHz,  $\text{CDCl}_3$ )  $\delta$  7.35 (d,  $J$  = 7.2 Hz, 1H), 7.23-7.15 (m, 3H), 6.79 (d,  $J$  = 8.8 Hz, 2H), 6.63 (d,  $J$  = 8.8 Hz, 2H), 4.92 (t,  $J$  = 6.7 Hz, 1H), 4.39-4.33 (m, 1H), 3.02-2.95 (m, 1H), 2.89-2.81 (m, 1H), 2.58-2.49 (m, 1H), 1.87 (dt,  $J$  = 12.8, 7.1 Hz, 1H), 1.29 (d,  $J$  = 6.2 Hz, 6H);  $^{13}\text{C}$  NMR (100 MHz,  $\text{CDCl}_3$ )  $\delta$  150.1, 144.9, 143.7, 142.3, 127.9, 126.7, 124.9, 124.4, 118.2, 114.5, 71.2, 59.5, 34.0, 30.3, 22.3. HRMS (ESI, m/z):  $[\text{M}+\text{H}]^+$  Calcd. for  $\text{C}_{18}\text{H}_{21}\text{NO}$ , 268.1701; found, 268.1671.

***N*-(4-isopropoxyphenyl)-5-methoxy-2, 3-dihydro-1*H*-inden-1-amine (4fa)**

102.47 mg, 69% yield, brown oil. TLC (petroleum ether/ethyl acetate = 10/1, v/v):  $R_f$  = 0.19.  $^1\text{H}$  NMR (400 MHz,  $\text{CDCl}_3$ )  $\delta$  7.25 (d,  $J$  = 8.3 Hz, 1H), 6.82-6.76 (m, 3H), 6.74 (dd,  $J$  = 8.3, 2.4 Hz, 1H), 6.64 (d,  $J$  = 8.9 Hz, 2H), 4.88 (t,  $J$  = 6.3 Hz, 1H), 4.39-4.32 (m, 1H), 3.79 (s, 3H), 3.02-2.94 (m, 1H), 2.88-2.80 (m, 1H), 2.57-2.49 (m, 1H), 1.95-1.86 (m, 1H), 1.30 (d,  $J$  = 6.0 Hz, 6H);  $^{13}\text{C}$  NMR (100 MHz,  $\text{CDCl}_3$ )  $\delta$  159.8, 149.9, 145.3, 142.2, 136.8, 124.9, 118.0, 114.3, 112.6, 109.8, 71.1, 58.7, 55.4, 34.0, 30.4, 22.2. HRMS (ESI, m/z):  $[\text{M}+\text{H}]^+$  Calcd. for  $\text{C}_{19}\text{H}_{23}\text{NO}$ , 298.1807; found, 298.1809.

***N*-(4-isopropoxyphenyl)-1, 2, 3, 4-tetrahydronaphthalen-1-amine (4ga)**

91.33 mg, 65% yield, brown oil. TLC (petroleum ether/ethyl acetate = 30/1, v/v):  $R_f$  = 0.21.  $^1\text{H}$  NMR (400 MHz,  $\text{CDCl}_3$ )  $\delta$  7.42 (d,  $J$  = 6.5 Hz, 1H), 7.21-7.11 (m, 3H), 6.80 (d,  $J$  = 8.9 Hz, 2H), 6.62 (d,  $J$  = 9.0 Hz, 2H), 4.54 (t,  $J$  = 4.8 Hz, 1H), 4.40-4.34 (m, 1H), 2.87-2.71 (m, 2H), 1.96-1.74 (m, 4H), 1.30 (d,  $J$  = 6.1 Hz, 6H);  $^{13}\text{C}$  NMR (100 MHz,  $\text{CDCl}_3$ )  $\delta$  149.8, 141.9, 138.4, 137.5, 129.3, 129.0, 127.0, 126.0, 118.1, 114.1, 71.2, 51.8, 29.3, 28.6, 22.2, 19.3. HRMS (ESI,  $m/z$ ):  $[\text{M}+\text{H}]^+$  Calcd. for  $\text{C}_{19}\text{H}_{23}\text{NO}$ , 282.1858; found, 282.1825.

**4-isopropoxy-*N*-((1*S*)-2-methyl-5-(prop-1-en-2-yl)cyclohexyl)aniline (4ha)**

101.18 mg, 71% yield, brown oil. TLC (petroleum ether/ethyl acetate = 5/1, v/v):  $R_f$  = 0.42.  $^1\text{H}$  NMR (400 MHz,  $\text{CDCl}_3$ )  $\delta$  6.76 (dd,  $J$  = 9.0, 2.9 Hz, 2H), 6.56 (d,  $J$  = 9.1 Hz, 2H), 4.66 (d,  $J$  = 2.0 Hz, 2H), 4.37-4.31 (m, 1H), 3.55 (s, 1H), 2.11-1.57 (m, 11H), 1.28 (dd,  $J$  = 6.1, 2.7 Hz, 6H), 0.97 (dd,  $J$  = 6.8, 3.2 Hz, 3H);  $^{13}\text{C}$  NMR (100 MHz,  $\text{CDCl}_3$ )  $\delta$  150.0, 149.4, 142.6, 118.0, 114.1, 108.4, 71.1, 53.6, 38.4, 35.4, 35.2, 31.2, 29.1, 22.2, 21.0, 18.9. HRMS (ESI,  $m/z$ ):  $[\text{M}+\text{H}]^+$  Calcd. for  $\text{C}_{19}\text{H}_{29}\text{NO}$ , 288.2373; found, 288.2363.

***N*-(4-isopropoxyphenyl)chroman-4-amine (4ia)**

96.22 mg, 68% yield, brown oil. TLC (petroleum ether/ethyl acetate = 10/1, v/v):  $R_f$  = 0.32.  $^1\text{H}$  NMR (400 MHz,  $\text{CDCl}_3$ )  $\delta$  7.32 (dd,  $J$  = 7.7, 1.7 Hz, 1H), 7.20-7.16 (m, 1H), 6.91-6.85 (m, 2H), 6.83-6.80 (m, 2H), 6.65-6.59 (m, 2H), 4.52 (t,  $J$  = 4.2 Hz, 1H), 4.41-4.35 (m, 1H), 4.25-4.18 (m, 2H), 2.12-2.08 (m, 2H), 1.30 (d,  $J$  = 6.1 Hz, 6H);  $^{13}\text{C}$  NMR (100 MHz,  $\text{CDCl}_3$ )  $\delta$  154.9, 150.1, 140.9, 130.1, 129.0, 125.9, 123.4, 120.5, 118.1, 116.9, 115.1, 114.0, 71.1, 62.6, 47.4, 27.7, 22.2, 22.1. HRMS (ESI,  $m/z$ ):  $[\text{M}+\text{H}]^+$  Calcd. for  $\text{C}_{18}\text{H}_{21}\text{NO}_2$ , 284.1651; found, 284.1616.

***N*-(1, 5-diphenylpentan-3-yl)-4-isopropoxyaniline (4ja)**

128.69 mg, 70% yield, brown oil. TLC (petroleum ether/ethyl acetate = 20/1, v/v):  $R_f$  = 0.21.  $^1\text{H}$  NMR (400 MHz,  $\text{CDCl}_3$ )  $\delta$  7.25 (t,  $J$  = 7.3 Hz, 4H), 7.19-7.15 (m, 2H), 7.11 (d,  $J$  = 8.1 Hz, 4H), 6.72 (d,  $J$  = 8.9 Hz, 2H), 6.38 (d,  $J$  = 8.9 Hz, 2H), 4.37-4.31 (m, 1H), 3.31-3.25 (m, 1H), 2.72-2.63 (m, 4H), 1.90-1.72 (m, 4H), 1.28 (dd,  $J$  = 6.1, 1.3 Hz, 6H);  $^{13}\text{C}$  NMR (100 MHz,  $\text{CDCl}_3$ )  $\delta$  149.6, 142.1, 142.0, 128.4, 128.3, 125.7,

117.9, 114.3, 71.0, 52.4, 36.7, 32.2, 22.2. HRMS (ESI, m/z): [M+H]<sup>+</sup> Calcd. for C<sub>26</sub>H<sub>31</sub>NO, 374.2484; found, 374.2462.

**4-isopropoxy-*N*-(nonan-2-yl)aniline (4ka)**

114.96 mg, 70% yield, brown oil. TLC (petroleum ether/ethyl acetate = 15/1, v/v): R<sub>f</sub> = 0.44. <sup>1</sup>H NMR (400 MHz, CDCl<sub>3</sub>) δ 6.76 (dd, *J* = 8.8, 1.9 Hz, 2H), 6.52 (dd, *J* = 8.8, 1.9 Hz, 2H), 4.38-4.32 (m, 1H), 3.38-3.32 (m, 1H), 1.61-1.50 (m, 2H), 1.28 (dd, *J* = 6.1, 1.8 Hz, 16H), 1.14 (dd, *J* = 6.4, 1.7 Hz, 3H), 0.88 (t, *J* = 6.1 Hz, 3H); <sup>13</sup>C NMR (100 MHz, CDCl<sub>3</sub>) δ 149.6, 142.1, 118.0, 114.4, 71.1, 49.3, 37.2, 31.8, 29.6, 29.3, 26.1, 22.6, 22.2, 20.8, 14.1. HRMS (ESI, m/z): [M+H]<sup>+</sup> Calcd. for C<sub>18</sub>H<sub>31</sub>NO, 278.2484; found, 278.2484.

***N*-(1-(4-bromophenyl)ethyl)-4-isopropoxyaniline (4la)**

129.87 mg, 78% yield, brown oil. TLC (petroleum ether/ethyl acetate = 25/1, v/v): R<sub>f</sub> = 0.25. <sup>1</sup>H NMR (400 MHz, CDCl<sub>3</sub>) δ 7.35-7.33 (m, 2H), 7.17-7.15 (m, 2H), 6.61-6.59 (m, 2H), 6.33-6.31 (m, 2H), 4.29-4.19 (m, 2H), 1.37 (d, *J* = 6.7 Hz, 3H), 1.17 (dd, *J* = 6.1, 1.6 Hz, 6H); <sup>13</sup>C NMR (100 MHz, CDCl<sub>3</sub>) δ 150.0, 144.7, 141.4, 131.7, 127.7, 120.4, 117.7, 114.4, 71.0, 53.8, 25.1, 22.2. HRMS (ESI, m/z): [M+H]<sup>+</sup> Calcd. for C<sub>17</sub>H<sub>20</sub>BrNO, 334.0807; found, 334.0794.

**4-(1-((4-isopropoxyphenyl)amino)ethyl)benzotrile (4ma)**

88.20 mg, 63% yield, brown oil. TLC (petroleum ether/ethyl acetate = 5/1, v/v): R<sub>f</sub> = 0.20. <sup>1</sup>H NMR (400 MHz, CDCl<sub>3</sub>) δ 7.60 (dd, *J* = 8.3, 1.5 Hz, 2H), 7.48 (dd, *J* = 8.3, 1.5 Hz, 2H), 6.68 (dd, *J* = 8.9, 1.5 Hz, 2H), 6.37 (dd, *J* = 8.9, 1.5 Hz, 2H), 4.42 (q, *J* = 6.8 Hz, 1H), 4.34-4.28 (m, 1H), 1.48 (dd, *J* = 6.8, 1.4 Hz, 3H), 1.25 (dd, *J* = 6.2, 1.4 Hz, 6H); <sup>13</sup>C NMR (100 MHz, CDCl<sub>3</sub>) δ 151.3, 150.1, 140.9, 132.5, 126.6, 119.0, 117.6, 114.3, 110.5, 70.9, 54.0, 24.9, 22.1, 22.1. HRMS (ESI, m/z): [M+H]<sup>+</sup> Calcd. for C<sub>18</sub>H<sub>20</sub>N<sub>2</sub>O, 281.1654; found, 228.1020.

***N*-(1-(3, 5-dimethylphenyl)ethyl)-4-isopropoxyaniline (4na)**

111.79 mg, 79% yield, brown oil. TLC (petroleum ether/ethyl acetate = 15/1, v/v): R<sub>f</sub> = 0.33. <sup>1</sup>H NMR (400 MHz, CDCl<sub>3</sub>) δ 6.98 (s, 2H), 6.86 (s, 1H), 6.69 (d, *J* = 8.9 Hz, 2H), 6.46 (d, *J* = 8.9 Hz, 2H), 4.34-4.28 (m, 2H), 2.29 (s, 6H), 1.46 (d, *J* = 6.7 Hz, 3H), 1.25 (d, *J* = 6.1 Hz, 6H); <sup>13</sup>C NMR (100 MHz, CDCl<sub>3</sub>) δ 149.7, 145.6, 142.0,

138.0, 128.5, 123.6, 117.7, 114.3, 71.0, 54.3, 25.1, 22.2, 22.2, 21.4. HRMS (ESI, m/z): [M+H]<sup>+</sup> Calcd. for C<sub>19</sub>H<sub>25</sub>NO, 284.2014; found, 284.2030.

**4-(3-((4-isopropoxyphenyl)amino)butyl)-N,N-dimethylaniline (4oa)**

92.38 mg, 62% yield, brown oil. TLC (petroleum ether/ethyl acetate = 10/1, v/v): R<sub>f</sub> = 0.32. <sup>1</sup>H NMR (400 MHz, CDCl<sub>3</sub>) δ 7.05 (d, *J* = 6.8 Hz, 2H), 6.74 (d, *J* = 7.0 Hz, 2H), 6.68 (d, *J* = 6.8 Hz, 2H), 6.48 (d, *J* = 7.0 Hz, 2H), 4.36-4.31 (m, 1H), 3.40-3.34 (m, 1H), 2.89 (s, 6H), 2.65-2.58 (m, 2H), 1.86-1.77 (m, 1H), 1.72-1.62 (m, 1H), 1.27 (d, *J* = 4.1 Hz, 6H), 1.16 (d, *J* = 4.4 Hz, 3H); <sup>13</sup>C NMR (100 MHz, CDCl<sub>3</sub>) δ 149.6, 148.9, 142.0, 130.1, 128.9, 117.9, 114.5, 112.9, 71.0, 48.7, 40.8, 39.0, 31.3, 22.1, 20.8. HRMS (ESI, m/z): [M+H]<sup>+</sup> Calcd. for C<sub>19</sub>H<sub>26</sub>N<sub>2</sub>NaO, 321.1943; found, 321.1958.

**4-isopropoxy-N-(1-phenylbutyl)aniline (4pa)**

106.13 mg, 75% yield, brown oil. TLC (petroleum ether/ethyl acetate = 20/1, v/v): R<sub>f</sub> = 0.44. <sup>1</sup>H NMR (400 MHz, CDCl<sub>3</sub>) δ 7.34-7.27 (m, 4H), 7.22-7.18 (m, 1H), 6.66 (d, *J* = 8.9 Hz, 2H), 6.43 (d, *J* = 9.0 Hz, 2H), 4.32-4.20 (m, 2H), 1.80-1.65 (m, 2H), 1.45-1.31 (m, 2H), 1.23 (d, *J* = 6.1 Hz, 6H), 0.91 (t, *J* = 7.4 Hz, 3H); <sup>13</sup>C NMR (100 MHz, CDCl<sub>3</sub>) δ 149.7, 144.5, 141.9, 128.4, 126.7, 126.4, 117.7, 114.2, 70.9, 58.7, 41.1, 22.1, 22.1, 19.5, 13.9. HRMS (ESI, m/z): [M+H]<sup>+</sup> Calcd. for C<sub>19</sub>H<sub>25</sub>NO, 284.2014; found, 284.1995.

**4-isopropoxy-N-(nonan-2-yl)aniline (4qa)**

41.18 mg, 27% yield, brown oil. TLC (petroleum ether/ethyl acetate = 20/1, v/v): R<sub>f</sub> = 0.18. <sup>1</sup>H NMR (400 MHz, CDCl<sub>3</sub>) δ 7.81-7.78 (m, 4H), 7.51-7.40 (m, 3H), 6.66 (d, *J* = 8.6 Hz, 2H), 6.52 (d, *J* = 8.5 Hz, 2H), 4.55 (q, *J* = 6.7 Hz, 1H), 4.29-4.24 (m, 1H), 1.55 (d, *J* = 6.7 Hz, 3H), 1.22 (d, *J* = 6.1 Hz, 6H); <sup>13</sup>C NMR (100 MHz, CDCl<sub>3</sub>) δ 149.8, 143.1, 141.7, 133.5, 132.7, 128.4, 127.8, 127.6, 125.9, 125.4, 124.4, 124.2, 117.7, 114.4, 70.9, 54.4, 25.2, 22.1. HRMS (ESI, m/z): [M+H]<sup>+</sup> Calcd. for C<sub>19</sub>H<sub>25</sub>NO, 306.1858; found, 306.1844.

**N-(4-phenylbutan-2-yl)-2,3-dihydrobenzofuran-5-amine (4ac)**

96.12 mg, 72% yield, brown oil. TLC (petroleum ether/ethyl acetate = 20/1, v/v): R<sub>f</sub> = 0.28. <sup>1</sup>H NMR (400 MHz, CDCl<sub>3</sub>) δ 7.29-7.25 (m, 2H), 7.21-7.16 (m, 3H), 6.61 (d, *J* = 8.4 Hz, 1H), 6.44 (d, *J* = 2.4 Hz, 1H), 6.32 (dd, *J* = 8.4, 2.5 Hz, 1H), 4.47 (t, *J* = 8.5



Hz, 2H), 3.39-3.33 (m, 1H), 3.10 (t,  $J = 8.5$  Hz, 2H), 2.71 (t,  $J = 8.3$  Hz, 2H), 1.90-1.81 (m, 1H), 1.76-1.67 (m, 1H);  $^{13}\text{C}$  NMR (100 MHz,  $\text{CDCl}_3$ )  $\delta$  152.4, 142.2, 141.9, 128.5, 128.4, 127.8, 125.9, 113.4, 111.2, 109.5, 70.9, 49.3, 38.9, 32.6, 30.5, 20.9. HRMS (ESI,  $m/z$ ):  $[\text{M}+\text{H}]^+$  Calcd. for  $\text{C}_{18}\text{H}_{21}\text{NO}$ , 268.1701; found, 268.1704.

#### **4-ethyl-*N*-(4-phenylbutan-2-yl)aniline (4ad)**

90.6 mg, 73% yield, red oil. TLC (petroleum ether/ethyl acetate = 50/1, v/v):  $R_f = 0.34$ .  $^1\text{H}$  NMR (400 MHz,  $\text{CDCl}_3$ )  $\delta$  7.28-7.24 (m, 2H), 7.18-7.15 (m, 3H), 6.99 - 6.96 (m, 2H), 6.48-6.45 (m, 2H), 3.47 - 3.49 (m, 1H), 3.05 (s, 1H), 2.69 (t,  $J = 7.9$  Hz, 2H), 2.52 (q,  $J = 7.6$  Hz, 2H), 1.88-1.79 (m, 1H), 1.76 - 1.67 (m, 1H), 1.20-1.16 (m, 6H);  $^{13}\text{C}$  NMR (100 MHz,  $\text{CDCl}_3$ )  $\delta$  145.4, 142.0, 132.6, 128.5, 128.3, 128.3, 125.7, 113.2, 48.0, 38.8, 32.4, 27.8, 20.8, 15.9. HRMS (ESI,  $m/z$ ):  $[\text{M}+\text{H}]^+$  Calcd. for  $\text{C}_{18}\text{H}_{23}\text{N}$ , 254.1909; found, 254.1889.

#### **4-chloro-*N*-(4-phenylbutan-2-yl)aniline (4ae)** <sup>[1]</sup>

124.5 mg, 92% yield, yellow oil. TLC (petroleum ether/ethyl acetate = 20/1, v/v):  $R_f = 0.24$ .  $^1\text{H}$  NMR (400 MHz,  $\text{CDCl}_3$ )  $\delta$  7.26 (t,  $J = 7.4$  Hz, 2H), 7.19-7.13 (m, 3H), 7.07-7.04 (m, 2H), 6.39-6.37 (m, 2H), 3.42 - 3.34 (m, 1H), 2.67 (t,  $J = 8.0$  Hz, 3H), 1.86 - 1.67 (m, 2H), 1.16 (d,  $J = 6.4$  Hz, 3H);  $^{13}\text{C}$  NMR (100 MHz,  $\text{CDCl}_3$ )  $\delta$  145.9, 141.6, 128.9, 128.3, 125.8, 121.1, 114.0, 47.8, 38.4, 32.2, 20.5.

#### **methyl 4-((4-phenylbutan-2-yl)amino)benzoate (4af)** <sup>[1]</sup>

117.45mg, 83% yield, yellow oil. TLC (petroleum ether/ethyl acetate = 20/1, v/v):  $R_f = 0.22$ .  $^1\text{H}$  NMR (400 MHz,  $\text{CDCl}_3$ )  $\delta$  7.83 (d,  $J = 8.8$  Hz, 2H), 7.27 (t,  $J = 7.3$  Hz, 2H), 7.19 (d,  $J = 8.6$  Hz, 1H), 7.15 (d,  $J = 8.3$  Hz, 2H), 6.44 (d,  $J = 8.8$  Hz, 2H), 4.02 (d,  $J = 8.9$  Hz, 1H), 3.83 (s, 3H), 3.55 - 3.49 (m, 1H), 2.69 (t,  $J = 7.8$  Hz, 2H), 1.91 - 1.73 (m, 2H), 1.21 (d,  $J = 6.4$  Hz, 3H);  $^{13}\text{C}$  NMR (100 MHz,  $\text{CDCl}_3$ )  $\delta$  167.3, 151.2, 141.4, 131.5, 128.4, 128.3, 125.9, 117.6, 111.5, 51.4, 47.3, 38.4, 32.2, 20.5.

#### **3-((4-phenylbutan-2-yl)amino)phenol (4ag)**

108.5 mg, 90% yield, brown oil. TLC (petroleum ether/ethyl acetate = 20/1, v/v):  $R_f = 0.17$ .  $^1\text{H}$  NMR (400 MHz,  $\text{CDCl}_3$ )  $\delta$  7.31-7.16 (m, 5H), 7.01-6.94 (m, 1H), 6.15-6.10 (m, 2H), 5.94 (t,  $J = 4.4$  Hz, 1H), 3.45-3.47 (m, 1H), 2.69 (t,  $J = 7.8$  Hz, 2H), 1.91-1.80 (m, 1H), 1.77-1.68 (m, 1H), 1.18 (dd,  $J = 6.4, 2.8$  Hz, 3H);  $^{13}\text{C}$  NMR (100 MHz,

CDCl<sub>3</sub>)  $\delta$  156.7, 149.0, 141.9, 130.2, 128.5, 128.4, 125.8, 106.3, 104.0, 100.0, 47.9, 38.6, 32.4, 20.7. HRMS (ESI, m/z): [M+H]<sup>+</sup> Calcd. for C<sub>16</sub>H<sub>19</sub>NO, 242.1545; found, 242.1547.

#### **7-((4-phenylbutan-2-yl)amino)-1, 2, 3, 4-tetrahydronaphthalen-1-ol (4ah)**

89.5 mg, 80% yield, red oil. TLC (petroleum ether/ethyl acetate = 20/1, v/v): R<sub>f</sub> = 0.22. <sup>1</sup>H NMR (400 MHz, CDCl<sub>3</sub>)  $\delta$  7.28-7.24 (m, 2H), 7.18-7.15 (m, 3H), 6.86 (d, *J* = 8.3 Hz, 1H), 6.59 - 6.57 (m, 1H), 6.40 (dd, *J* = 8.3, 2.8 Hz, 1H), 4.61 (t, *J* = 5.1 Hz, 1H), 3.49-3.41 (m, 1H), 2.67 (dt, *J* = 14.1, 6.8 Hz, 3H), 2.60-2.53 (m, 1H), 1.94-1.79 (m, 4H), 1.74-1.64 (m, 2H), 1.17 (dd, *J* = 6.3, 1.9 Hz, 3H); <sup>13</sup>C NMR (100 MHz, CDCl<sub>3</sub>)  $\delta$  145.7 (d, *J* = 1.4 Hz), 141.9 (d, *J* = 1.6 Hz), 139.5, 129.6, 128.3, 128.2, 125.7, 125.3, 113.2, 112.5, 68.3 (d, *J* = 2.3 Hz), 47.9 (d, *J* = 2.5 Hz), 38.7 (d, *J* = 9.6 Hz), 32.3 (dd, *J* = 5.2, 2.7 Hz), 28.2, 20.7 (d, *J* = 4.2 Hz), 19.2 (d, *J* = 2.0 Hz). HRMS (ESI, m/z): [M+Na]<sup>+</sup> Calcd. for C<sub>20</sub>H<sub>25</sub>NONa, 318.1834, found, 318.1823.

#### **4-methyl-N-(4-phenylbutan-2-yl)aniline (4ai)<sup>[1]</sup>**

112.4 mg, 94% yield, red oil. TLC (petroleum ether/ethyl acetate = 20/1, v/v): R<sub>f</sub> = 0.27. <sup>1</sup>H NMR (400 MHz, CDCl<sub>3</sub>)  $\delta$  7.27-7.23 (m, 2H), 7.15 (d, *J* = 6.0 Hz, 3H), 6.94 (d, *J* = 6.3 Hz, 2H), 6.44 (d, *J* = 6.1 Hz, 2H), 3.41 (qt, *J* = 6.4, 3.3 Hz, 1H), 3.09 (s, 1H), 2.68 (t, *J* = 6.8 Hz, 2H), 2.21 (s, 3H), 1.87-1.78 (m, 1H), 1.75-1.65 (m, 1H), 1.16 (dd, *J* = 6.3, 2.4 Hz, 3H); <sup>13</sup>C NMR (100 MHz, CDCl<sub>3</sub>)  $\delta$  145.1, 141.9, 129.6, 128.3, 128.2, 125.9, 125.7, 113.3, 48.0, 38.7, 32.4, 20.7, 20.3.

## **H. References**

- [1] (a) Jang, M.; Lim, T.; Park, B. Y.; Han, M. S. *J. Org. Chem.* **2022**, *87*, 910.; (b) Ouyang, L.; Xia, Y.; Liao, J.; Luo, R. *Eur. J. Org. Chem.* **2020**, *2020*, 6387.; (c) Popov, K. K.; Campbell, J. L.; Kysilka, O.; Hosek, J.; Davies, C. D.; Pour, M.; Kocovsky, P. *J. Org. Chem.* **2021**, *87*, 920.; (d) Cosgrove, S. C.; Thompson, M. P.; Ahmed, S. T.; Parmeggiani, F.; Turner, N. J. *Angew. Chem. Int. Ed.* **2020**, *59*, 18156.

# I. NMR Spectra of New Compounds

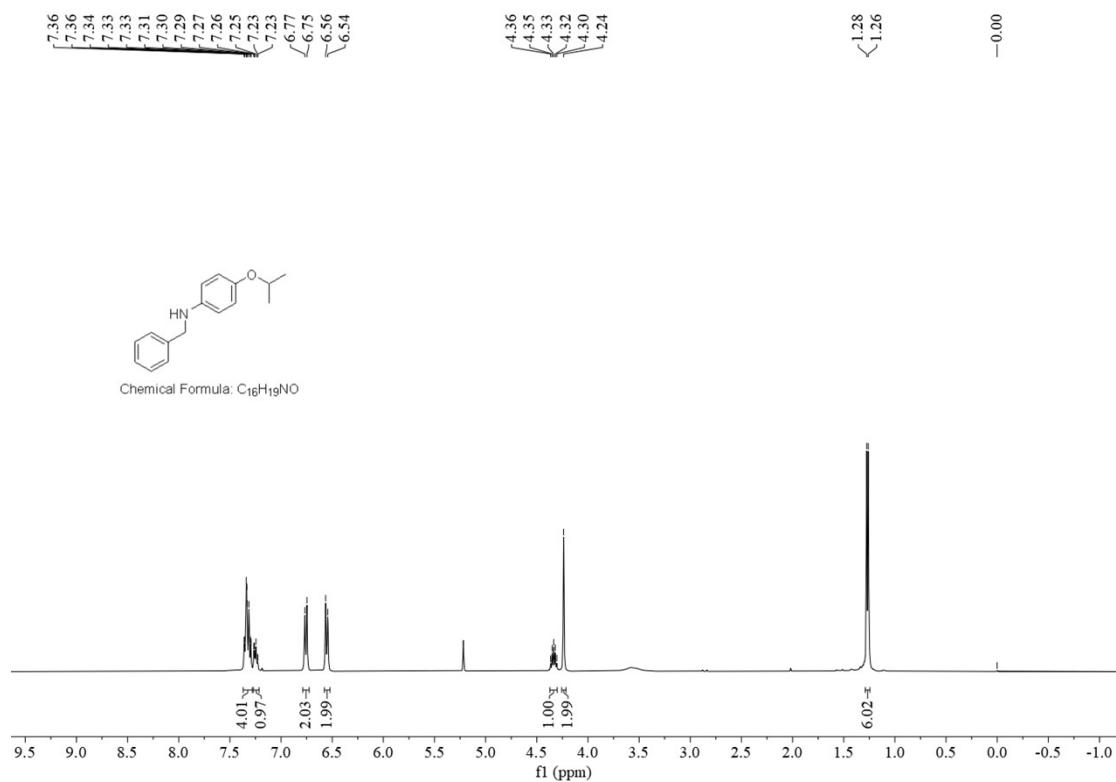

$^1H$  NMR Spectrum of **3aa** in  $CDCl_3$  at 400 MHz

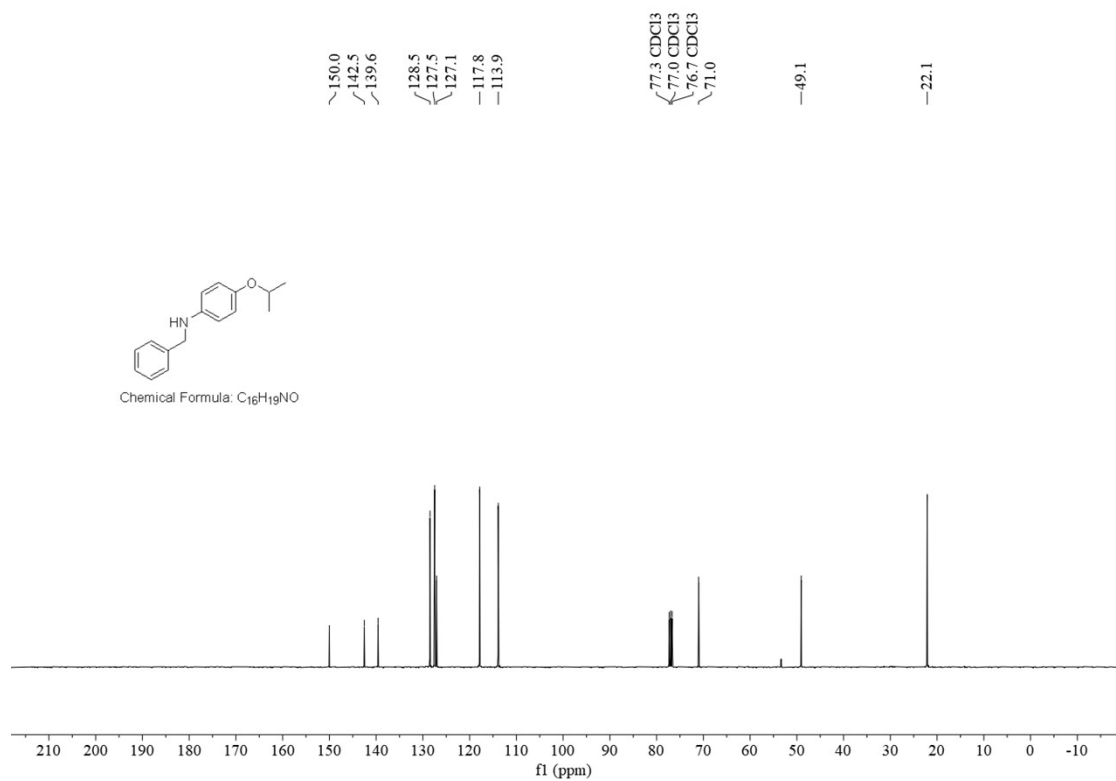

$^{13}C \{^1H\}$  NMR Spectrum of **3aa** in  $CDCl_3$  at 100 MHz

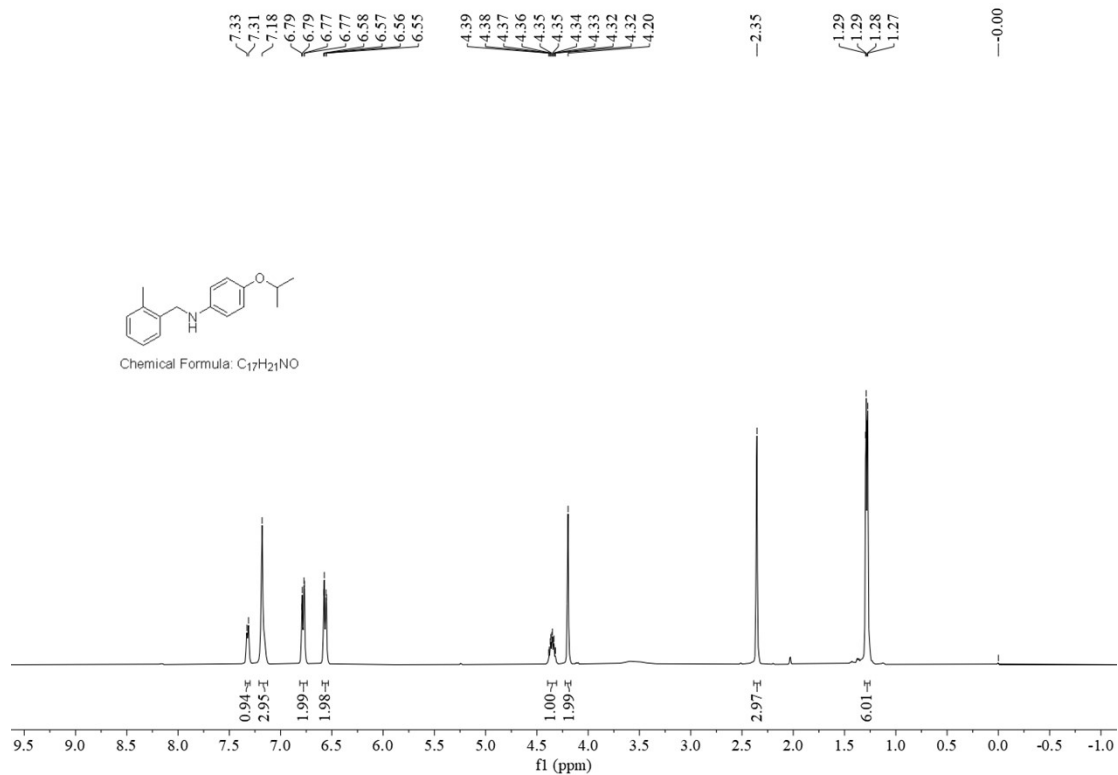

<sup>1</sup>H NMR Spectrum of **3ba** in CDCl<sub>3</sub> at 400 MHz

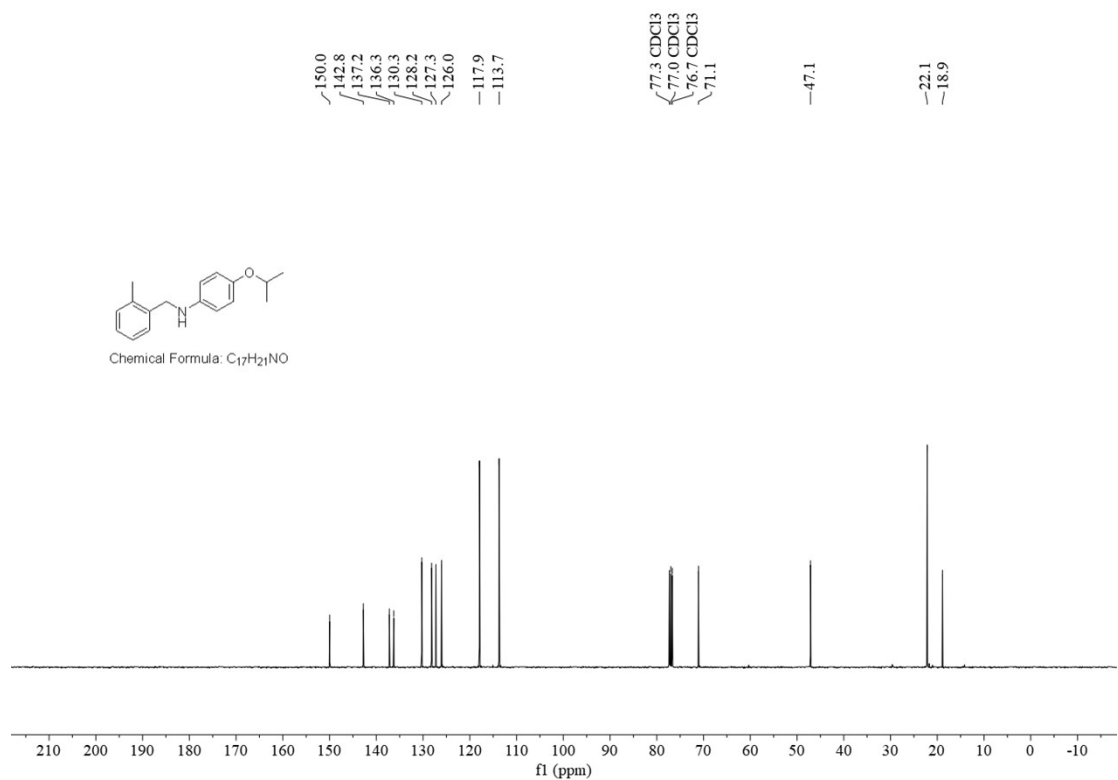

<sup>13</sup>C{<sup>1</sup>H} NMR Spectrum of **3ba** in CDCl<sub>3</sub> at 100 MHz

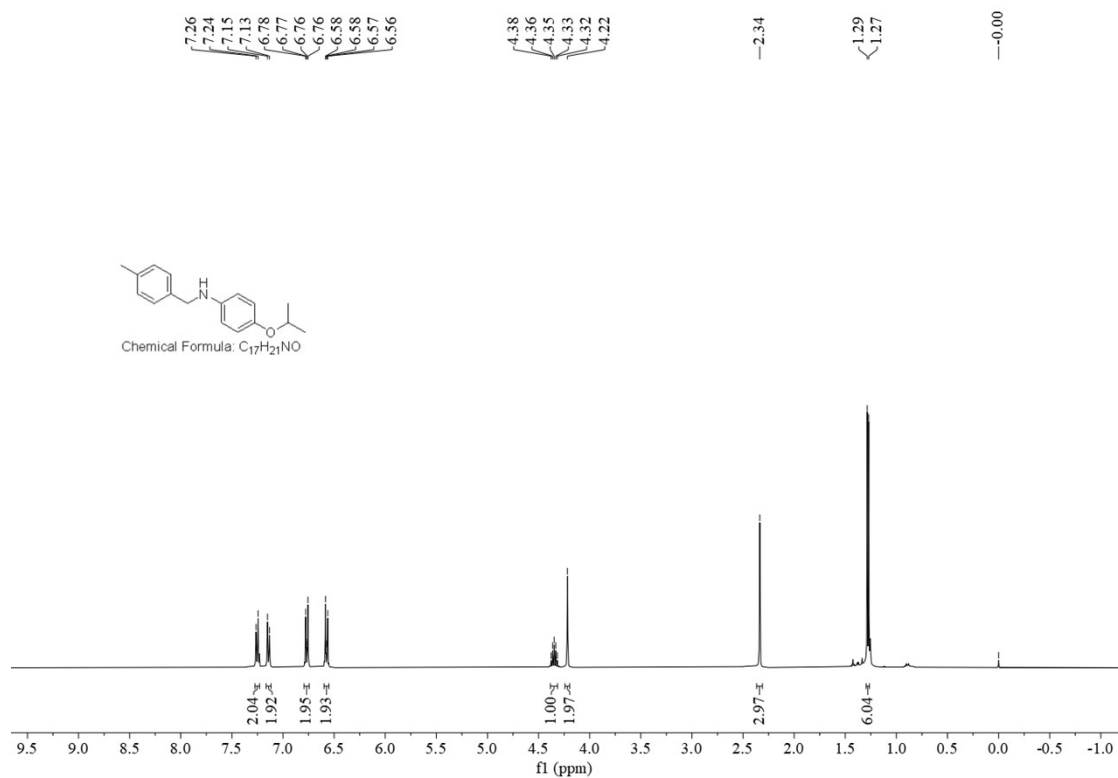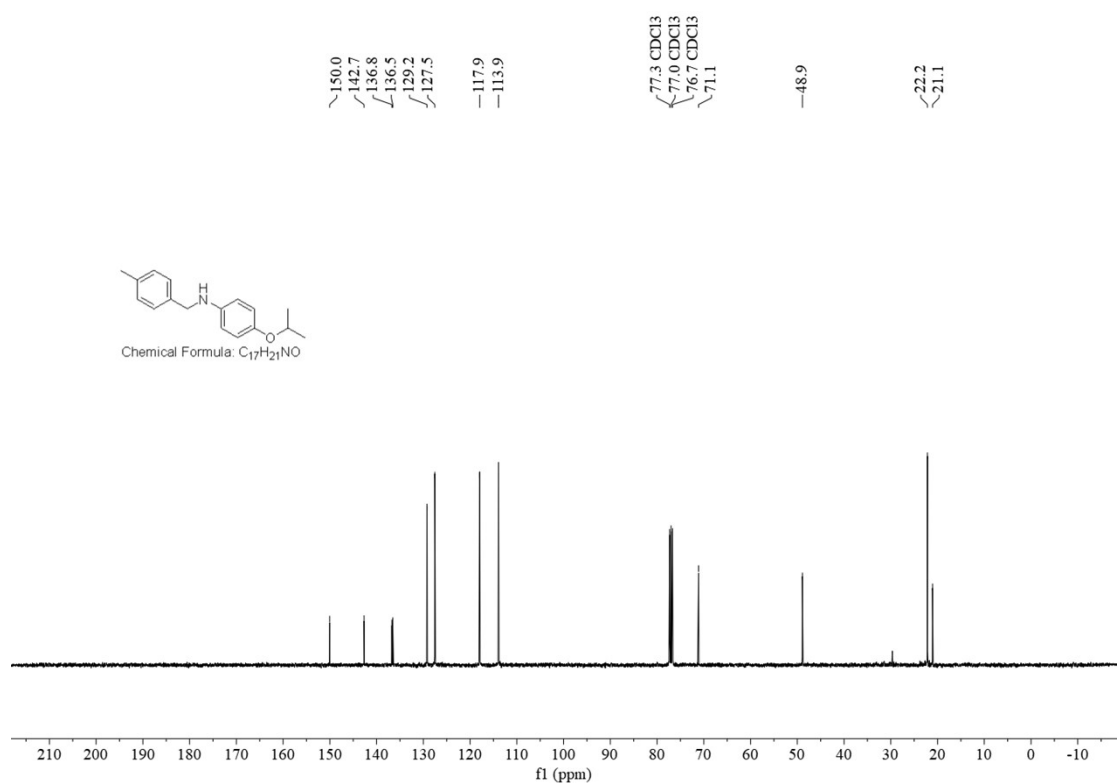

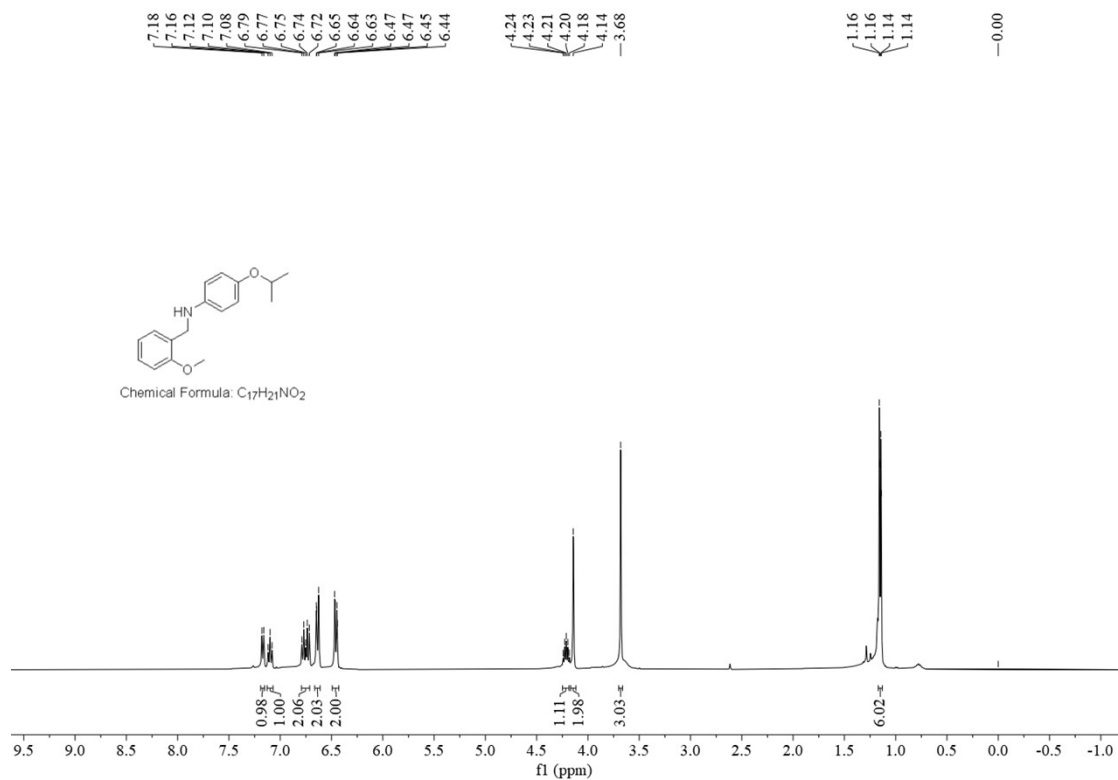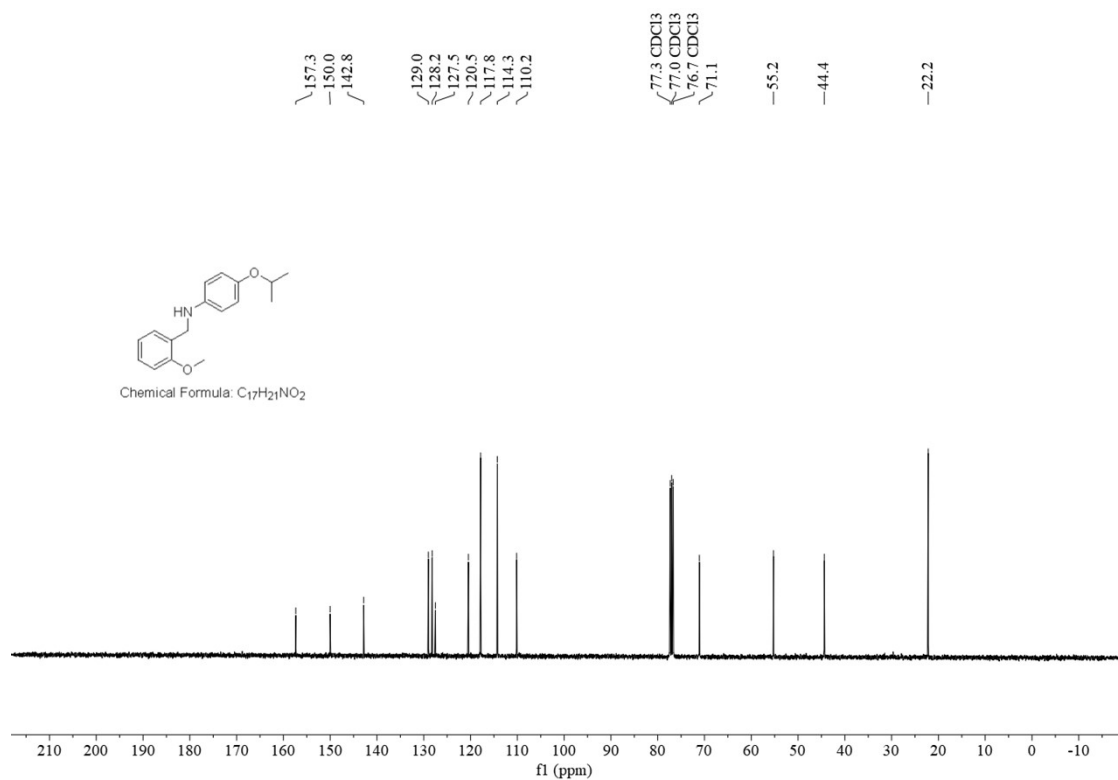

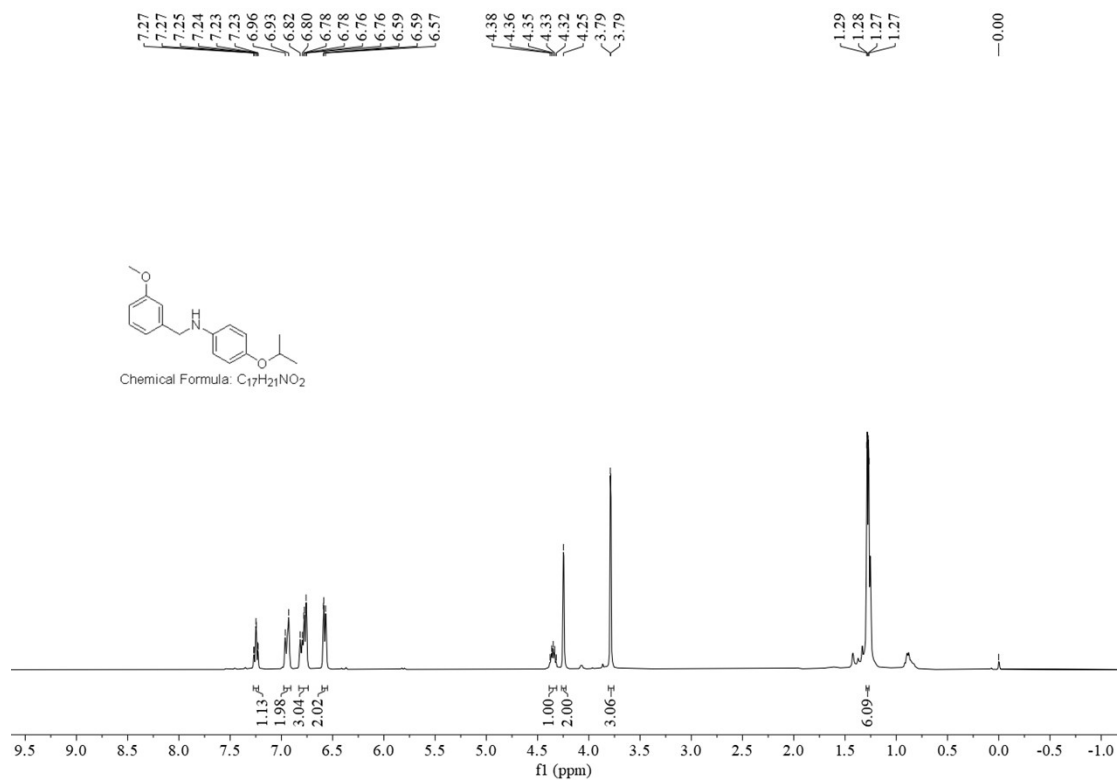

$^1H$  NMR Spectrum of **3ea** in  $CDCl_3$  at 400 MHz

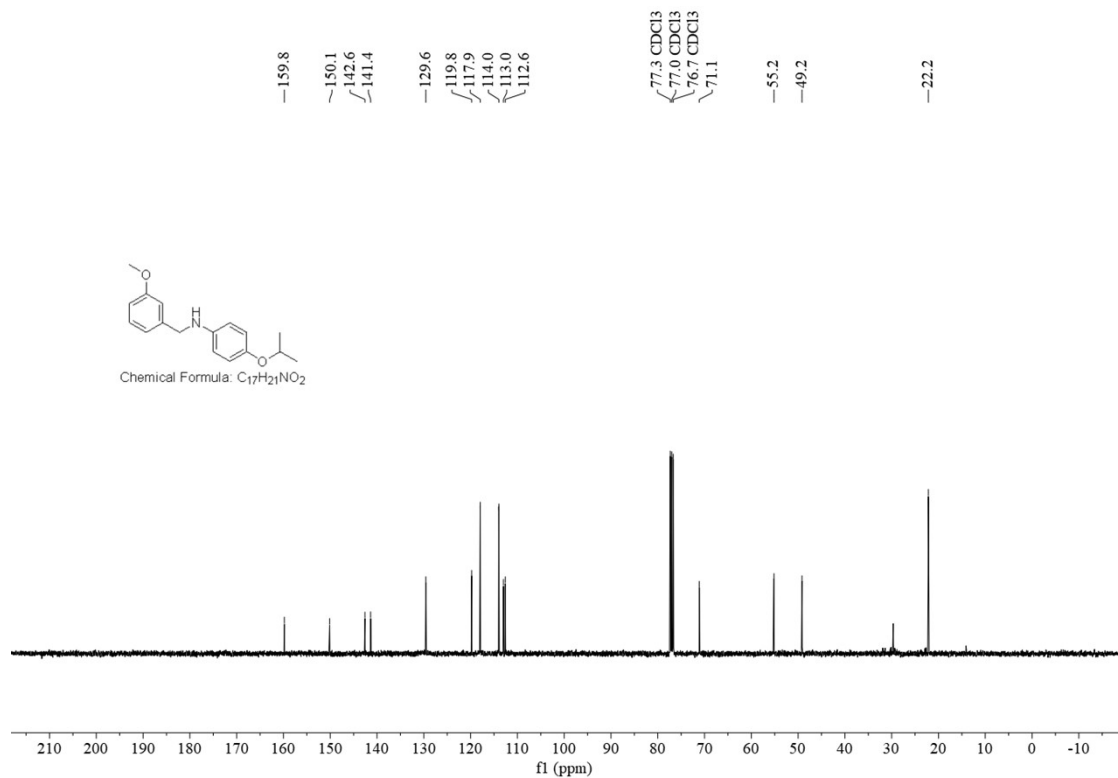

$^{13}C\{^1H\}$  NMR Spectrum of **3ea** in  $CDCl_3$  at 100 MHz

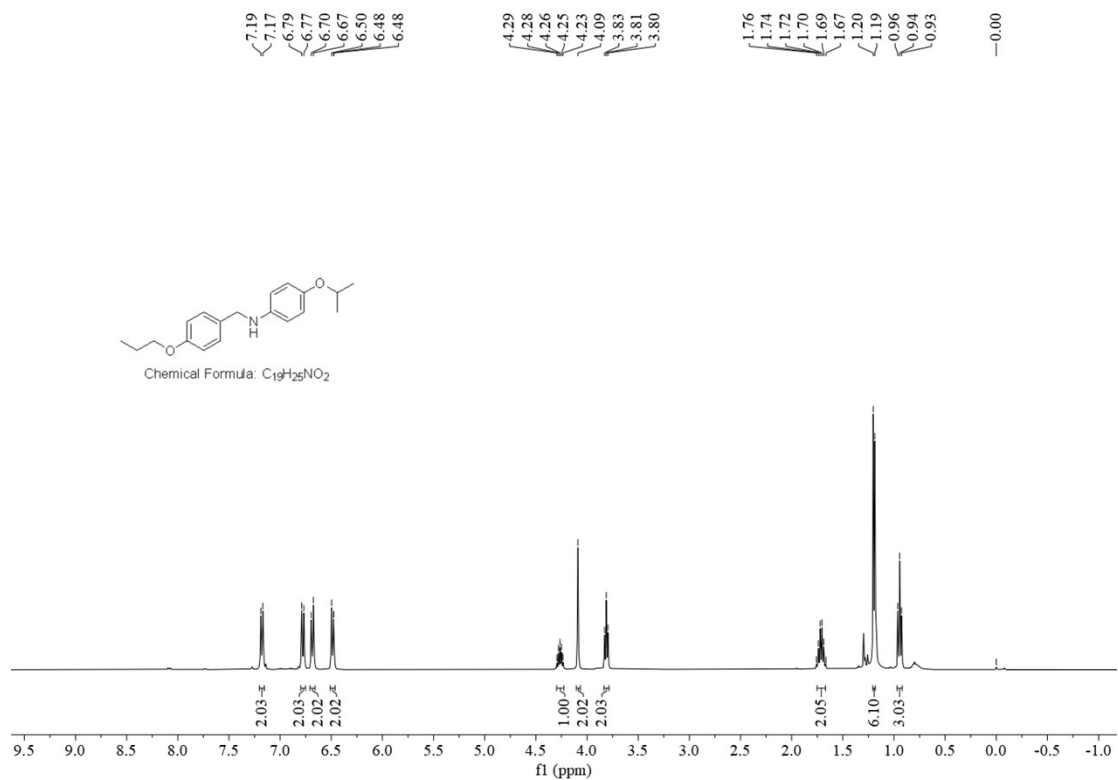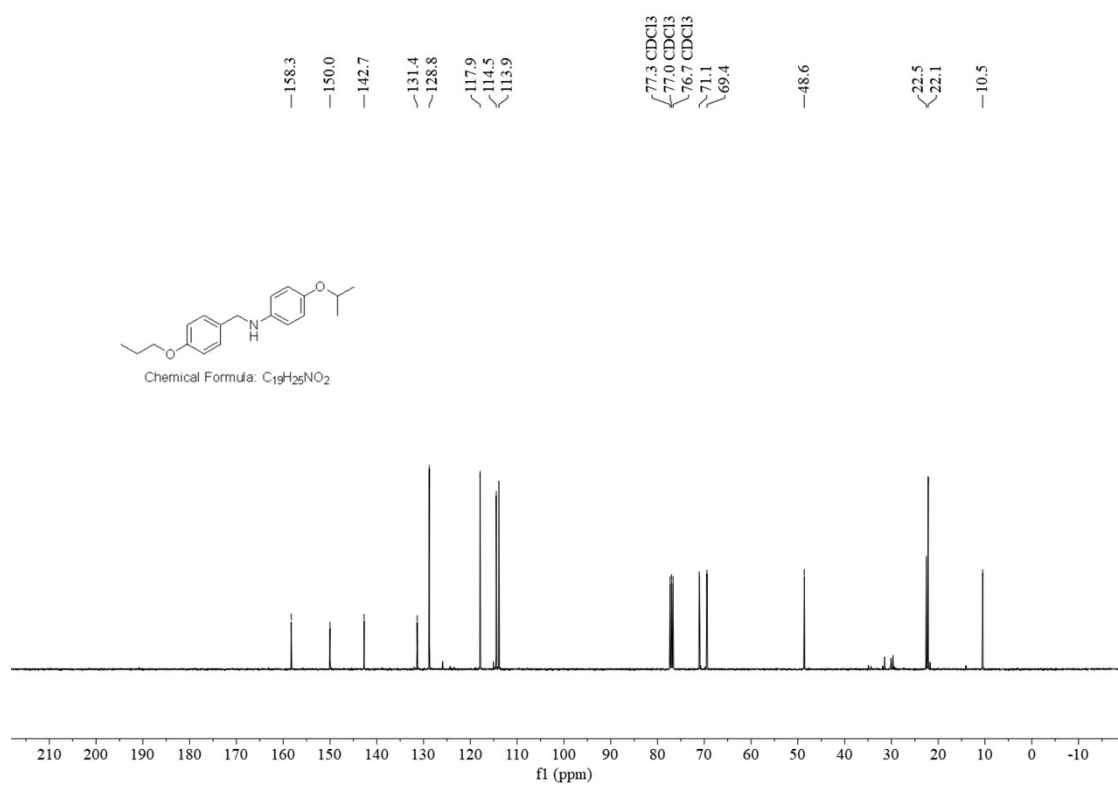



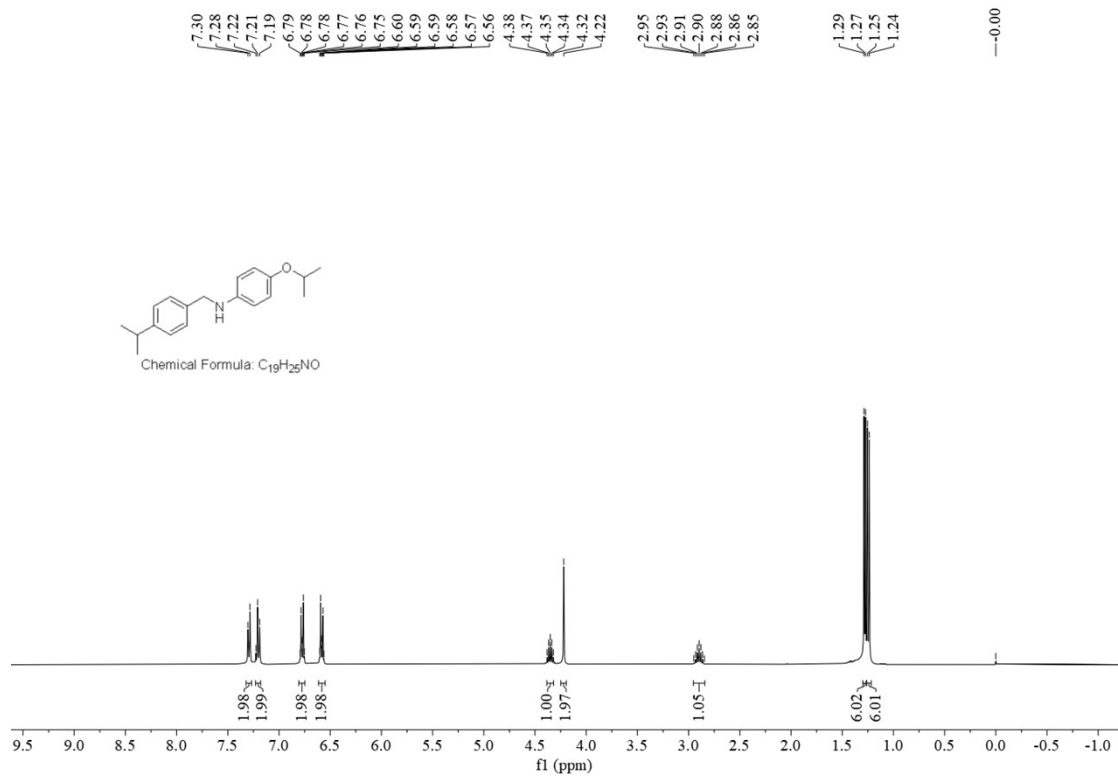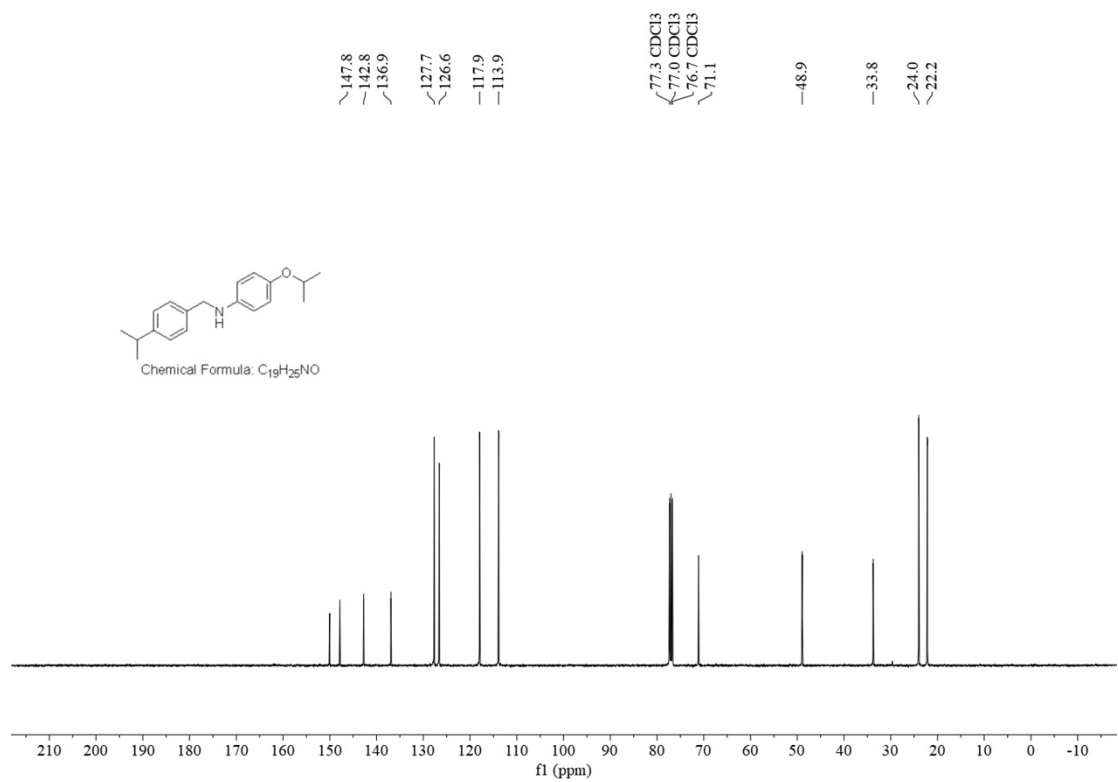

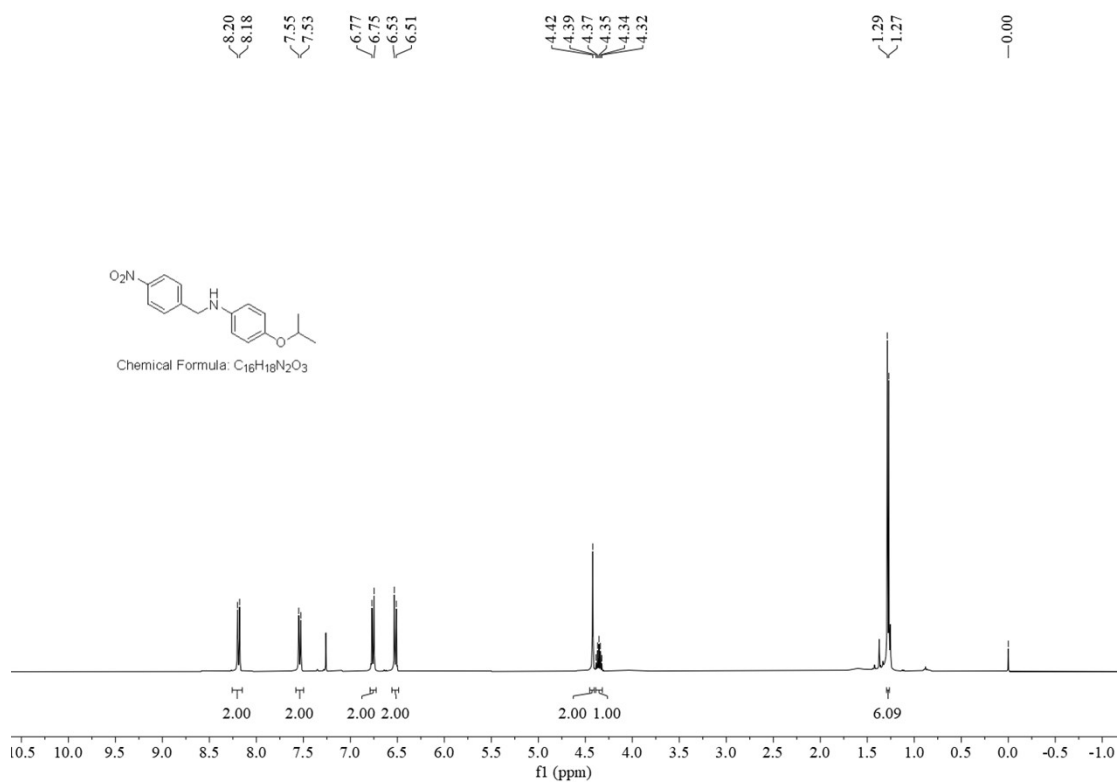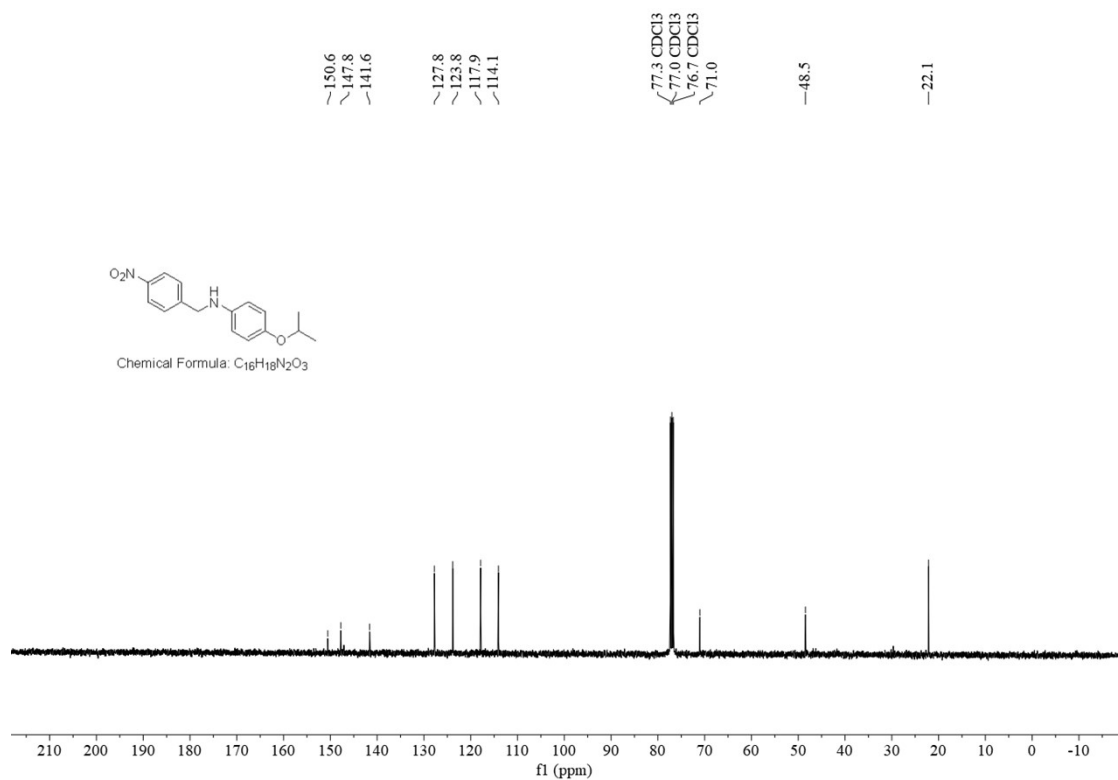

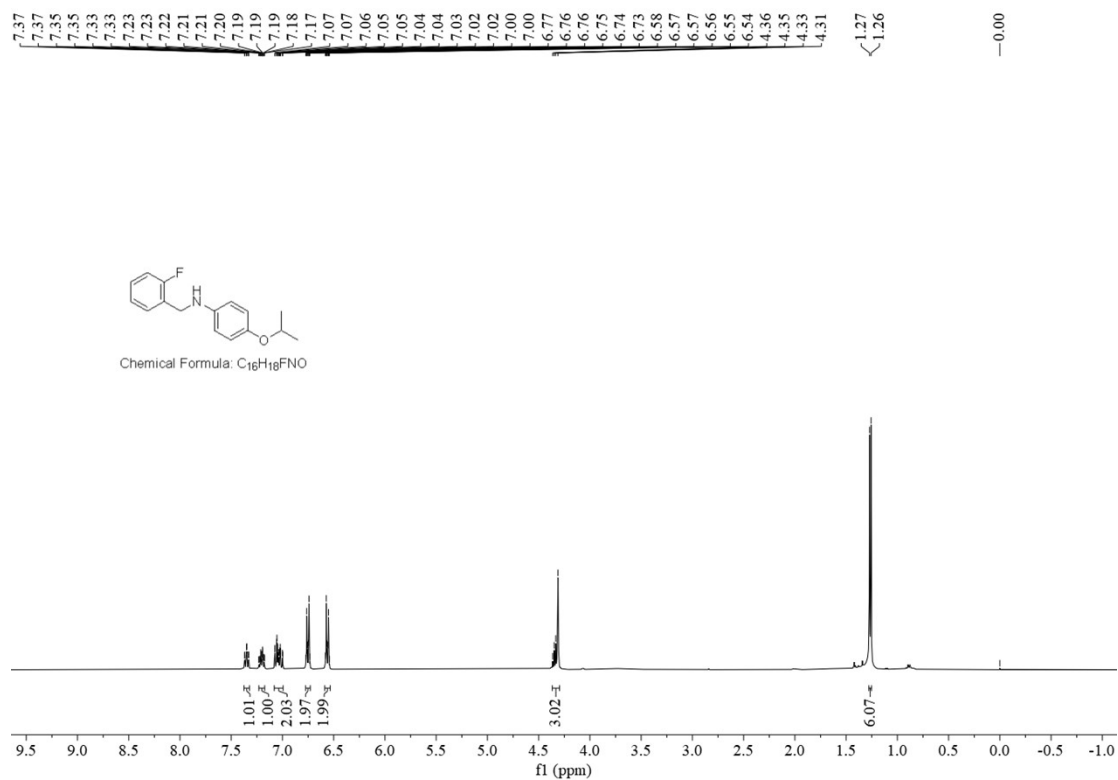

$^1H$  NMR Spectrum of **3ia** in  $CDCl_3$  at 400 MHz

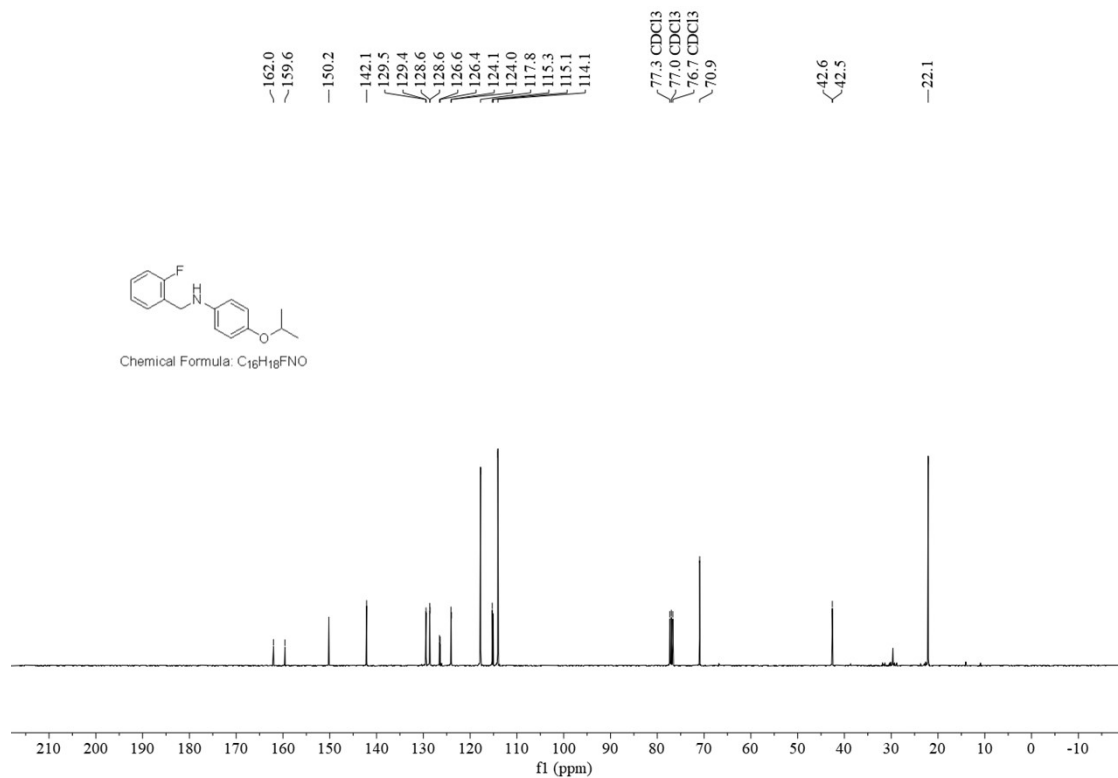

$^{13}C\{^1H\}$  NMR Spectrum of **3ia** in  $CDCl_3$  at 100 MHz

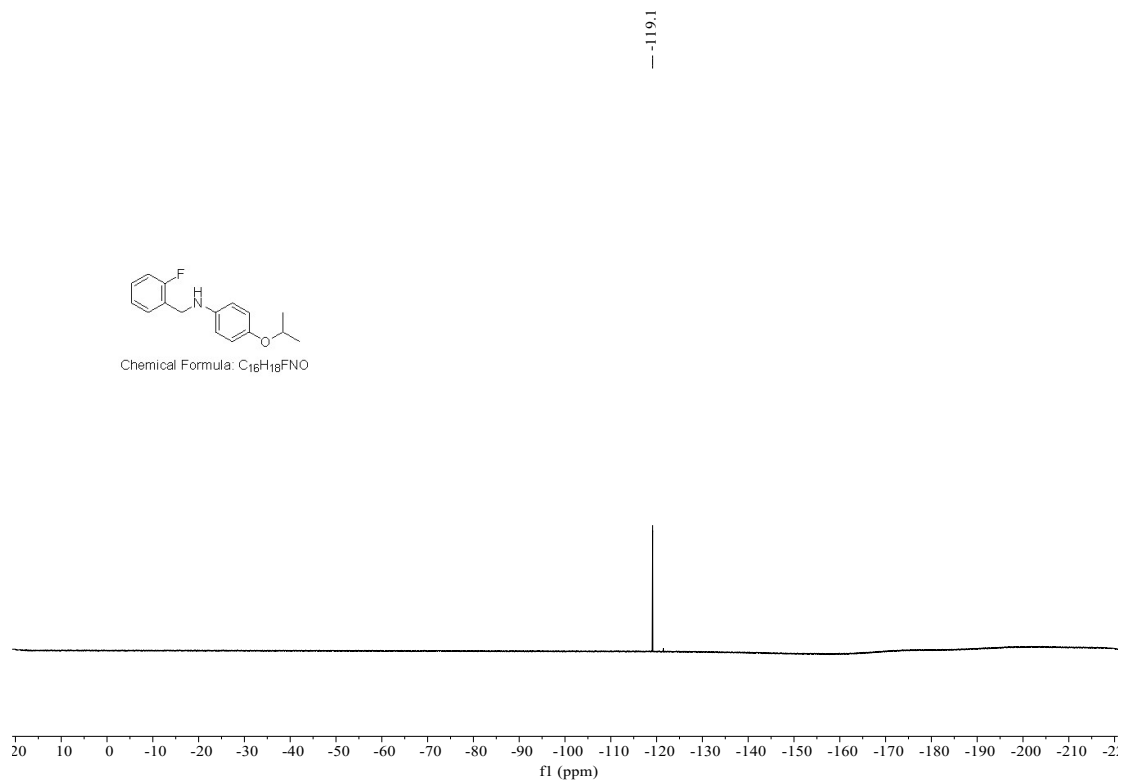

<sup>19</sup>F NMR Spectrum of **3ia** in CDCl<sub>3</sub> at 377 MHz

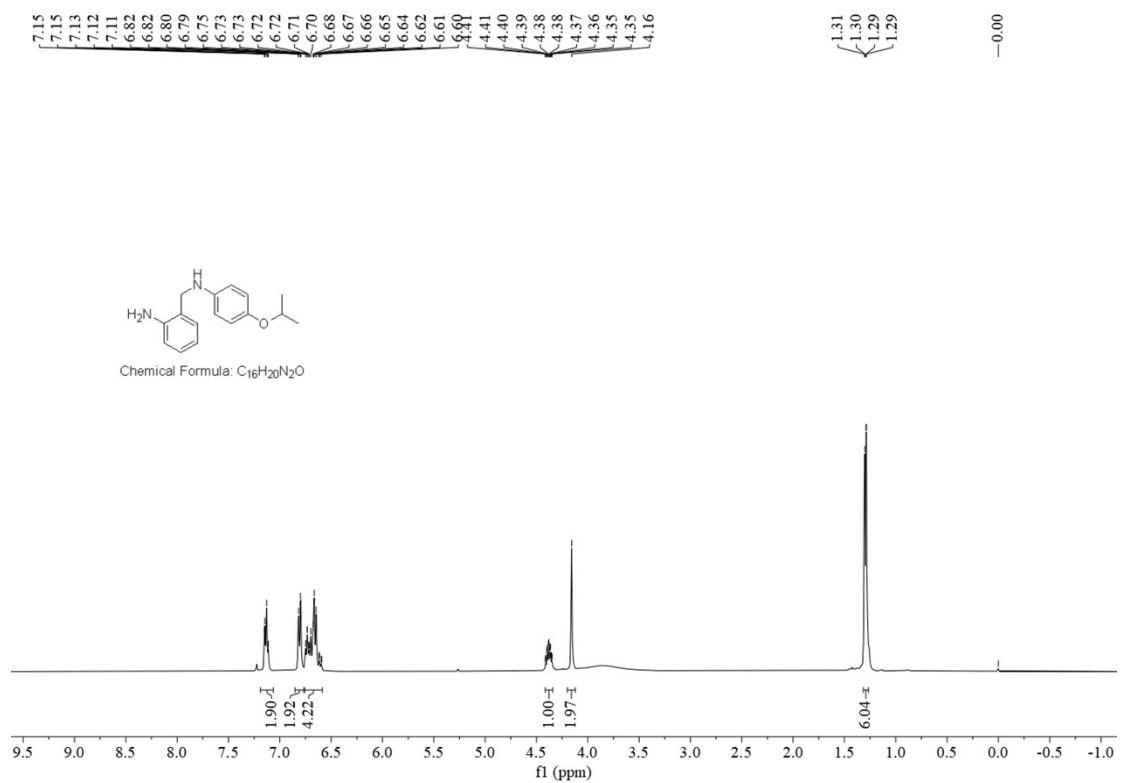

<sup>1</sup>H NMR Spectrum of **3ja** in CDCl<sub>3</sub> at 400 MHz

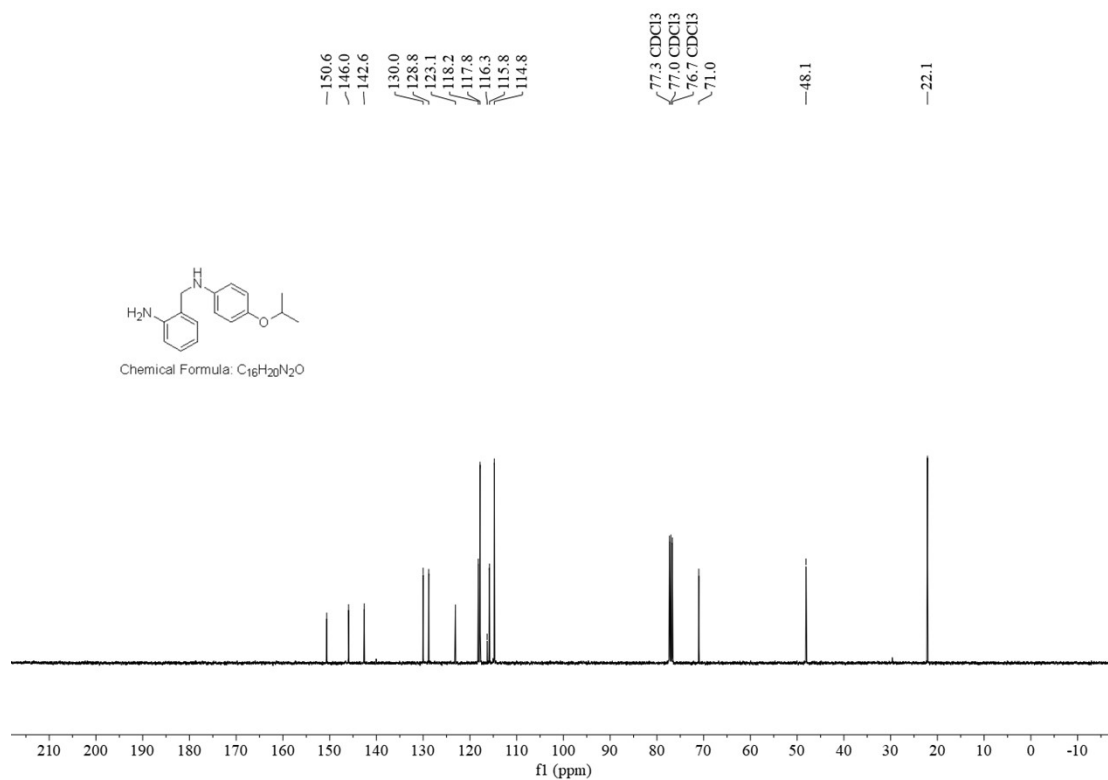

$^{13}C\{^1H\}$  NMR Spectrum of **3ja** in  $CDCl_3$  at 100 MHz

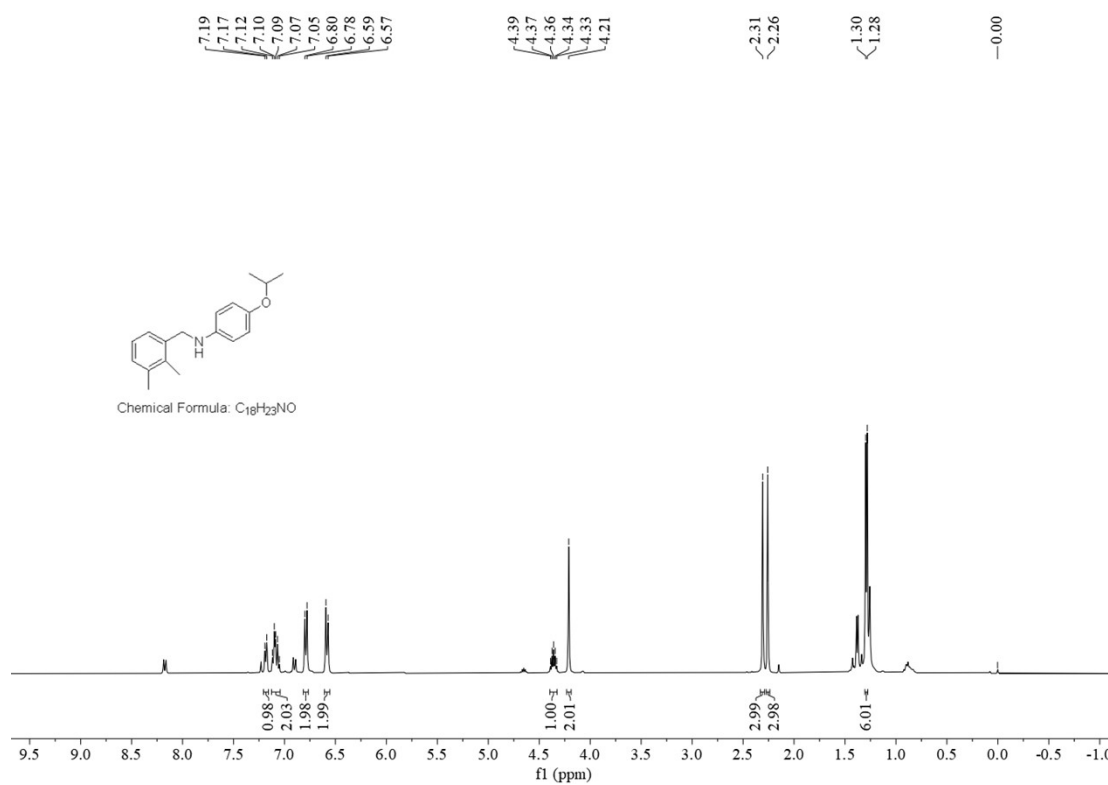

$^1H$  NMR Spectrum of **3ka** in  $CDCl_3$  at 400 MHz

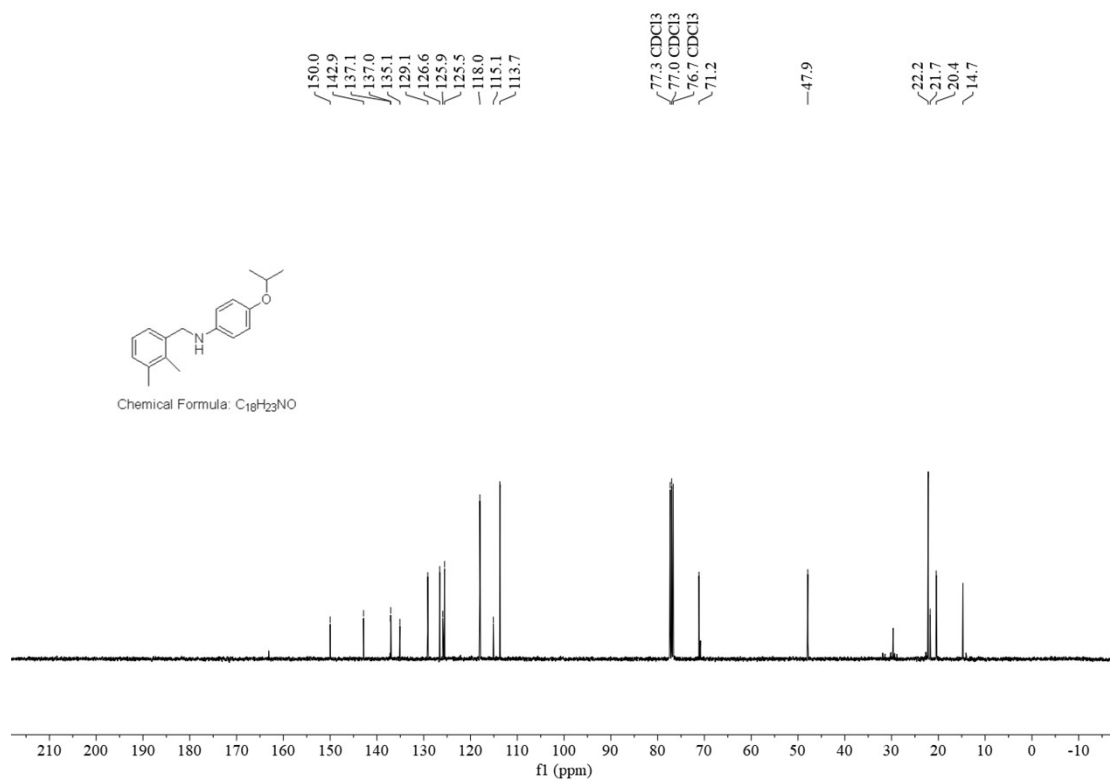

<sup>13</sup>C{<sup>1</sup>H} NMR Spectrum of **3ka** in CDCl<sub>3</sub> at 100 MHz

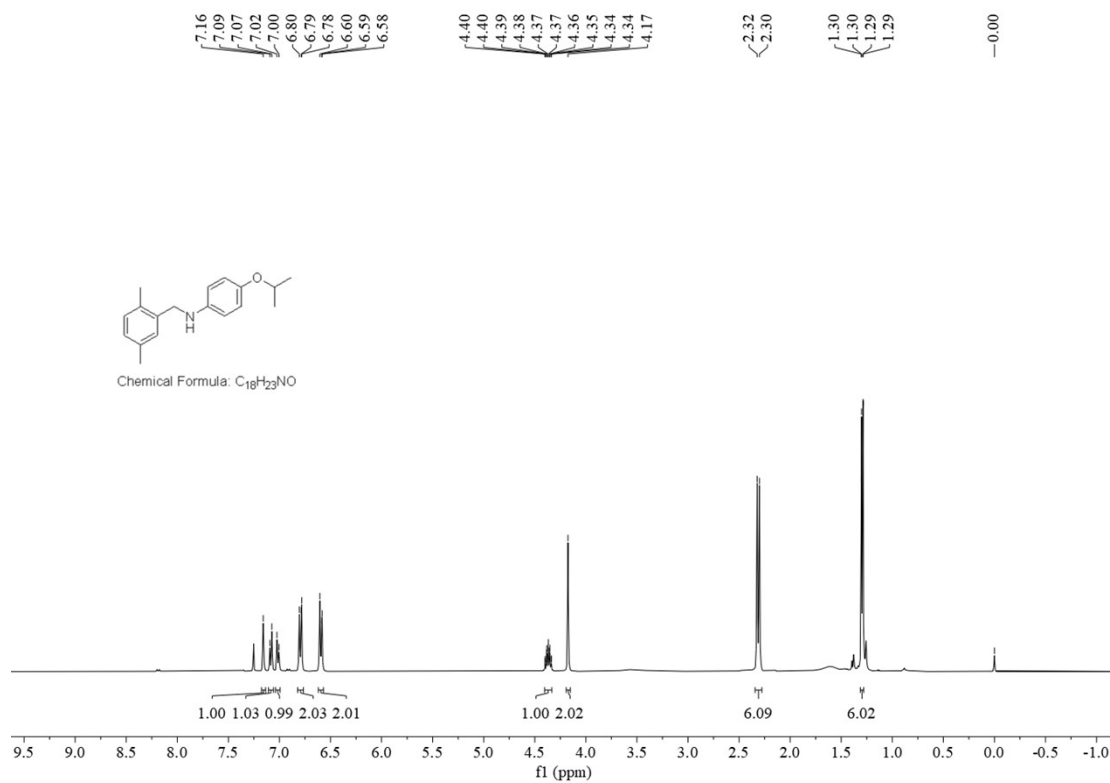

<sup>1</sup>H NMR Spectrum of **3la** in CDCl<sub>3</sub> at 400 MHz

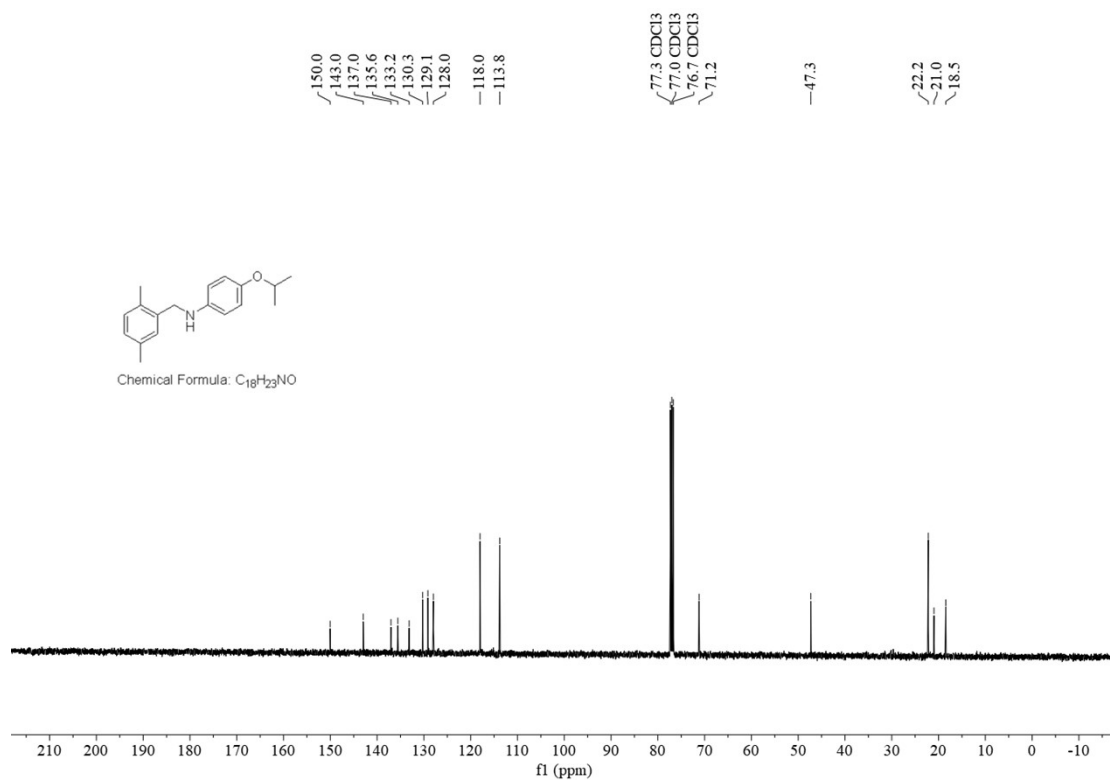

<sup>13</sup>C{<sup>1</sup>H} NMR Spectrum of **3la** in CDCl<sub>3</sub> at 100 MHz

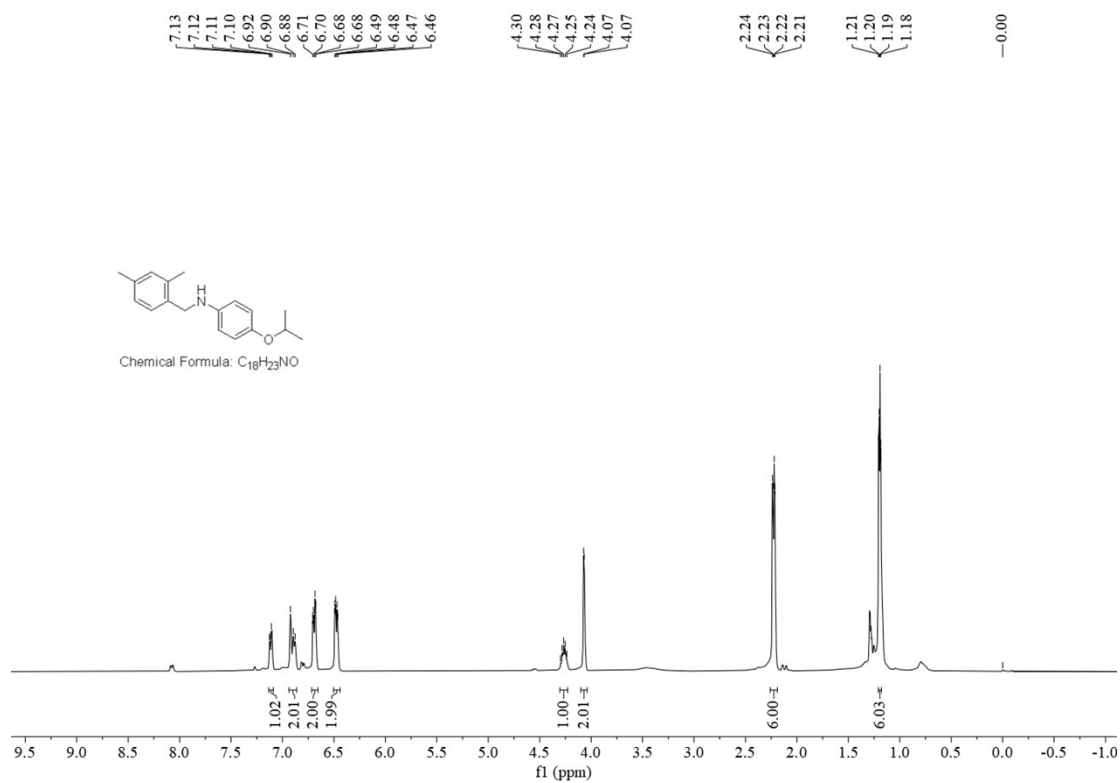

<sup>1</sup>H NMR Spectrum of **3ma** in CDCl<sub>3</sub> at 400 MHz

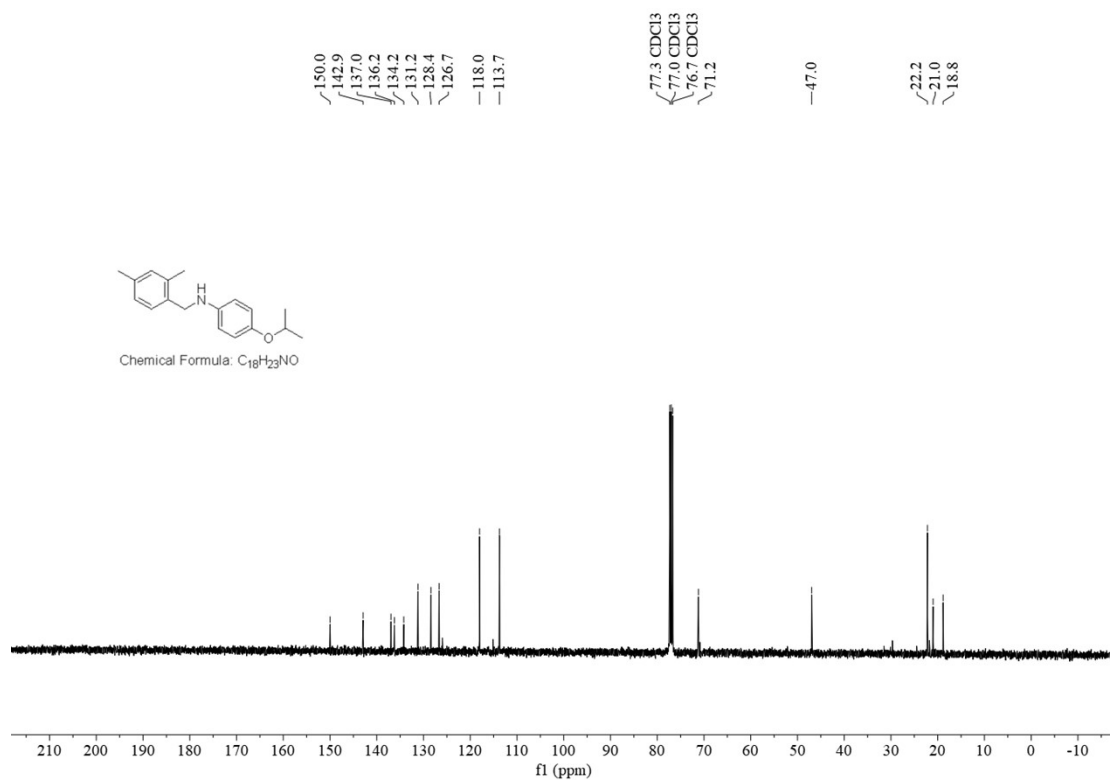

$^{13}C\{^1H\}$  NMR Spectrum of **3ma** in  $CDCl_3$  at 100 MHz

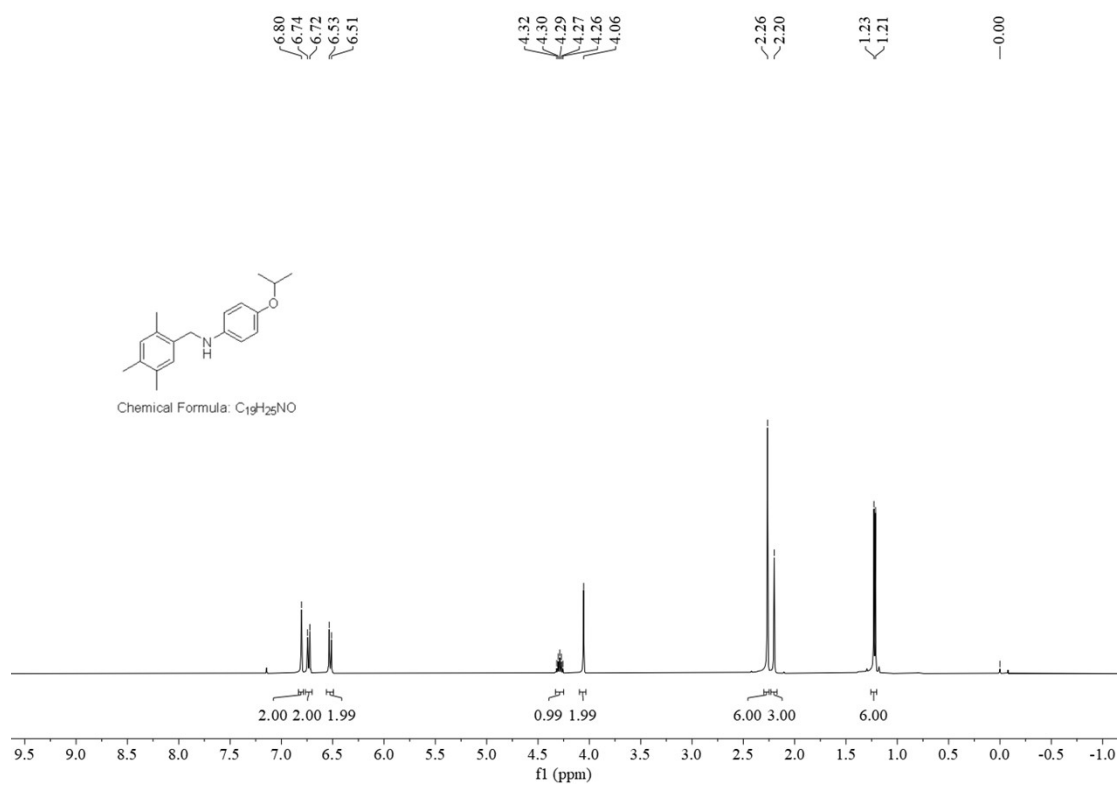

$^1H$  NMR Spectrum of **3na** in  $CDCl_3$  at 400 MHz



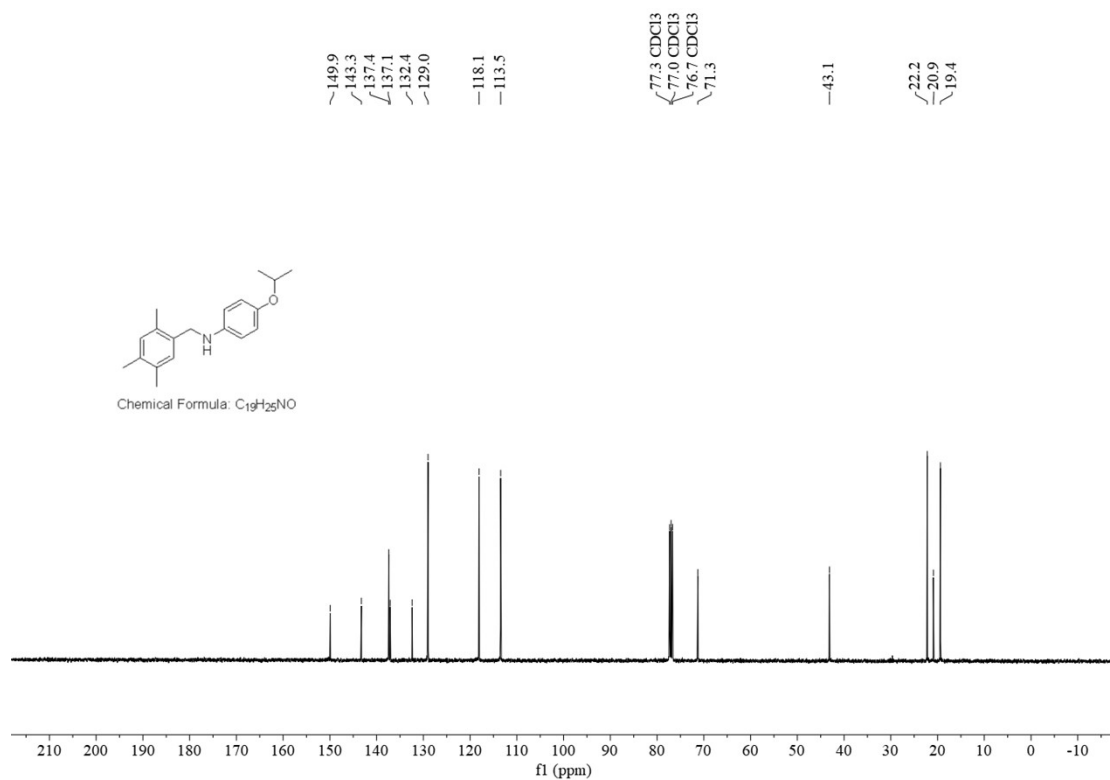

$^{13}C\{^1H\}$  NMR Spectrum of **3na** in  $CDCl_3$  at 100 MHz

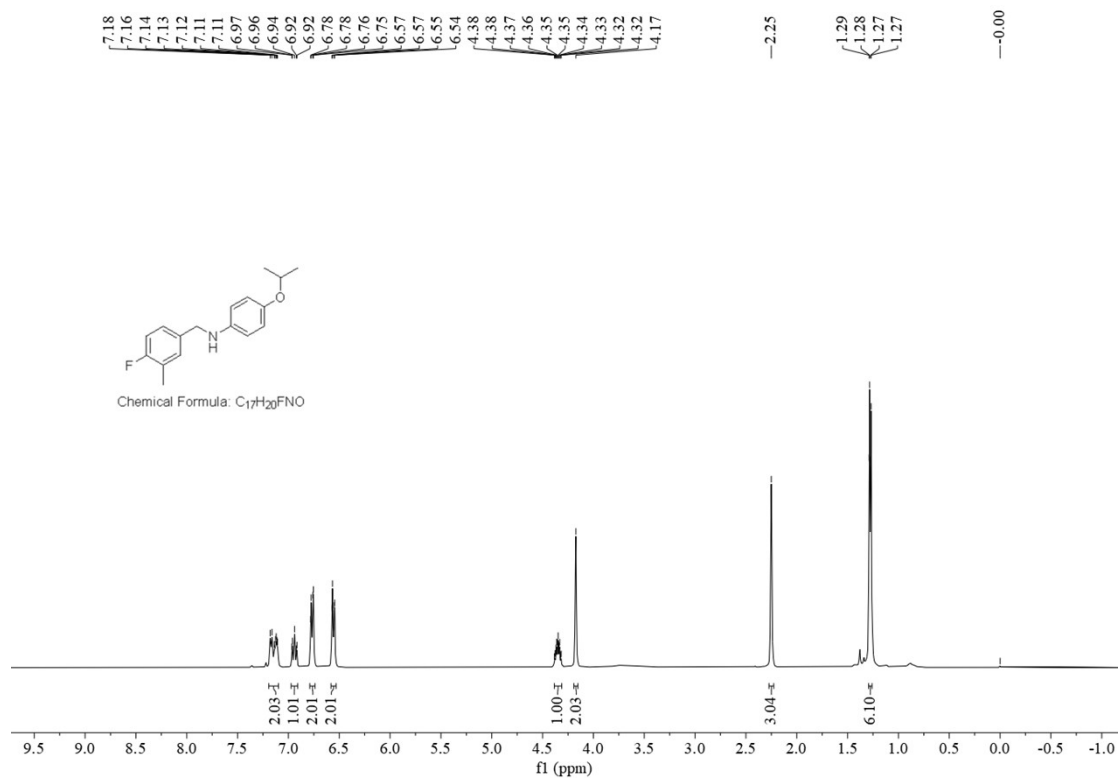

$^1H$  NMR Spectrum of **3oa** in  $CDCl_3$  at 400 MHz

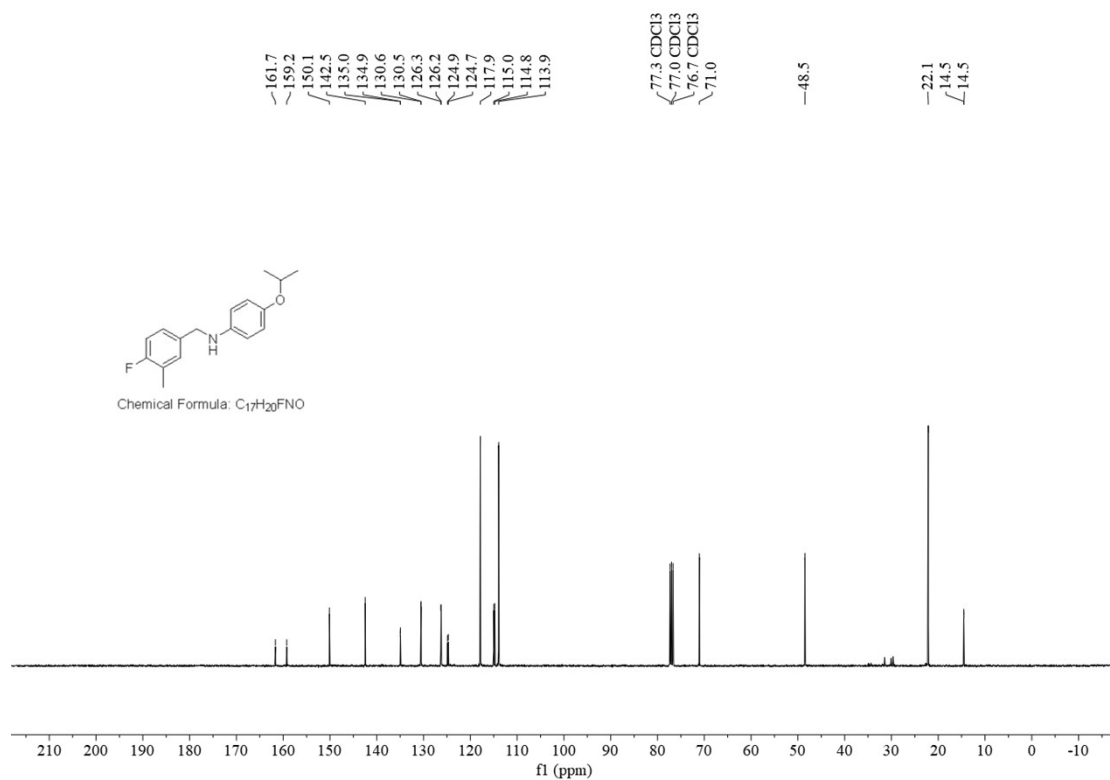

<sup>13</sup>C{<sup>1</sup>H} NMR Spectrum of **30a** in CDCl<sub>3</sub> at 100 MHz

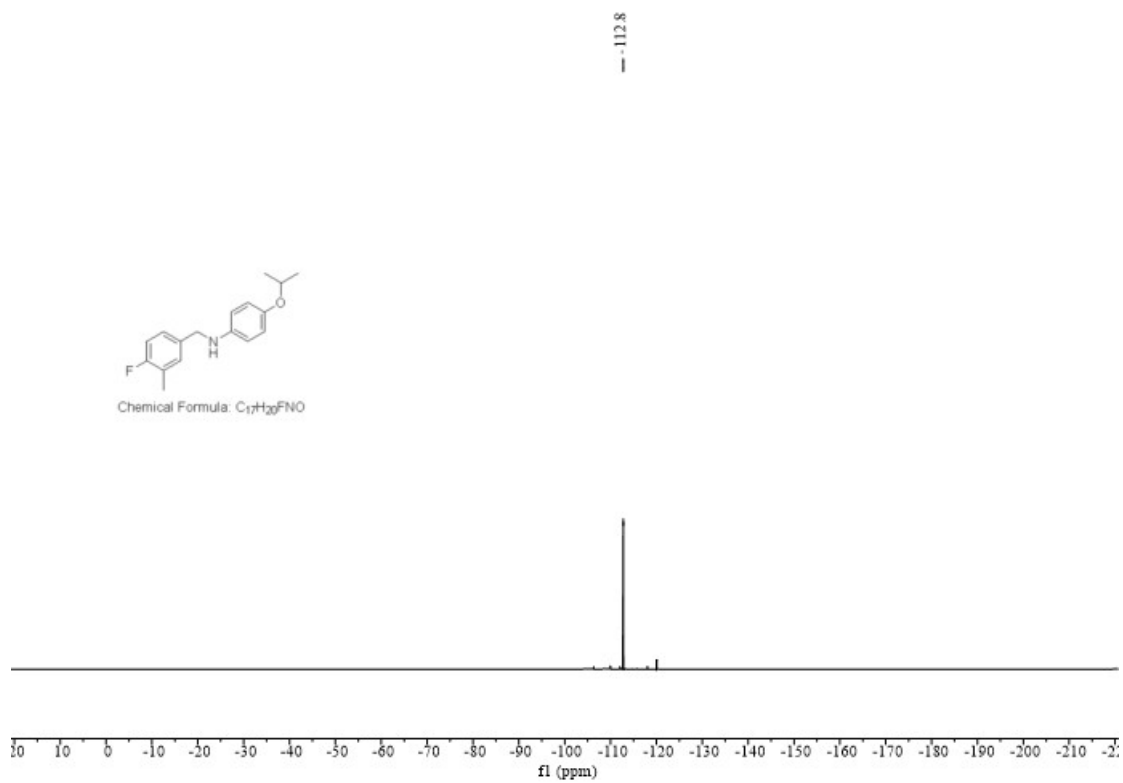

<sup>19</sup>F NMR Spectrum of **30a** in CDCl<sub>3</sub> at 377 MHz

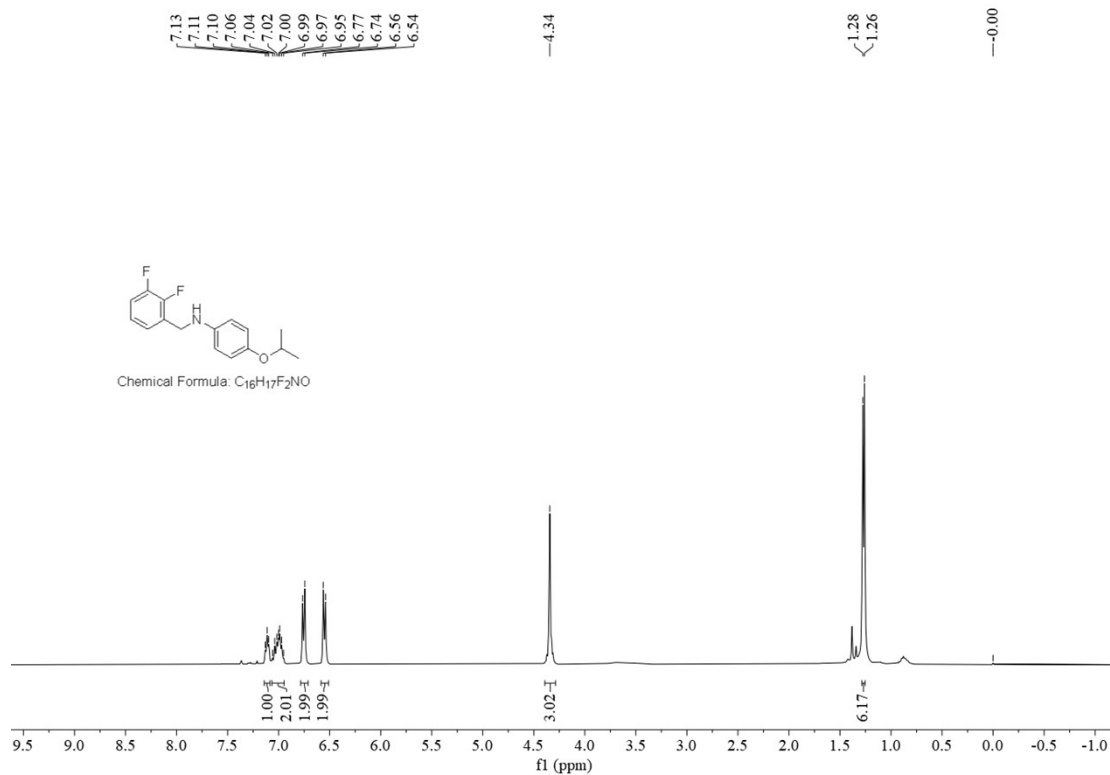

$^1\text{H}$  NMR Spectrum of **3pa** in  $\text{CDCl}_3$  at 400 MHz

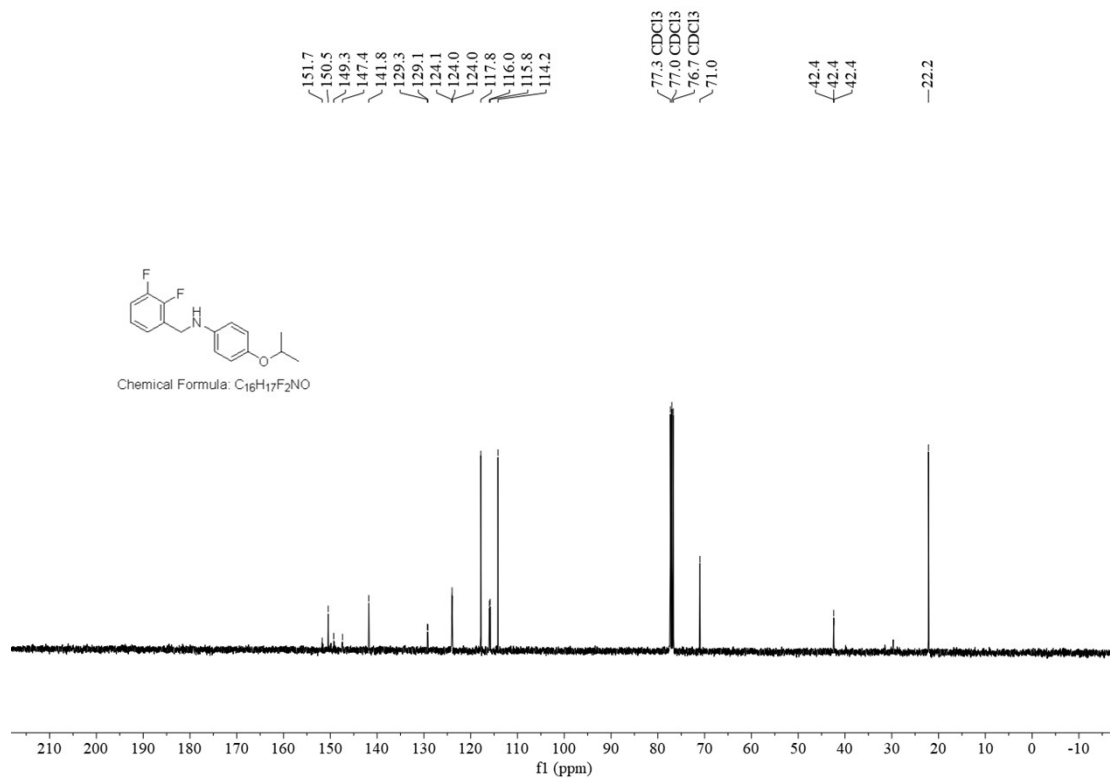

$^{13}\text{C}\{^1\text{H}\}$  NMR Spectrum of **3pa** in  $\text{CDCl}_3$  at 100 MHz

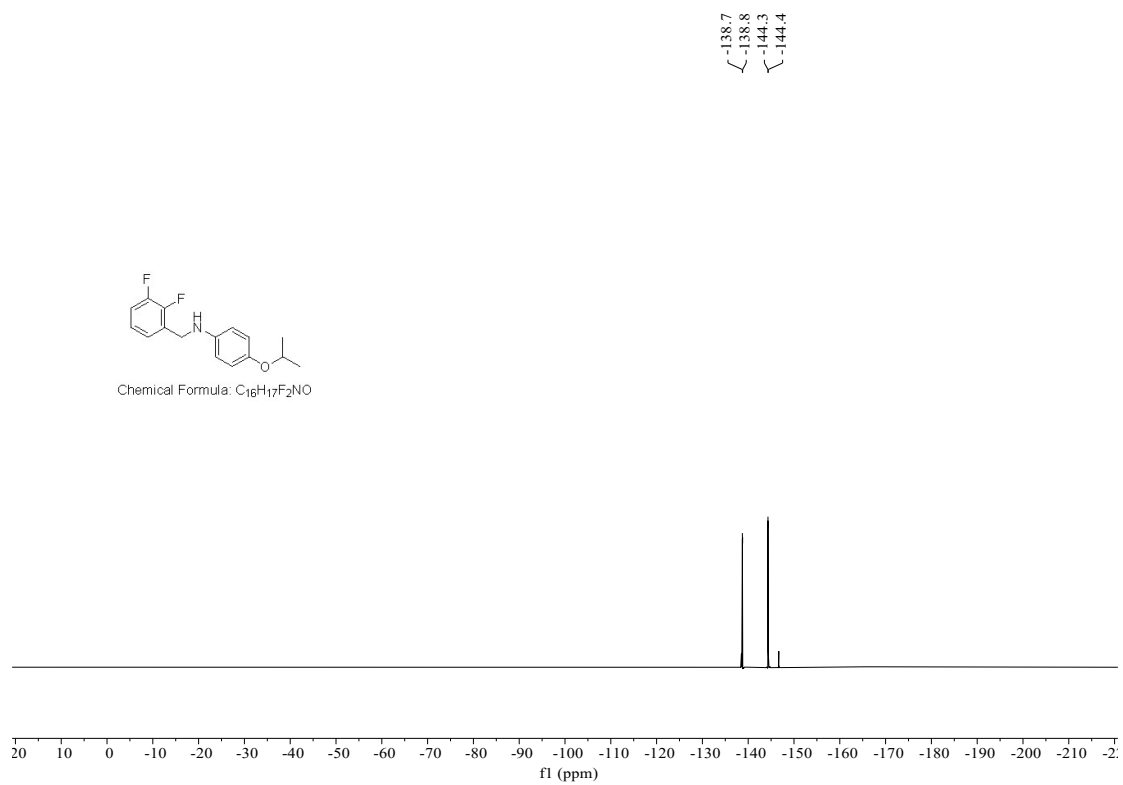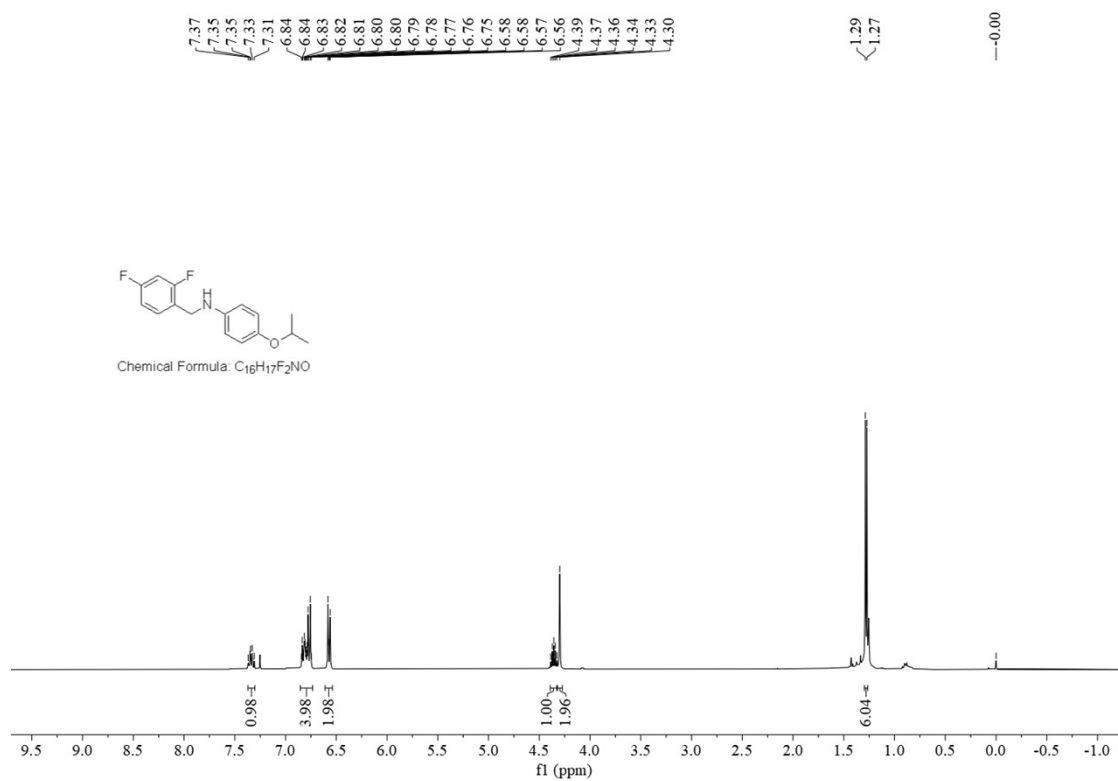

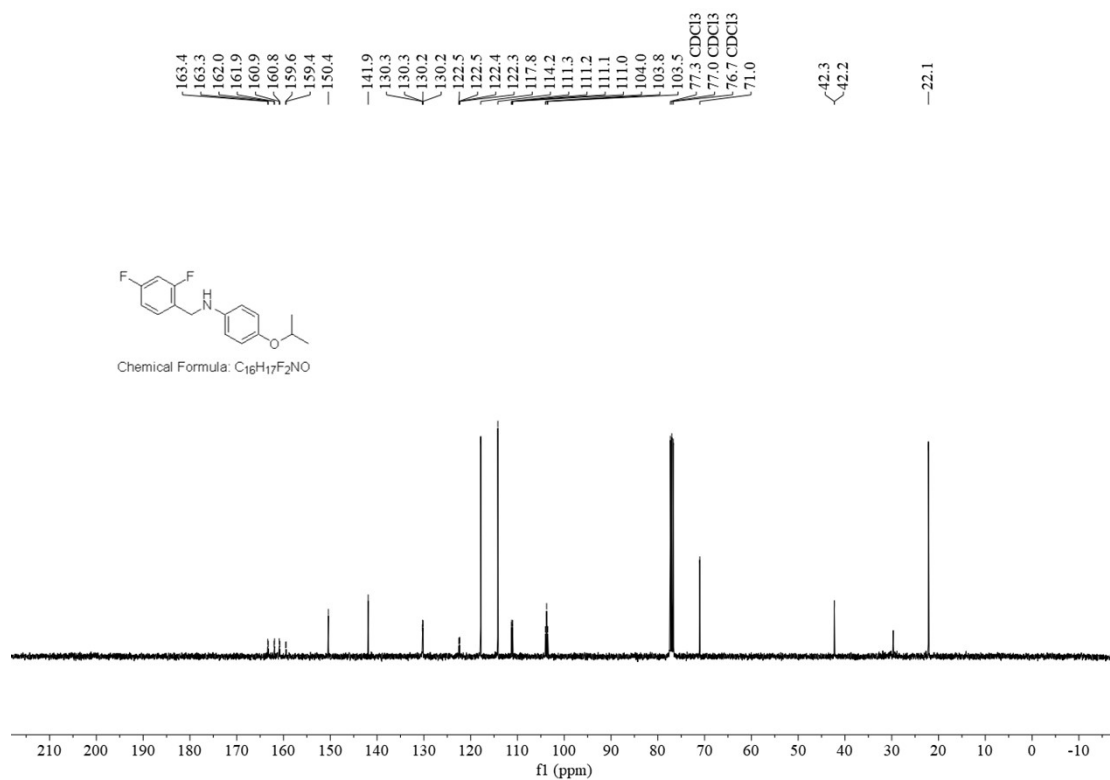

$^{13}\text{C}\{^1\text{H}\}$  NMR Spectrum of **3qa** in  $\text{CDCl}_3$  at 100 MHz

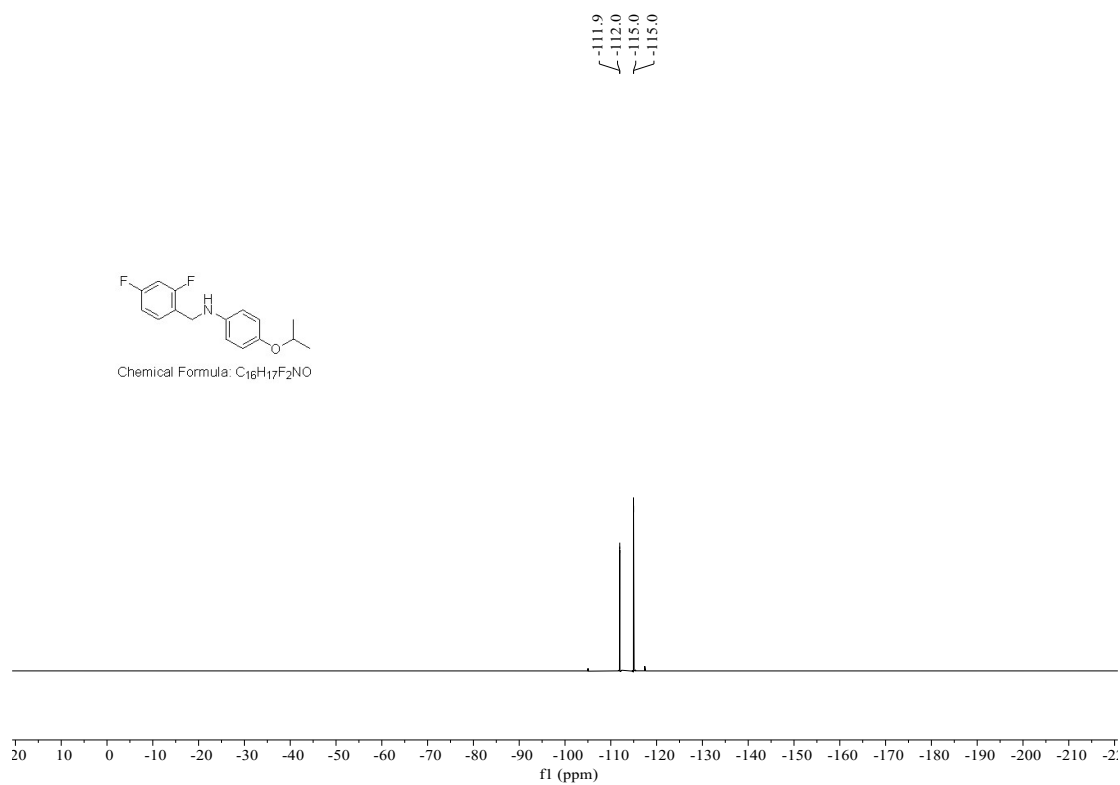

$^{19}\text{F}$  NMR Spectrum of **3qa** in  $\text{CDCl}_3$  at 377 MHz

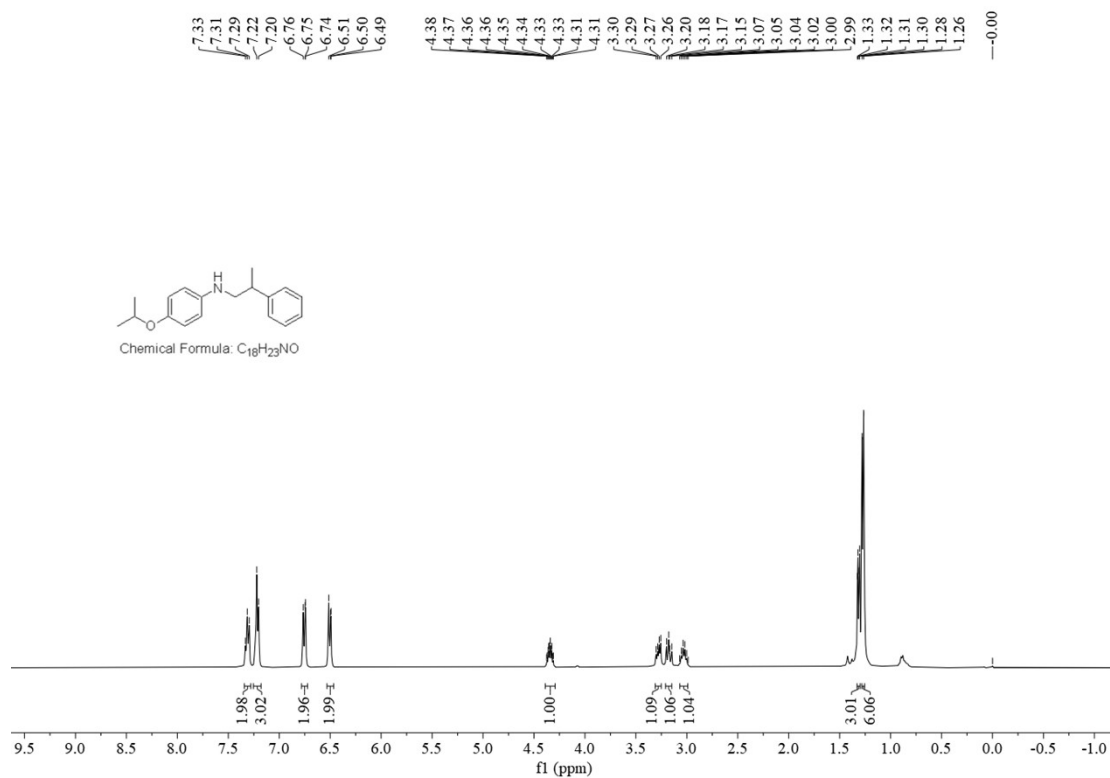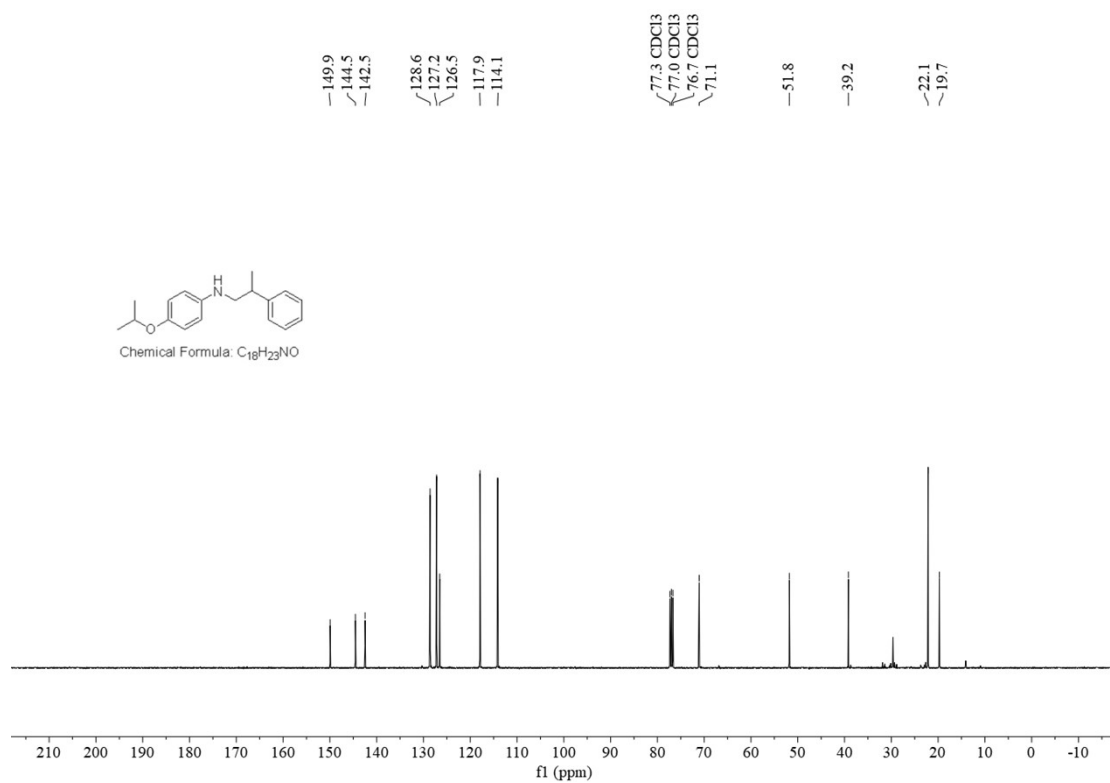

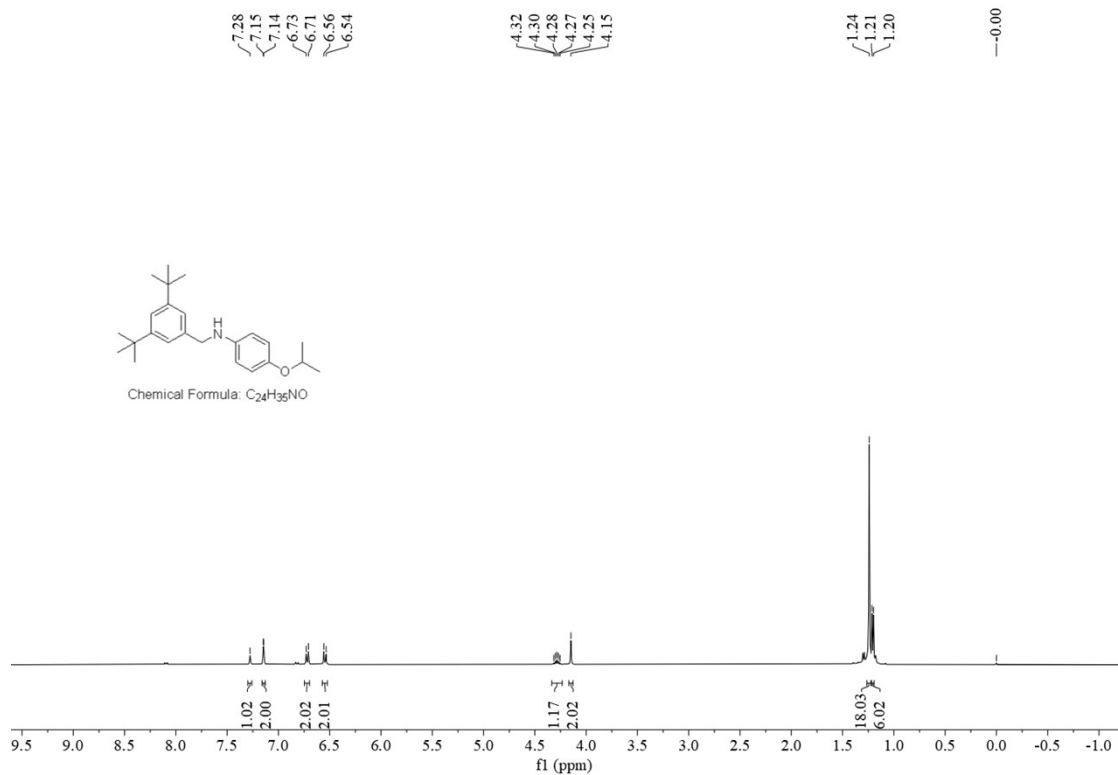

$^1H$  NMR Spectrum of **3sa** in  $CDCl_3$  at 400 MHz

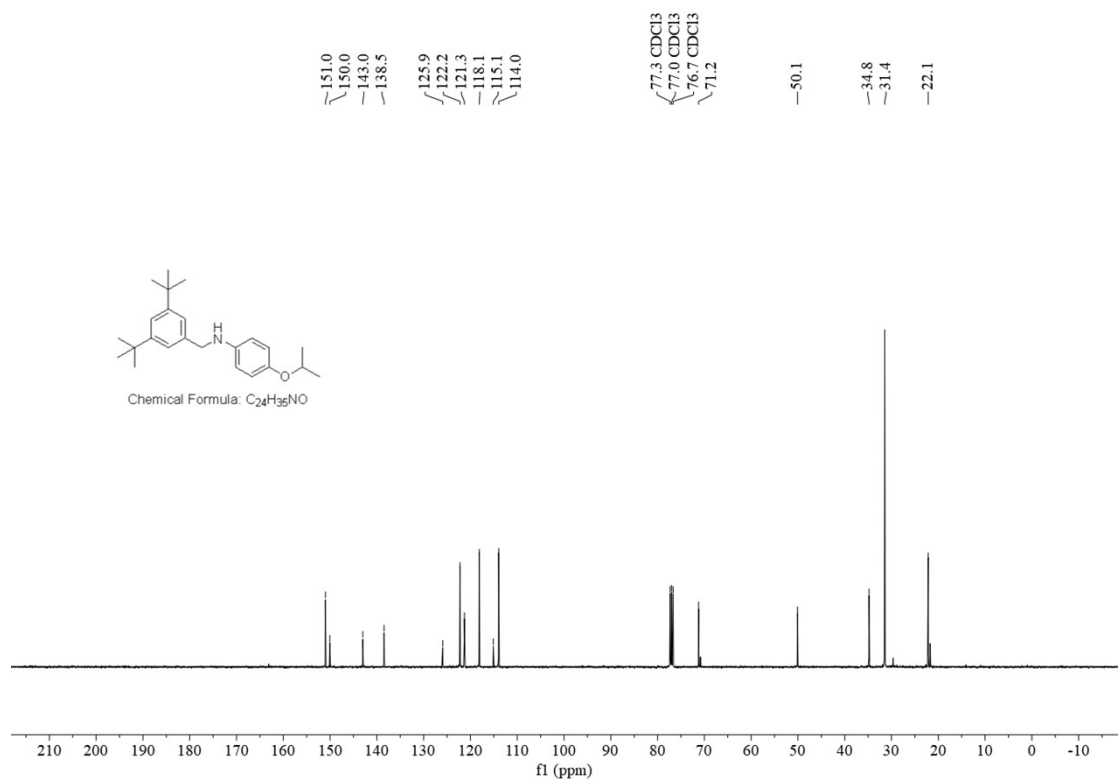

$^{13}C\{^1H\}$  NMR Spectrum of **3sa** in  $CDCl_3$  at 100 MHz

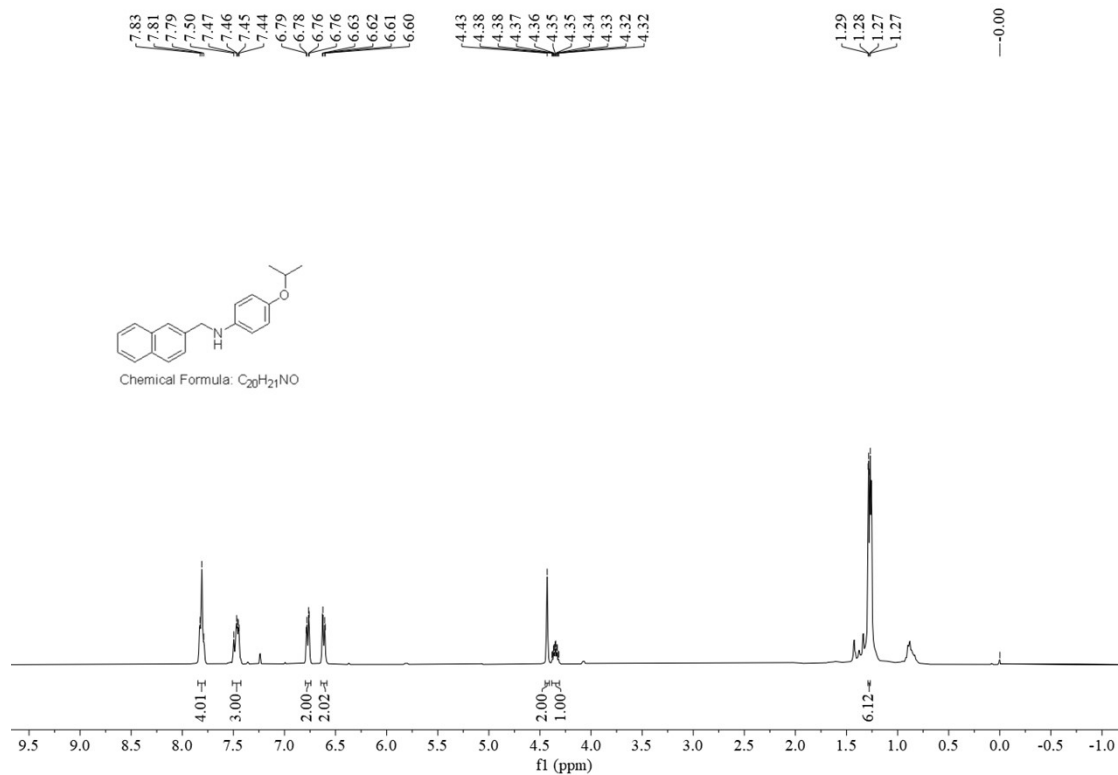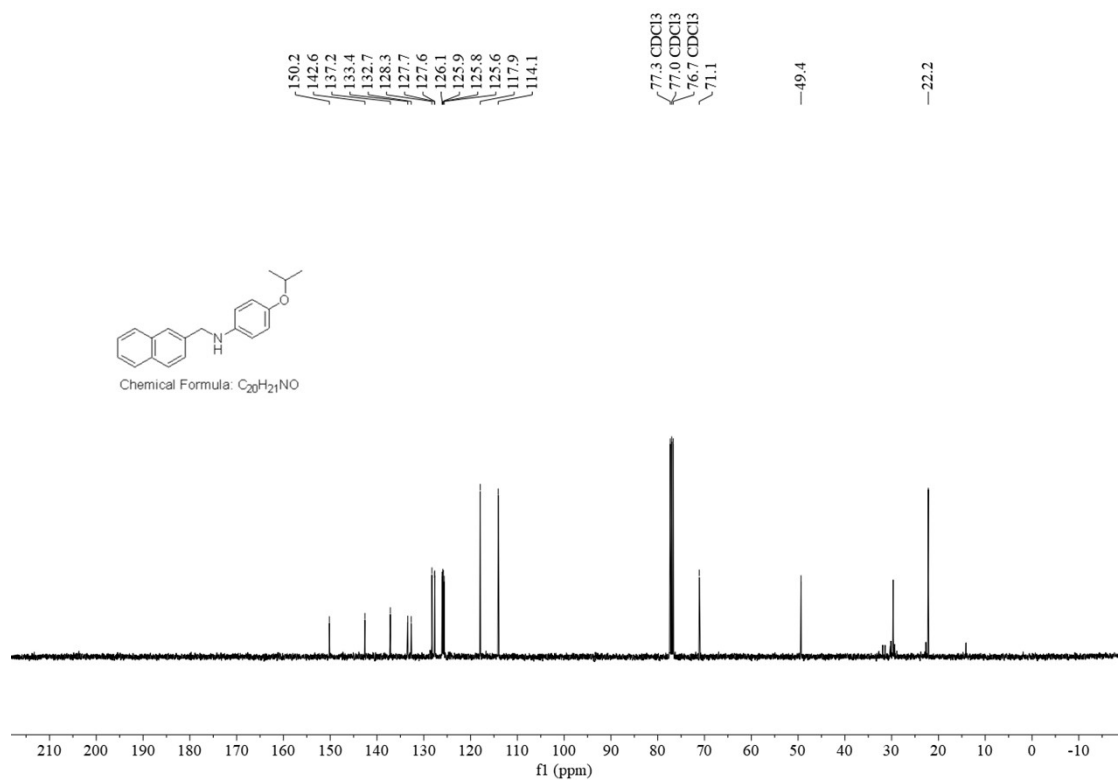



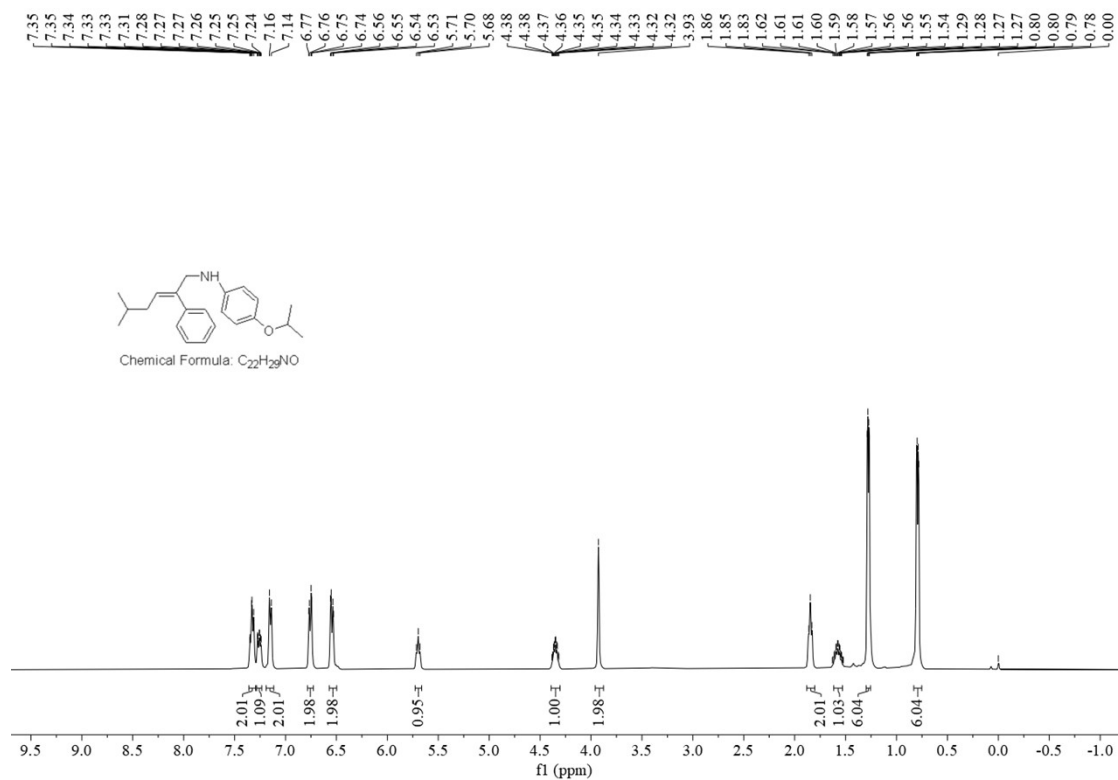

<sup>1</sup>H NMR Spectrum of **3ua** in CDCl<sub>3</sub> at 400 MHz

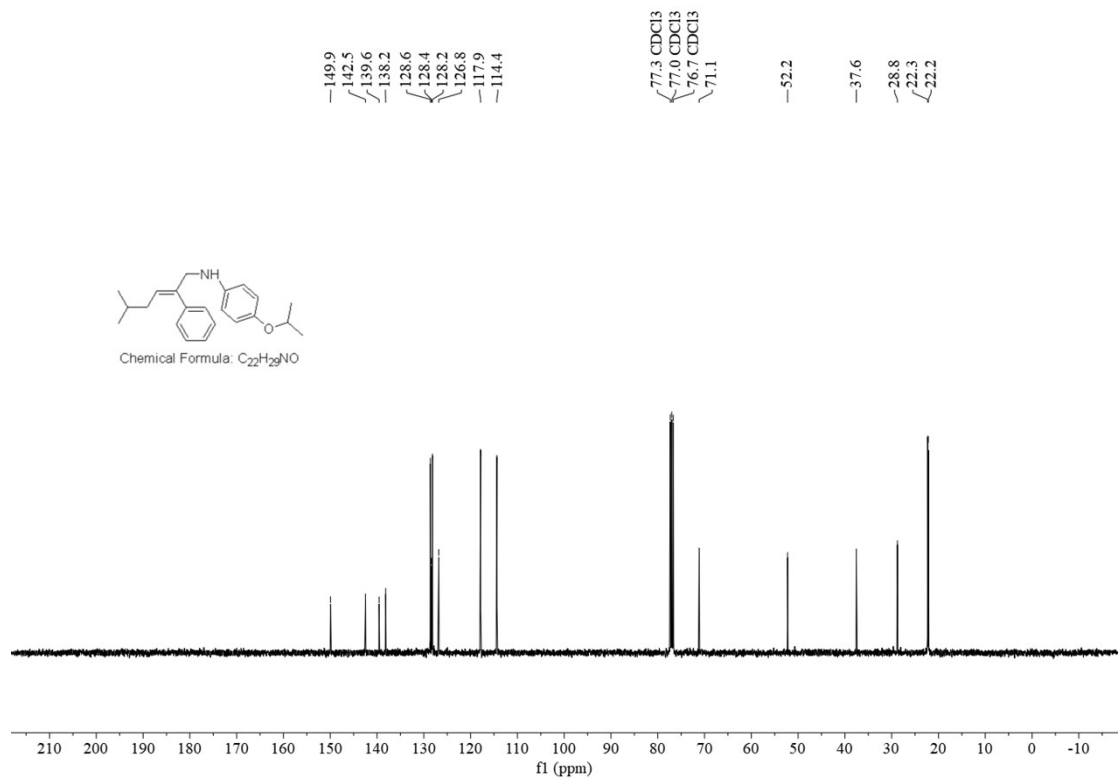

<sup>13</sup>C{<sup>1</sup>H} NMR Spectrum of **3ua** in CDCl<sub>3</sub> at 100 MHz

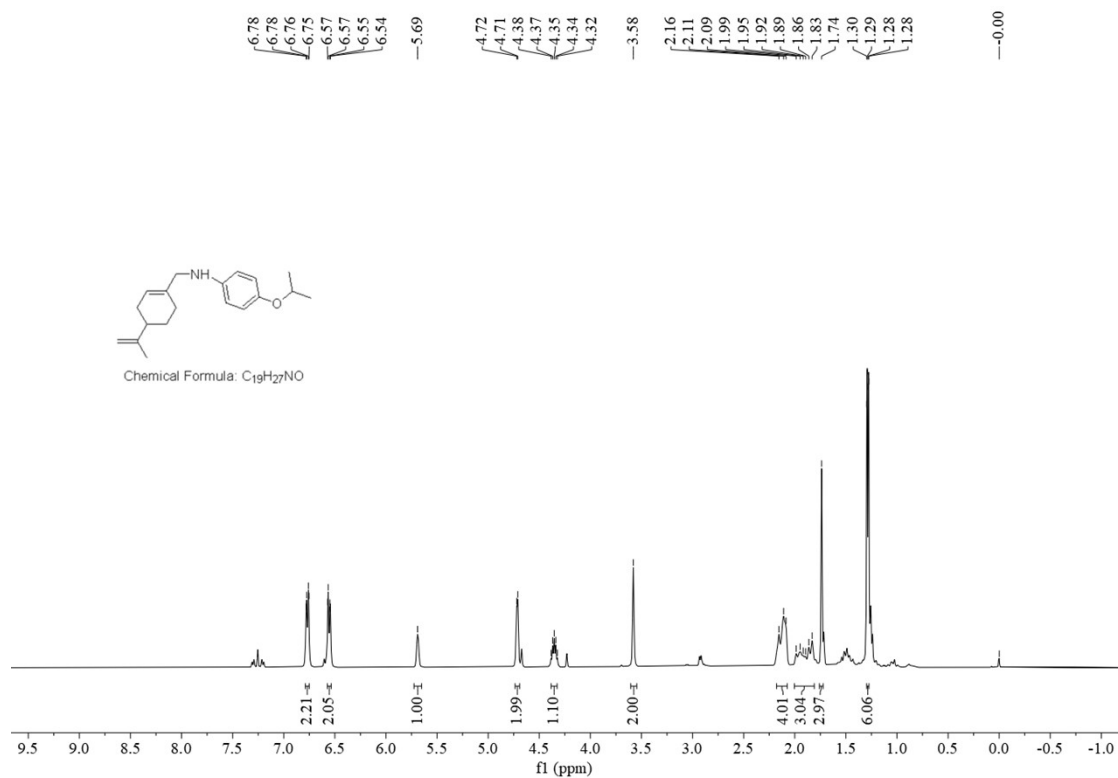

<sup>1</sup>H NMR Spectrum of **3va** in CDCl<sub>3</sub> at 400 MHz

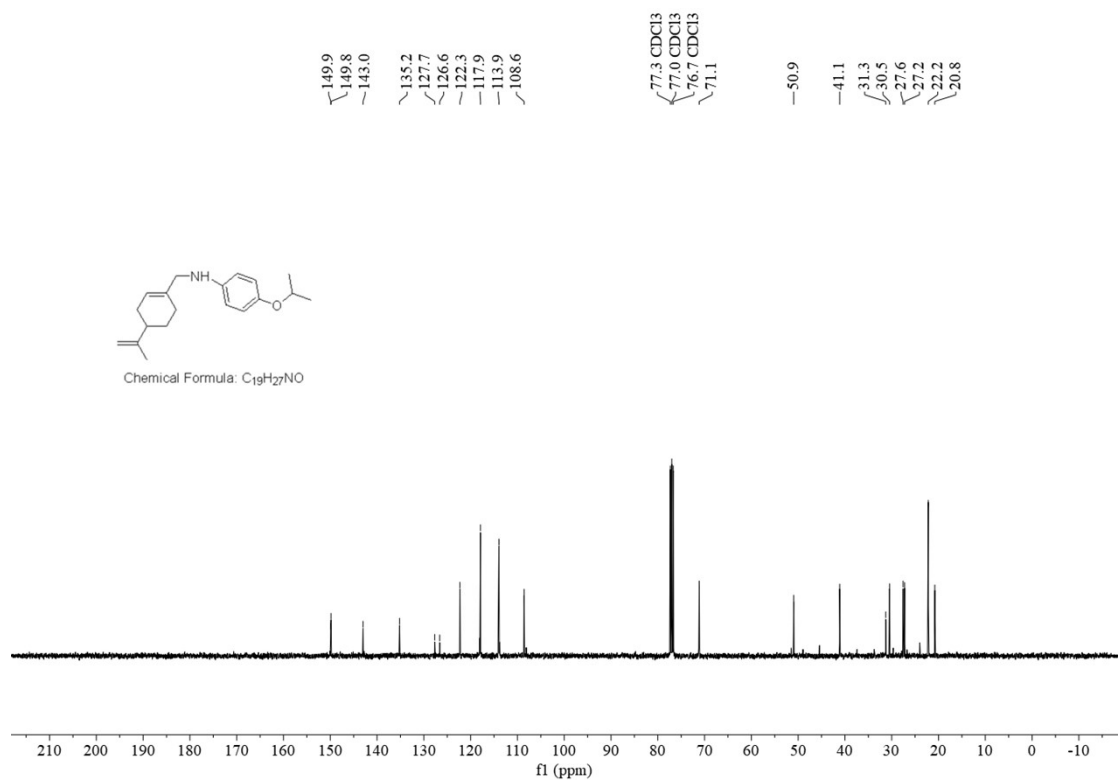

<sup>13</sup>C {<sup>1</sup>H} NMR Spectrum of **3va** in CDCl<sub>3</sub> at 100 MHz

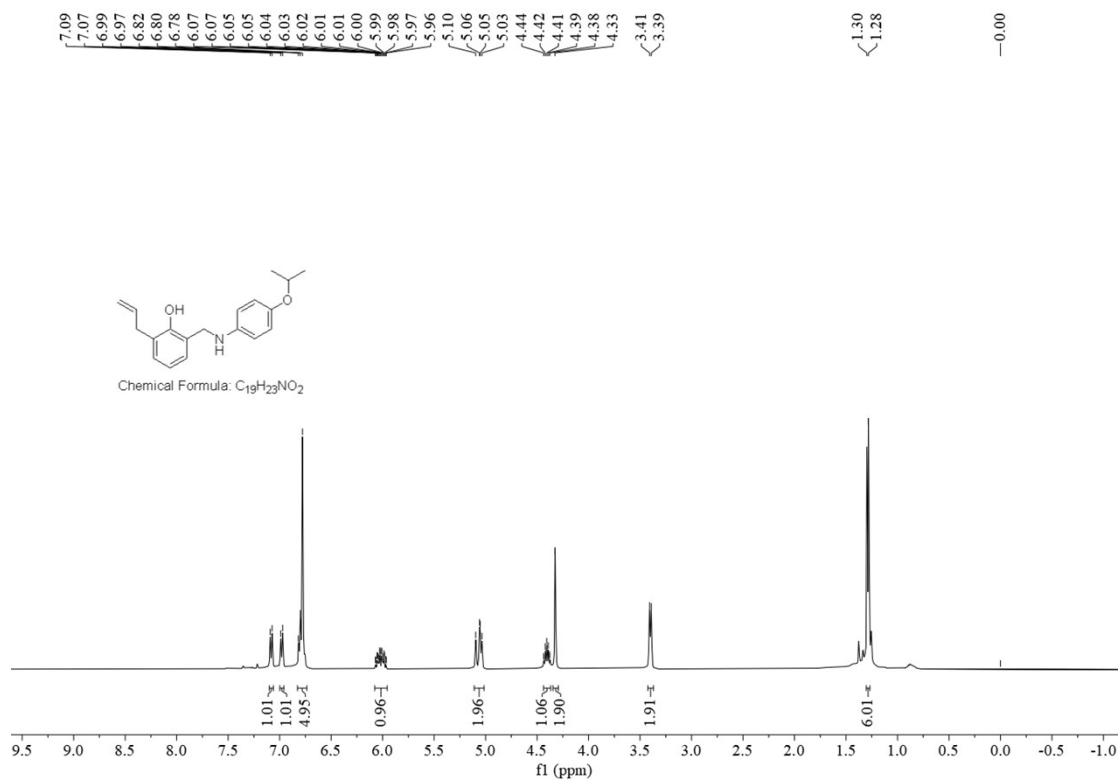

$^1H$  NMR Spectrum of **3wa** in  $CDCl_3$  at 400 MHz

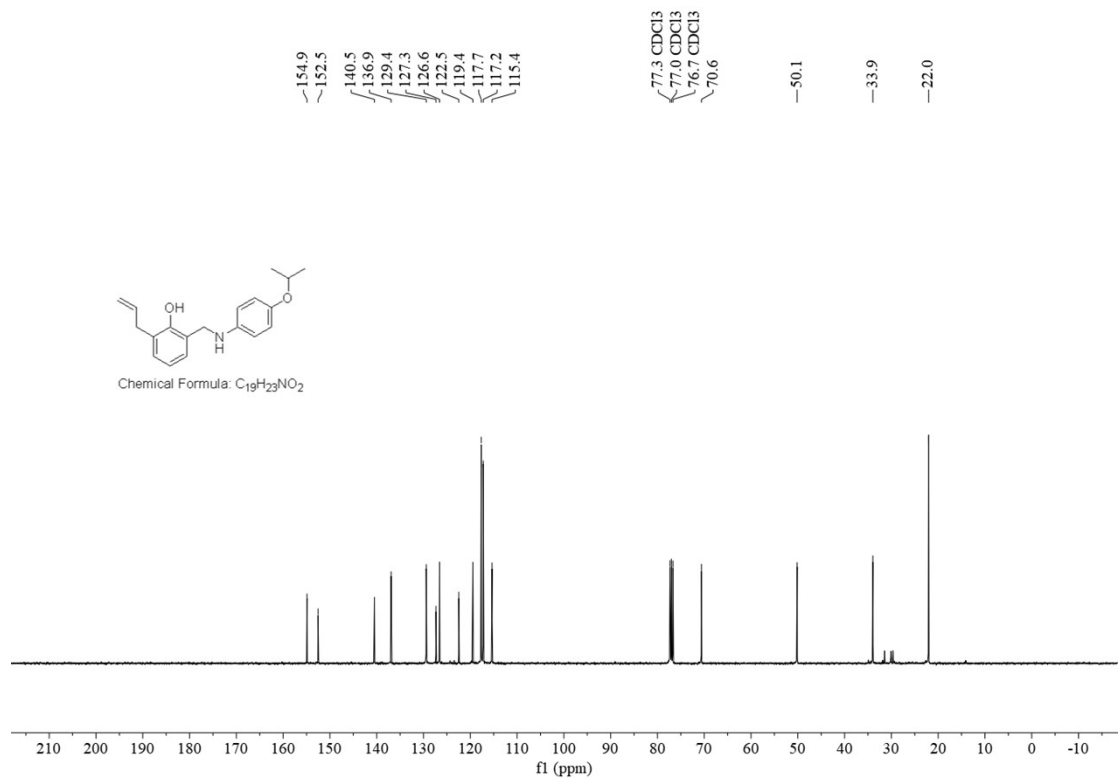

$^{13}C\{^1H\}$  NMR Spectrum of **3wa** in  $CDCl_3$  at 100 MHz

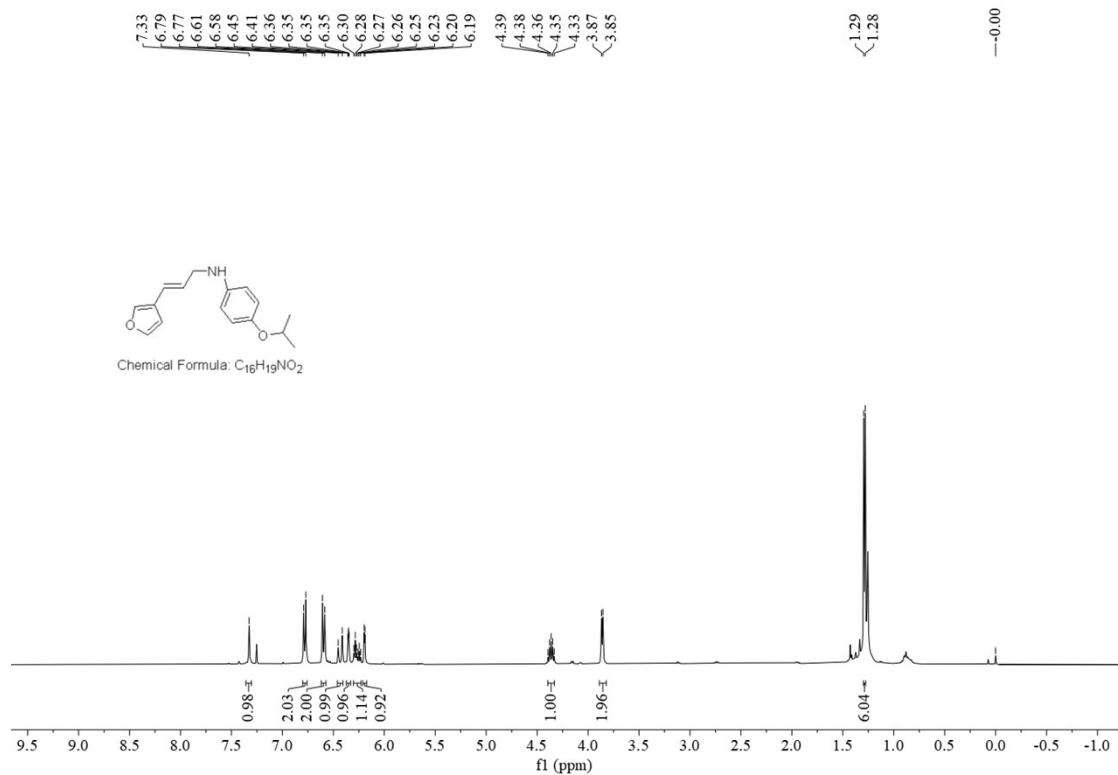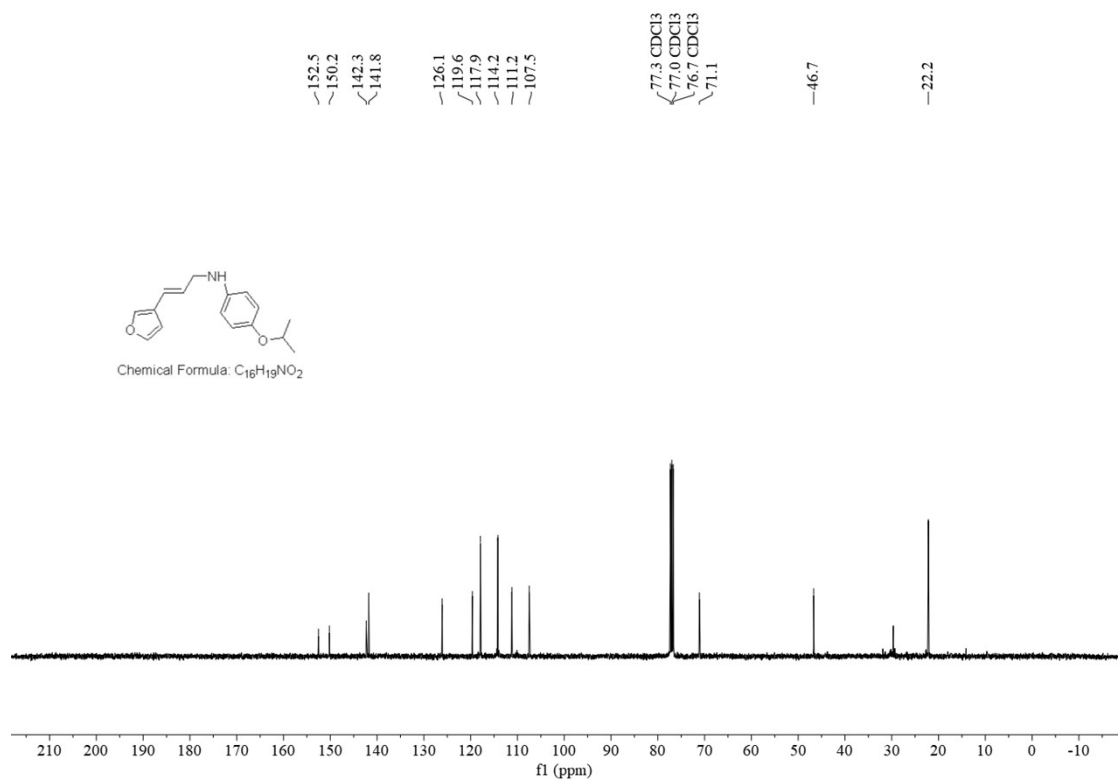

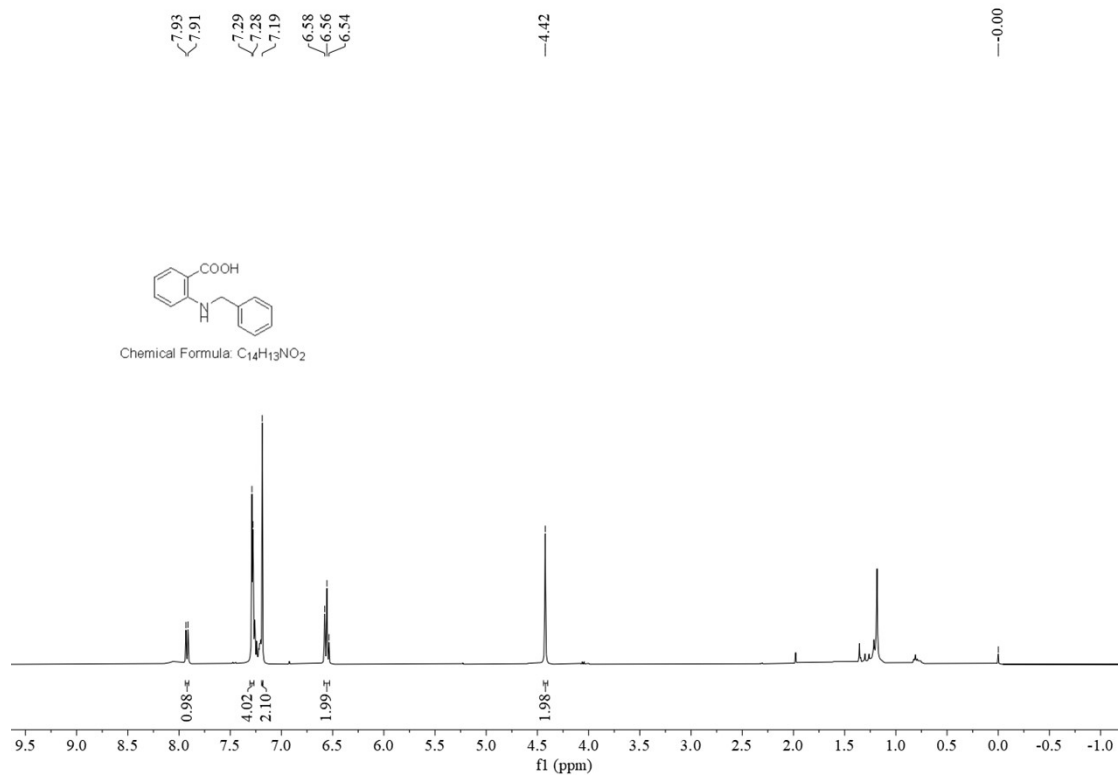

<sup>1</sup>H NMR Spectrum of **3ab** in CDCl<sub>3</sub> at 400 MHz

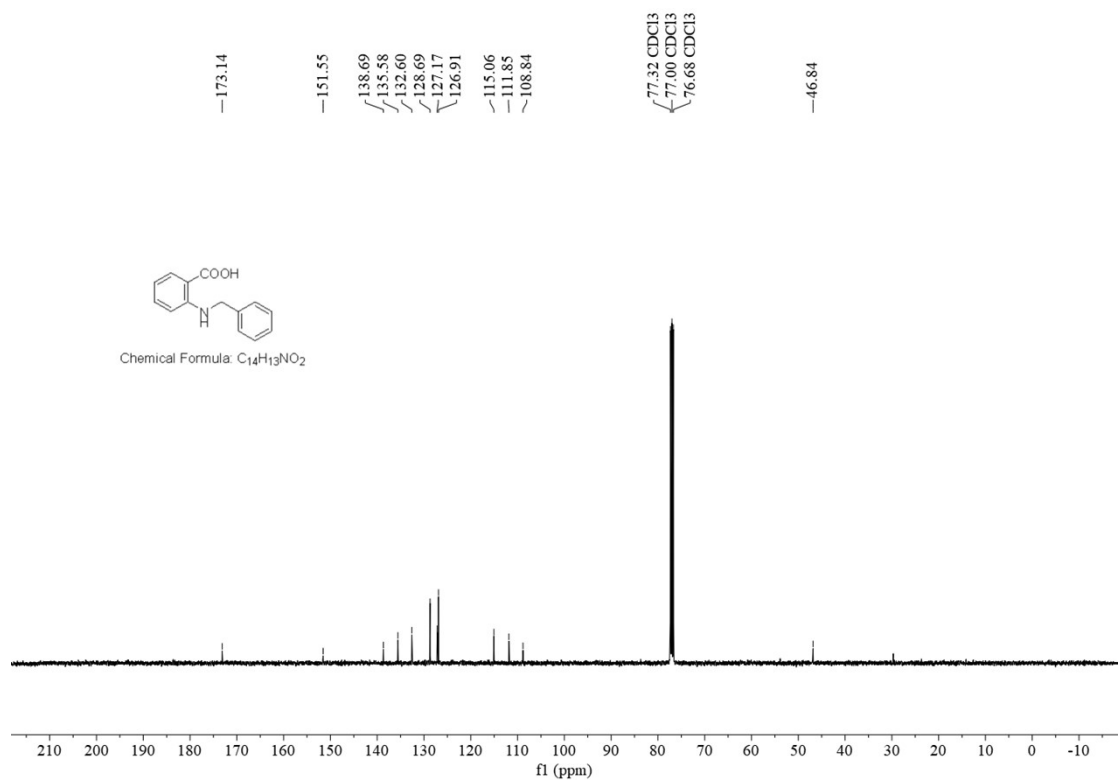

<sup>13</sup>C{<sup>1</sup>H} NMR Spectrum of **3ab** in CDCl<sub>3</sub> at 100 MHz

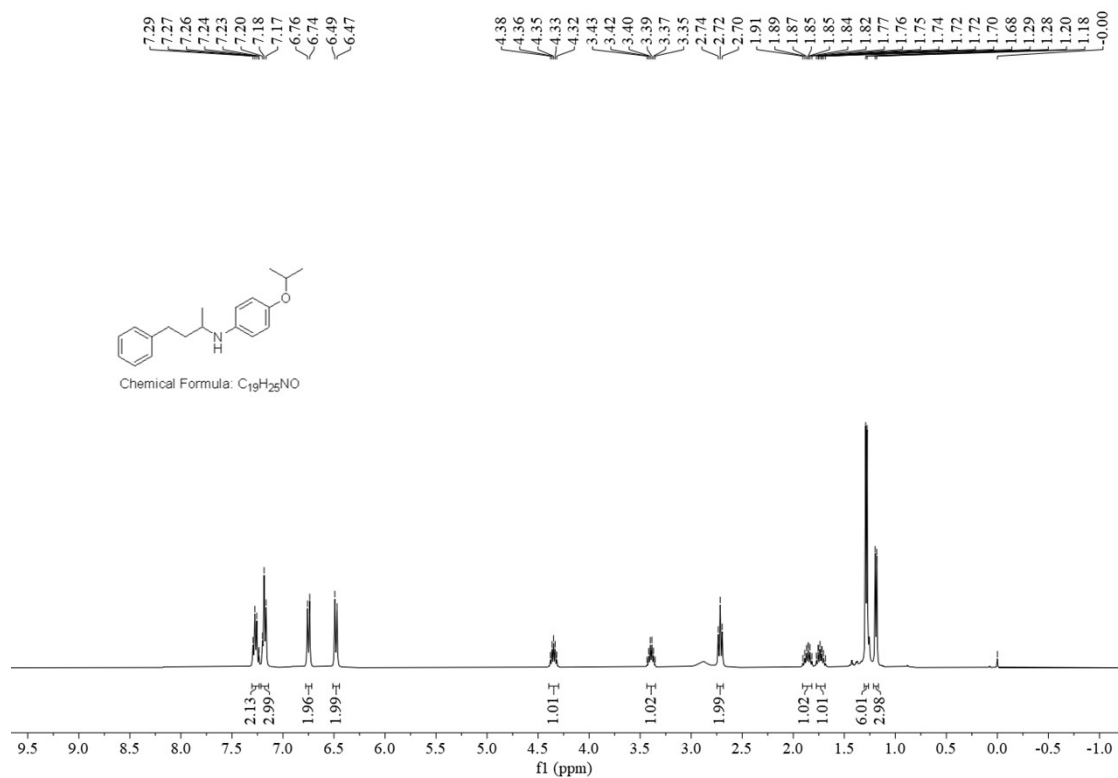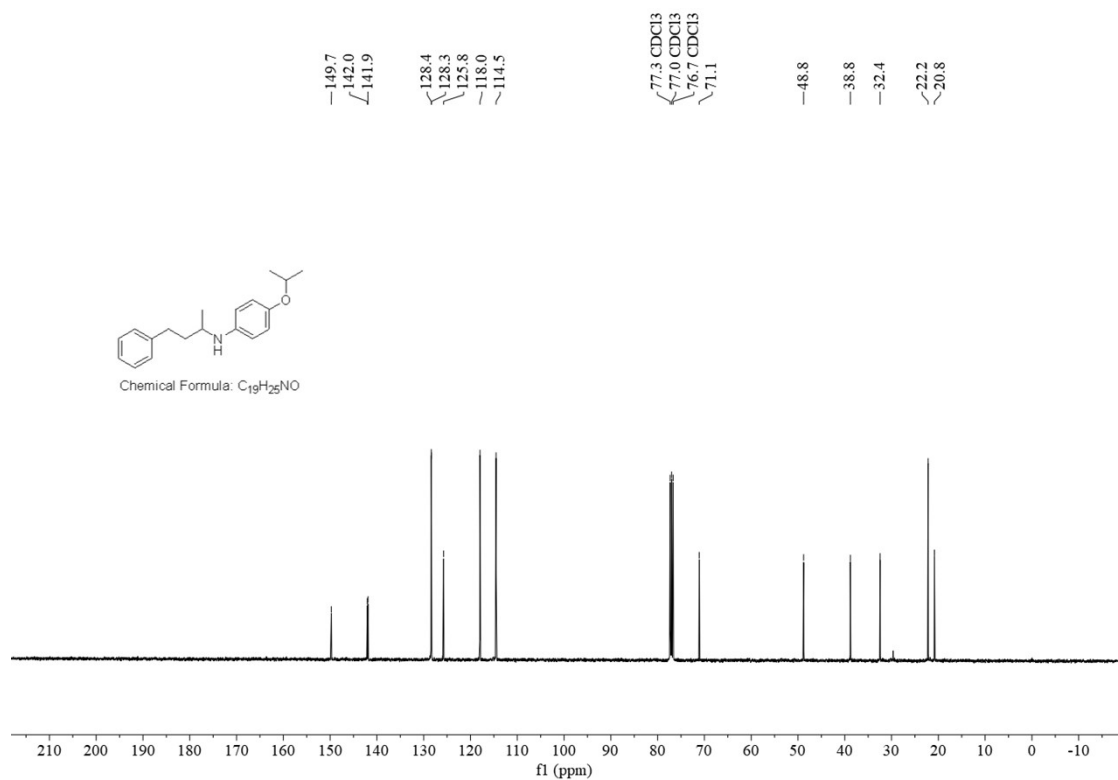

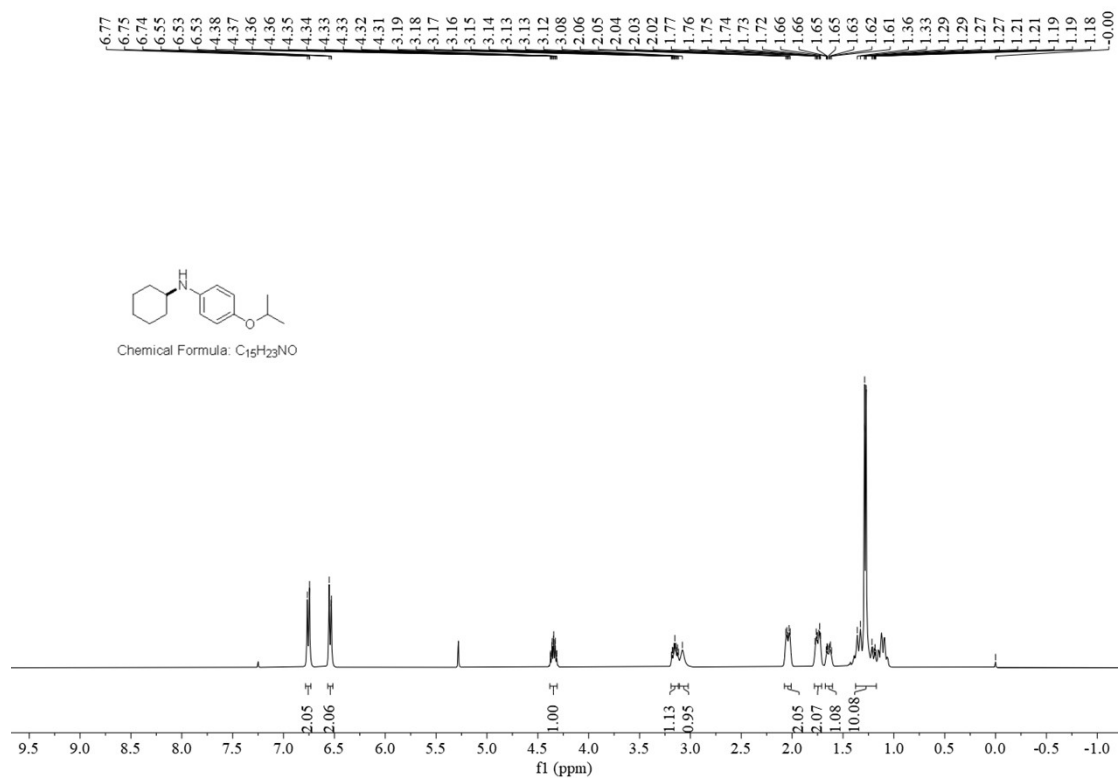

<sup>1</sup>H NMR Spectrum of **4ba** in CDCl<sub>3</sub> at 400 MHz

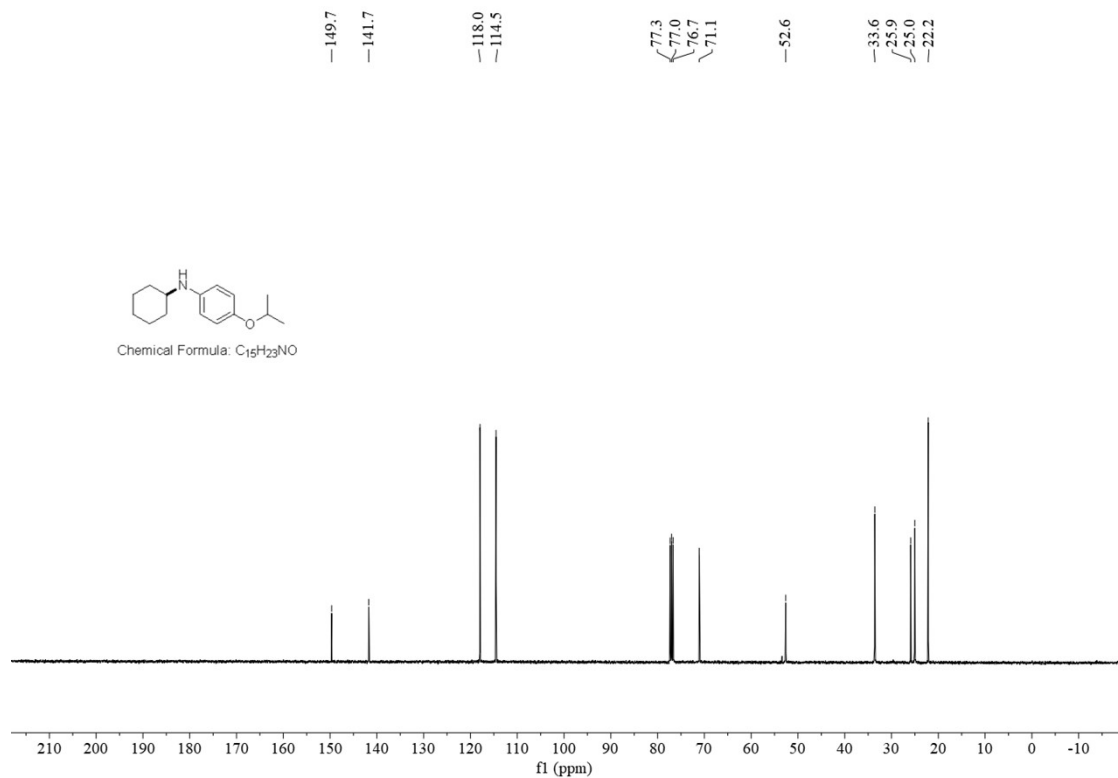

<sup>13</sup>C {<sup>1</sup>H} NMR Spectrum of **4ba** in CDCl<sub>3</sub> at 100 MHz

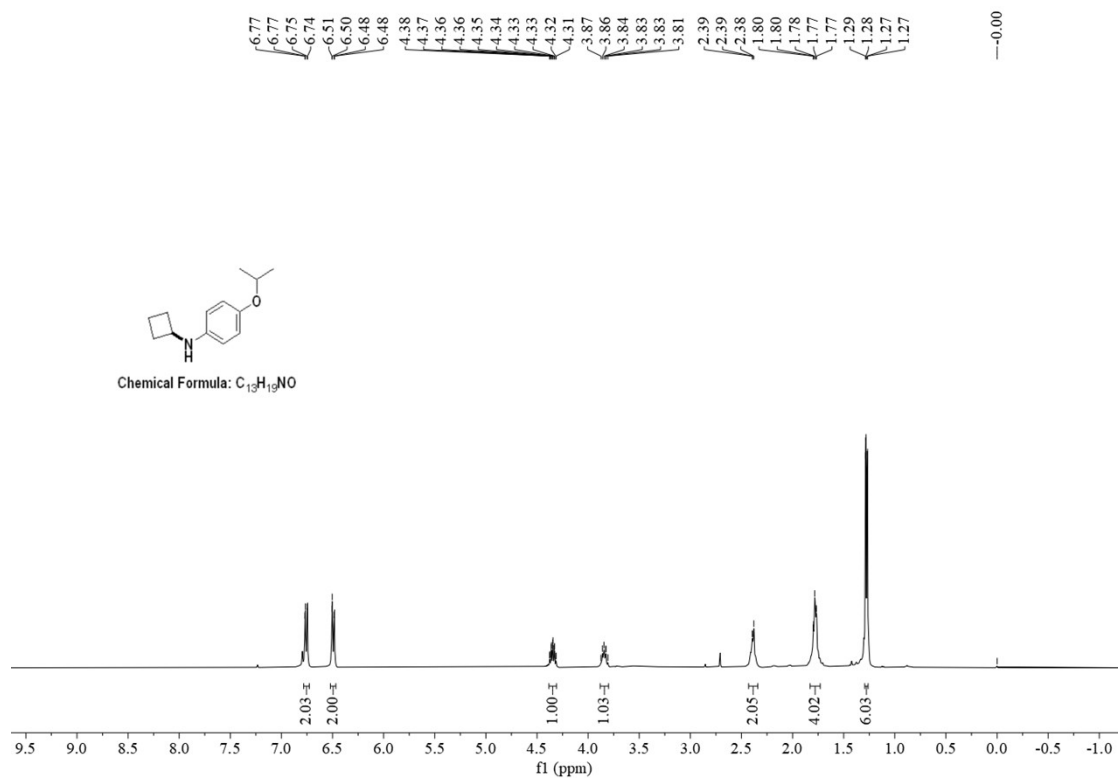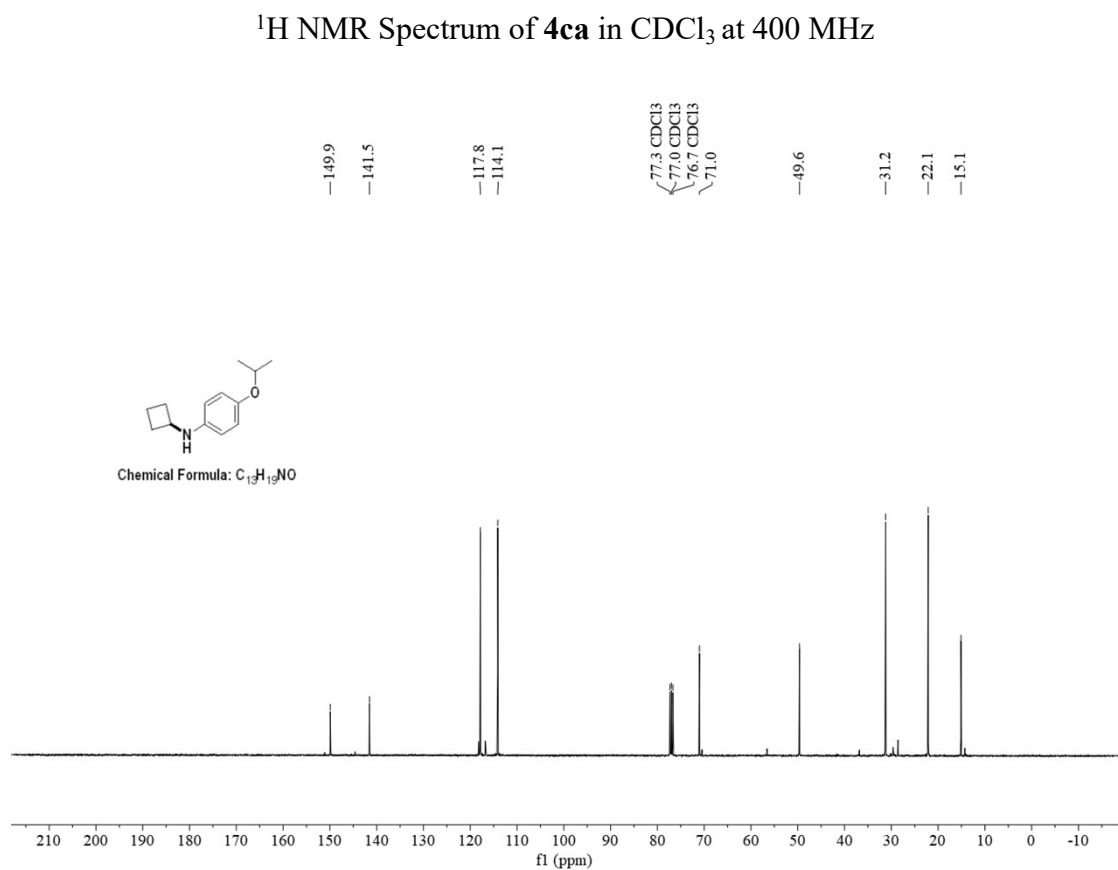



6.56  
6.54  
6.35  
6.33  
4.17  
4.17  
4.16  
4.16  
4.14  
4.14  
4.13  
4.12  
4.11  
4.11  
2.67  
2.65  
2.64  
2.62  
2.61  
1.08  
1.06  
1.00  
0.98  
0.72  
0.72  
0.71  
0.70  
0.69  
0.68  
0.68  
0.67  
0.66  
0.66  
0.65  
0.27  
0.25  
0.09  
0.09  
0.08  
0.07  
0.06  
0.06  
0.04  
0.04  
0.03  
0.03  
0.02  
0.01  
-0.00

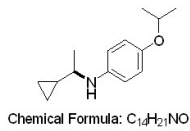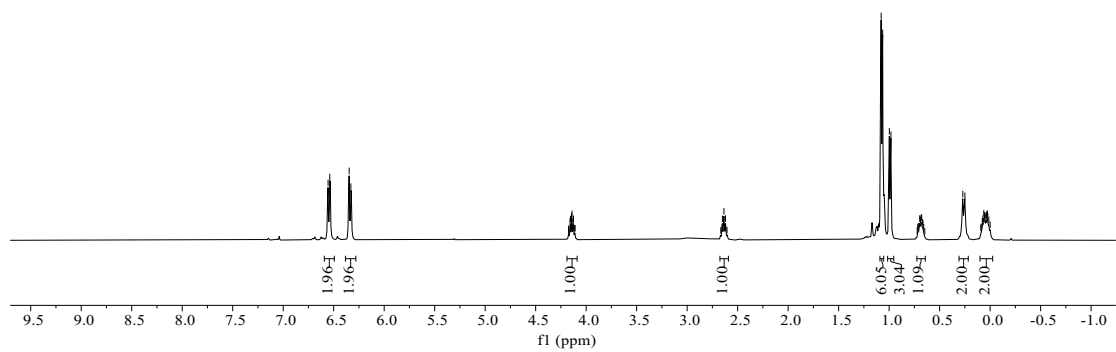

<sup>1</sup>H NMR Spectrum of **4da** in CDCl<sub>3</sub> at 400 MHz

149.8  
142.2  
117.8  
114.8  
77.3 CDCl<sub>3</sub>  
77.0 CDCl<sub>3</sub>  
76.7 CDCl<sub>3</sub>  
71.0  
53.6  
22.1  
20.2  
17.9  
3.1  
2.5

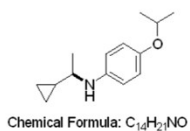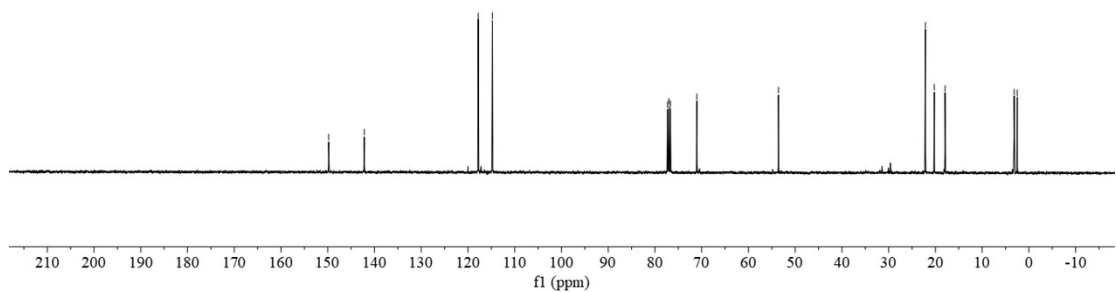

<sup>13</sup>C {<sup>1</sup>H} NMR Spectrum of **4da** in CDCl<sub>3</sub> at 100 MHz

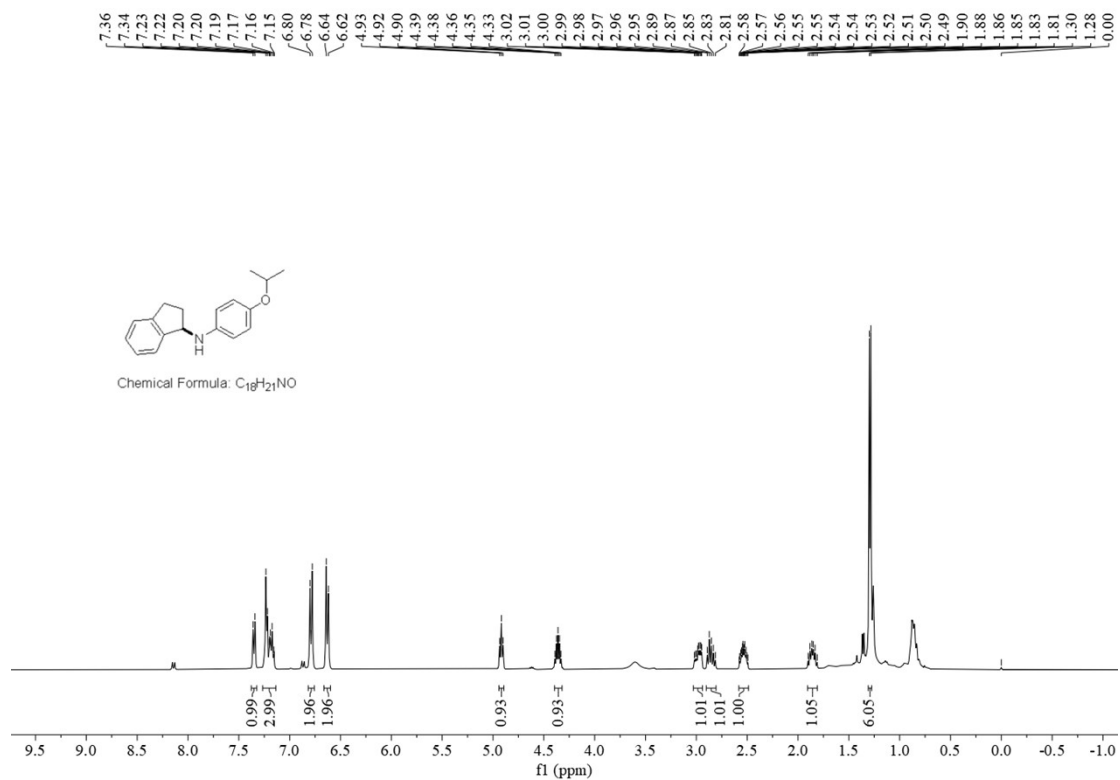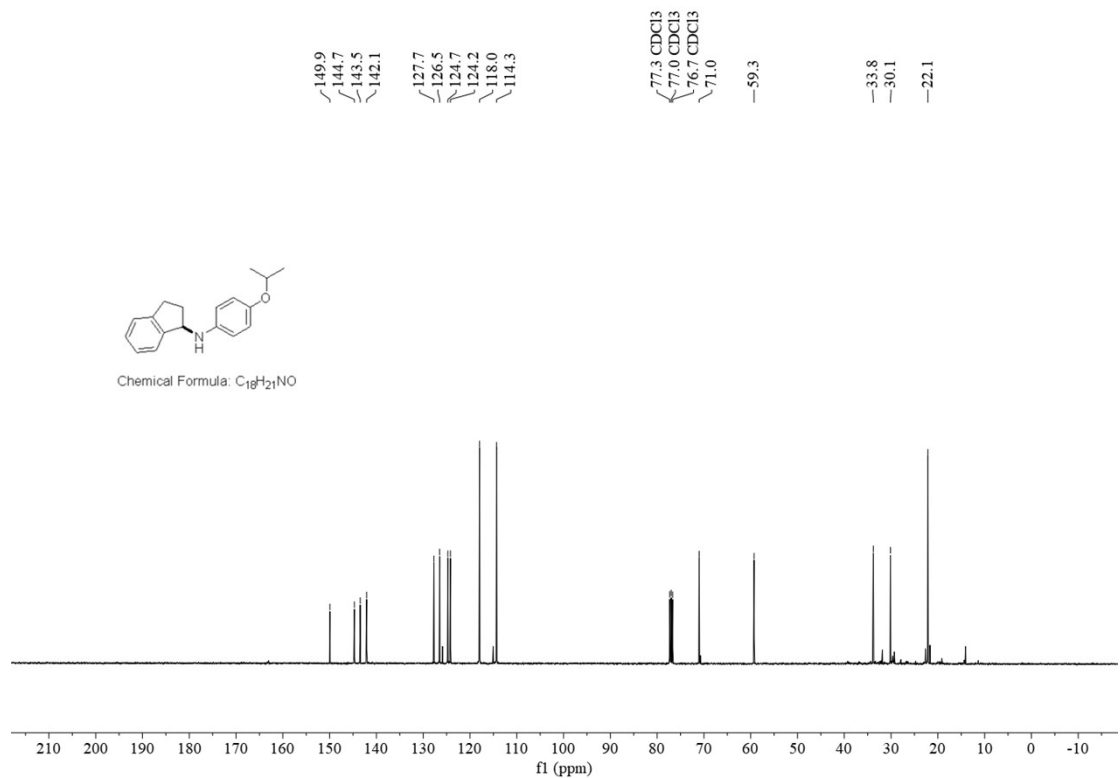

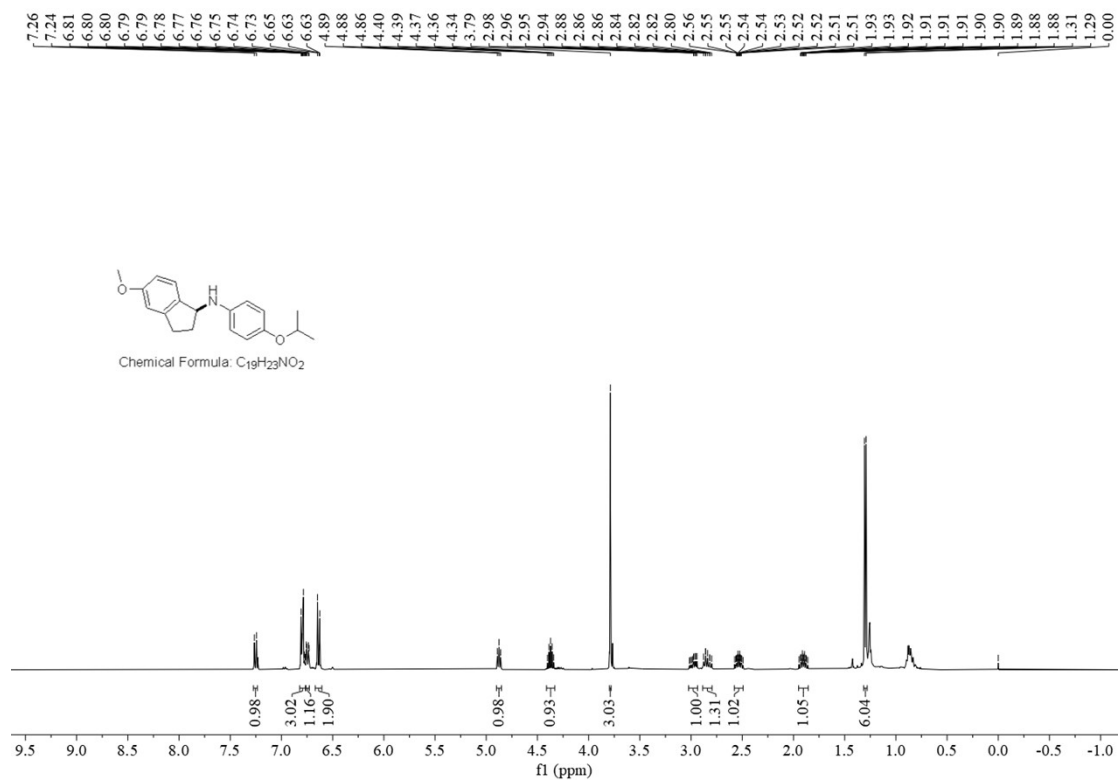

<sup>1</sup>H NMR Spectrum of **4fa** in CDCl<sub>3</sub> at 400 MHz

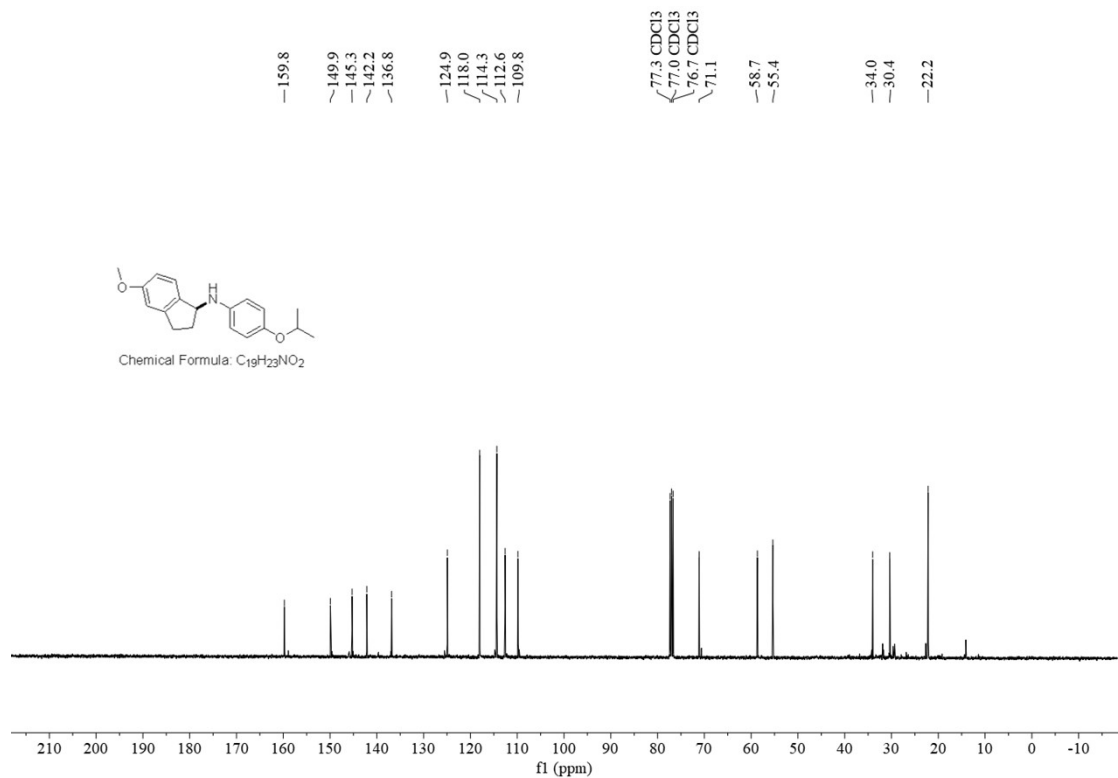

<sup>13</sup>C{<sup>1</sup>H} NMR Spectrum of **4fa** in CDCl<sub>3</sub> at 100 MHz

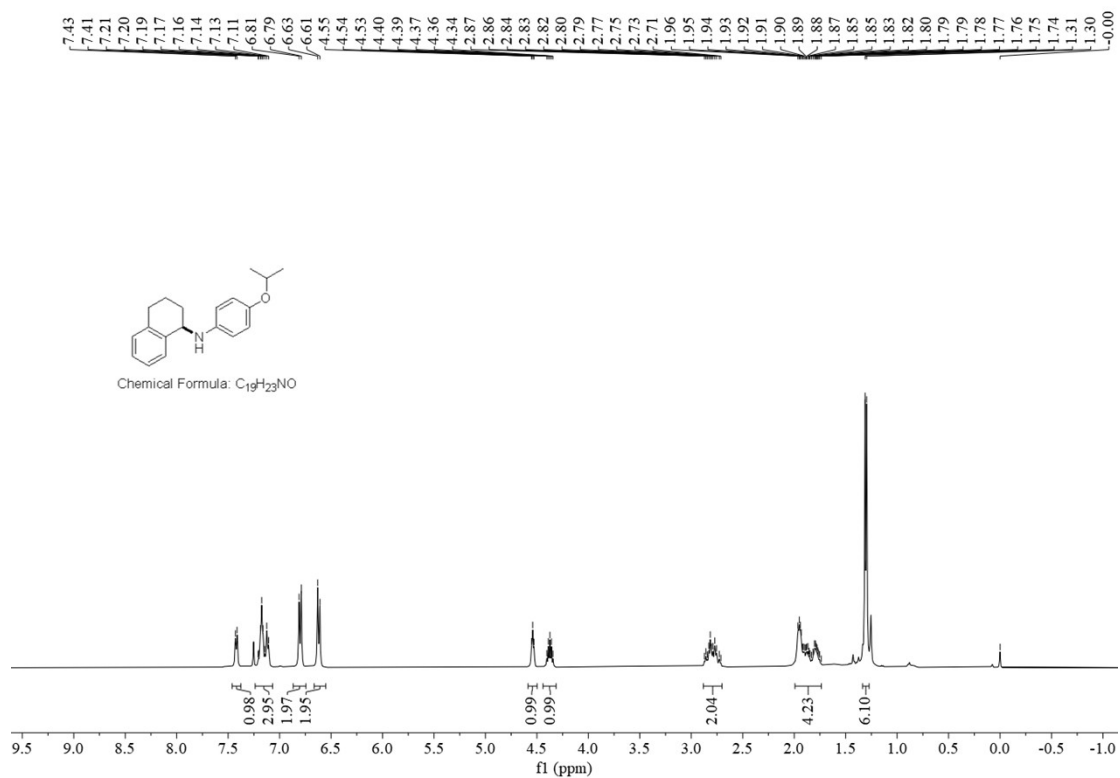

$^1H$  NMR Spectrum of **4ga** in  $CDCl_3$  at 400 MHz

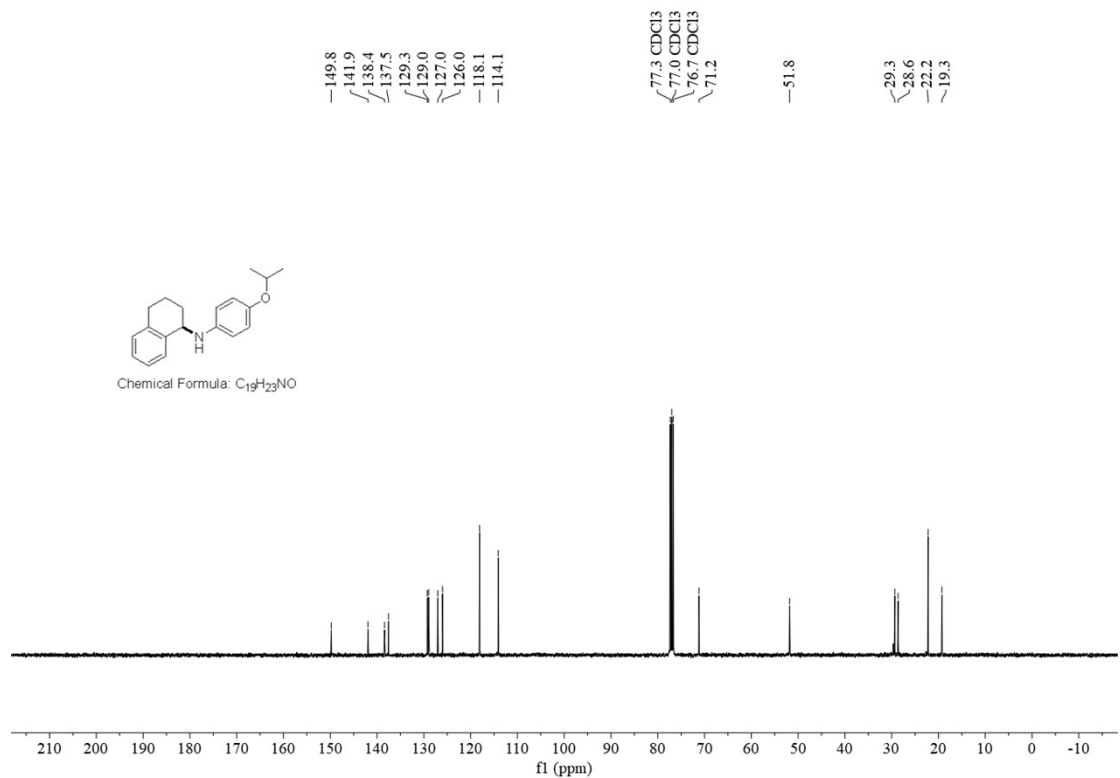

$^{13}C\{^1H\}$  NMR Spectrum of **4ga** in  $CDCl_3$  at 100 MHz

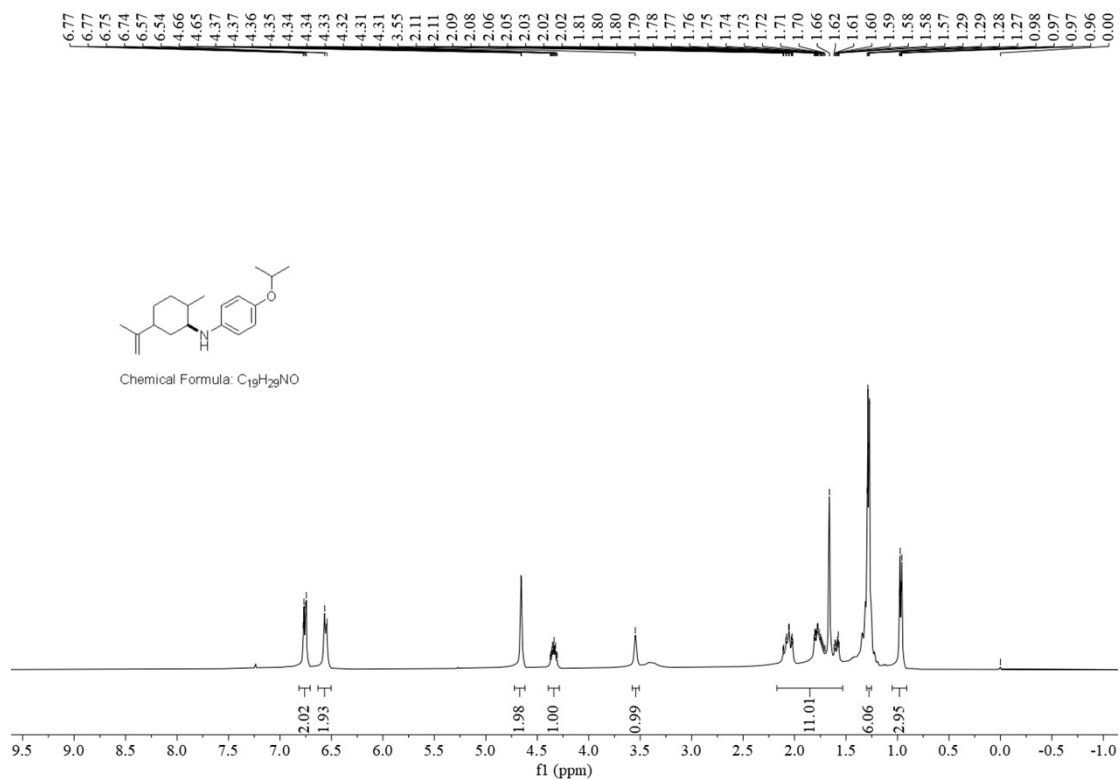

<sup>1</sup>H NMR Spectrum of **4ha** in CDCl<sub>3</sub> at 400 MHz

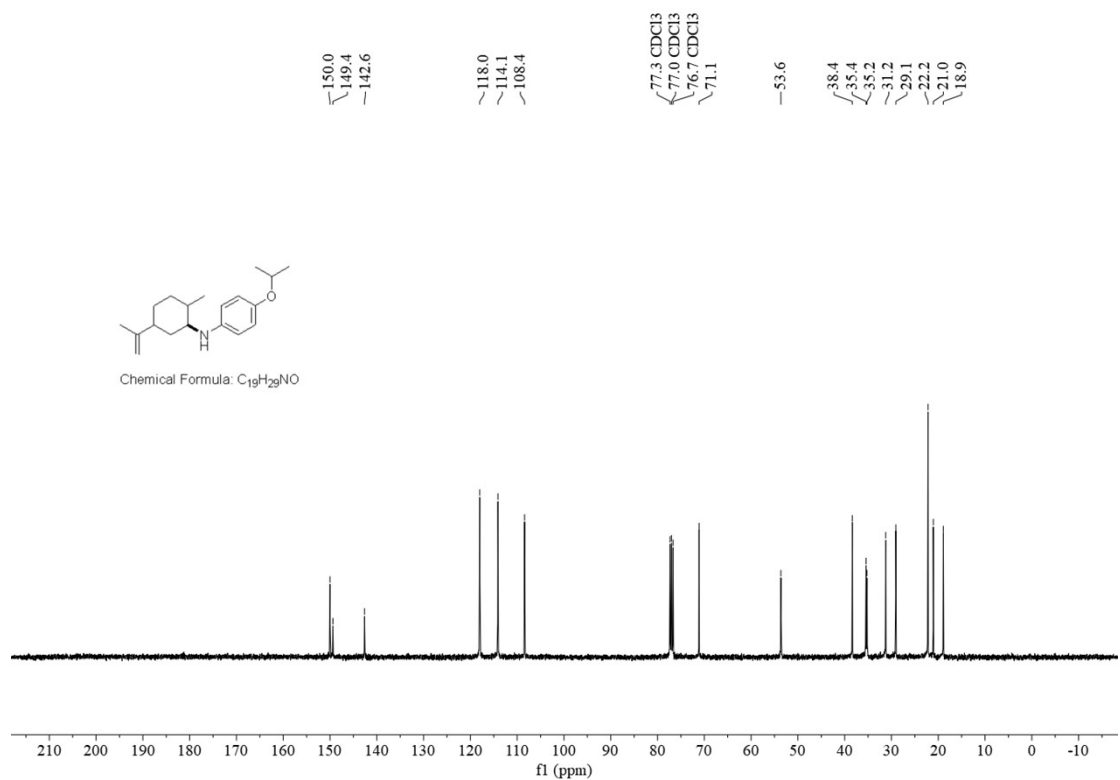

<sup>13</sup>C {<sup>1</sup>H} NMR Spectrum of **4ha** in CDCl<sub>3</sub> at 100 MHz

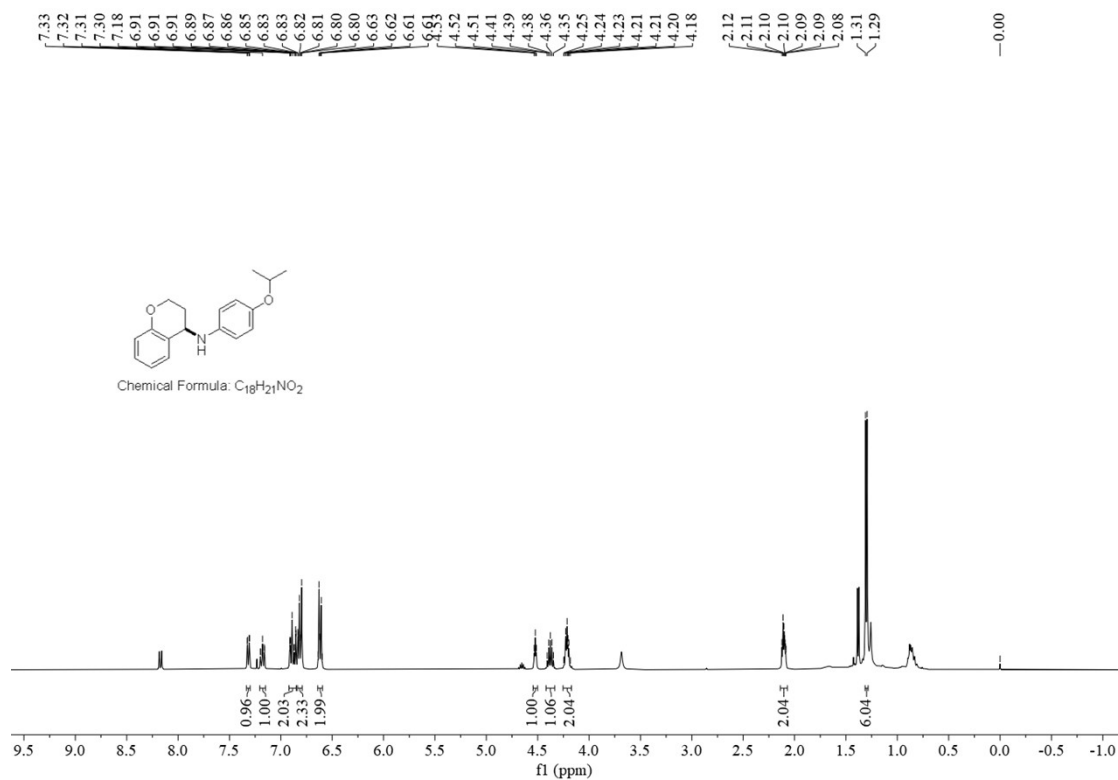

$^1H$  NMR Spectrum of **4ia** in  $CDCl_3$  at 400 MHz

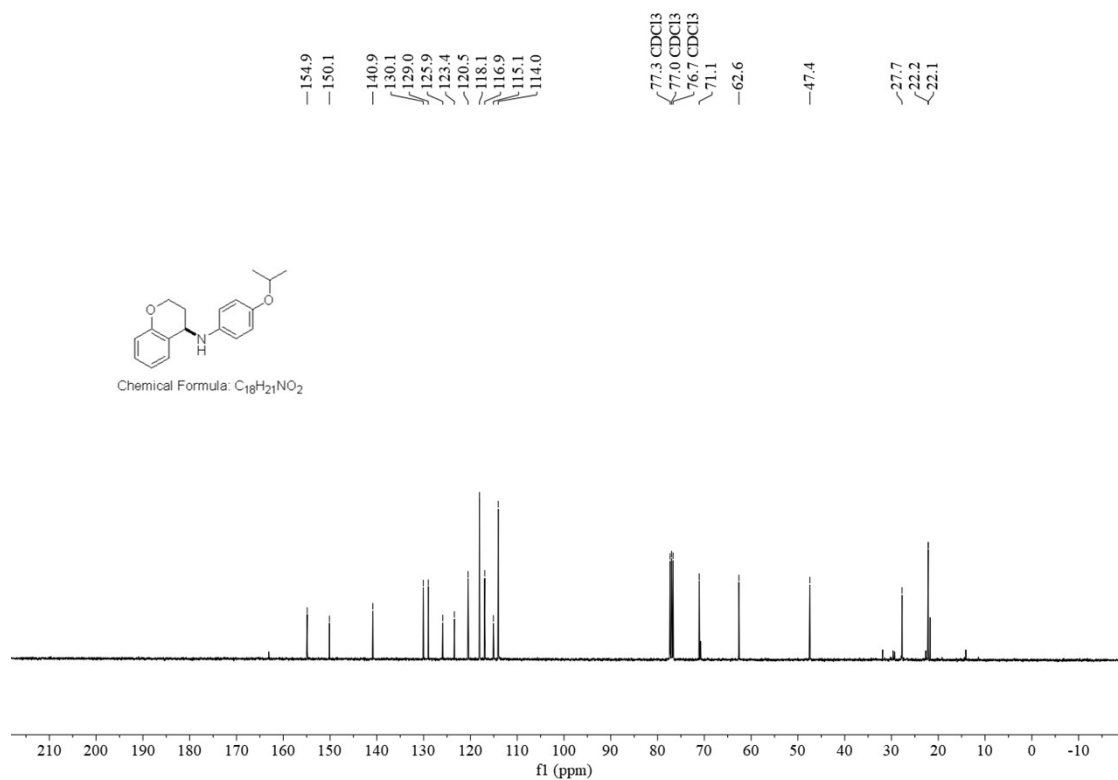

$^{13}C\{^1H\}$  NMR Spectrum of **4ia** in  $CDCl_3$  at 100 MHz

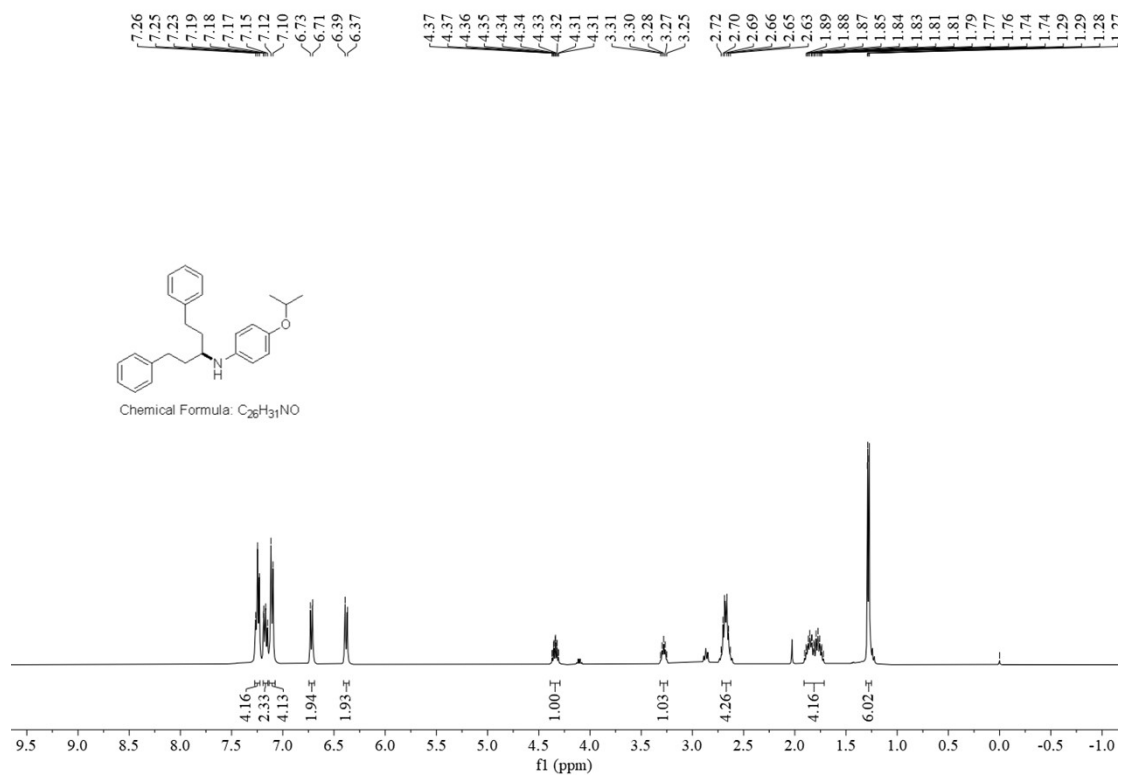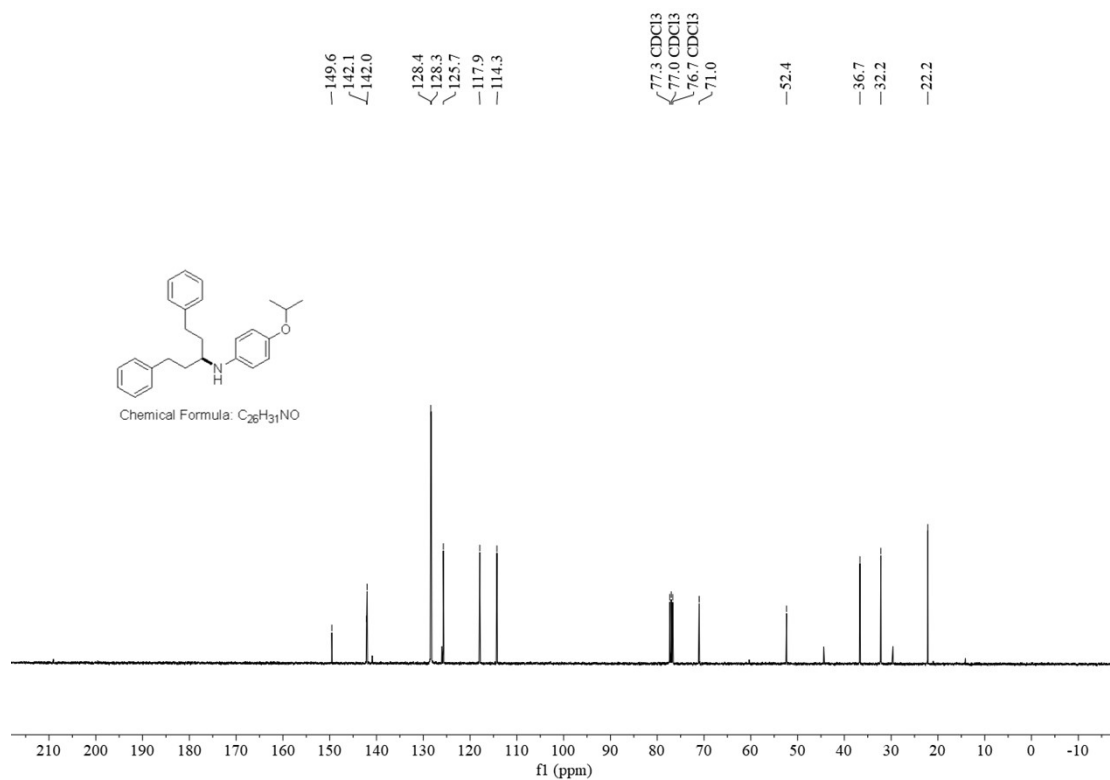

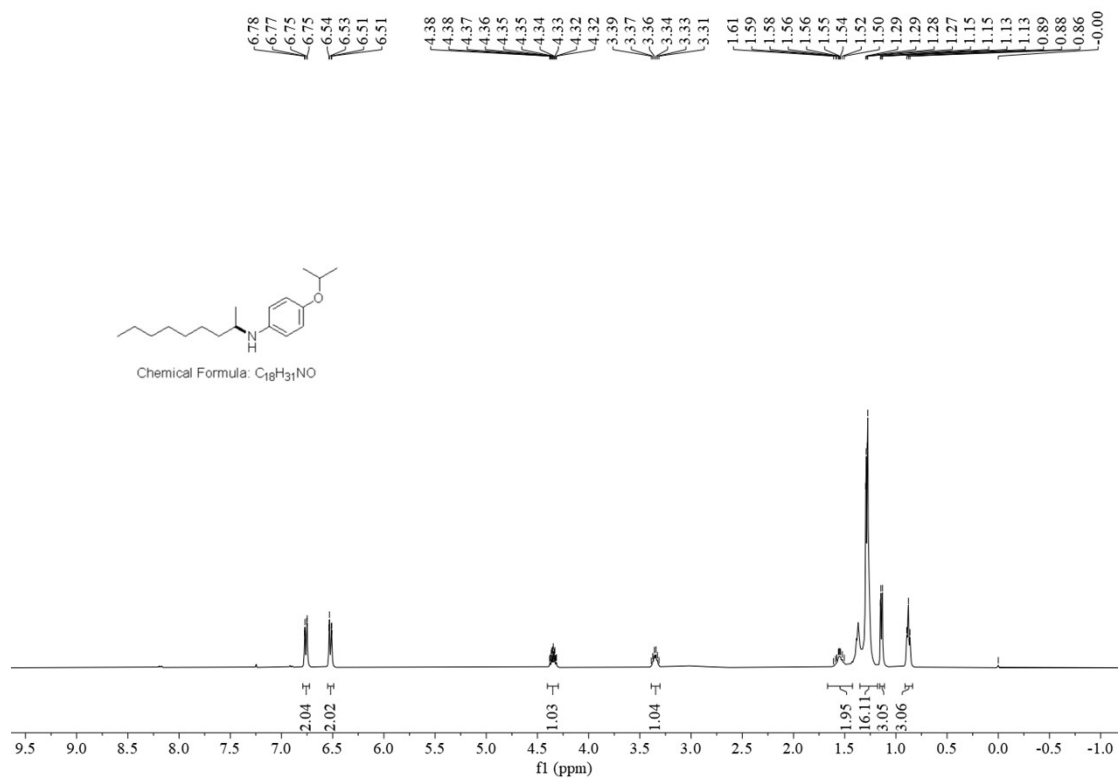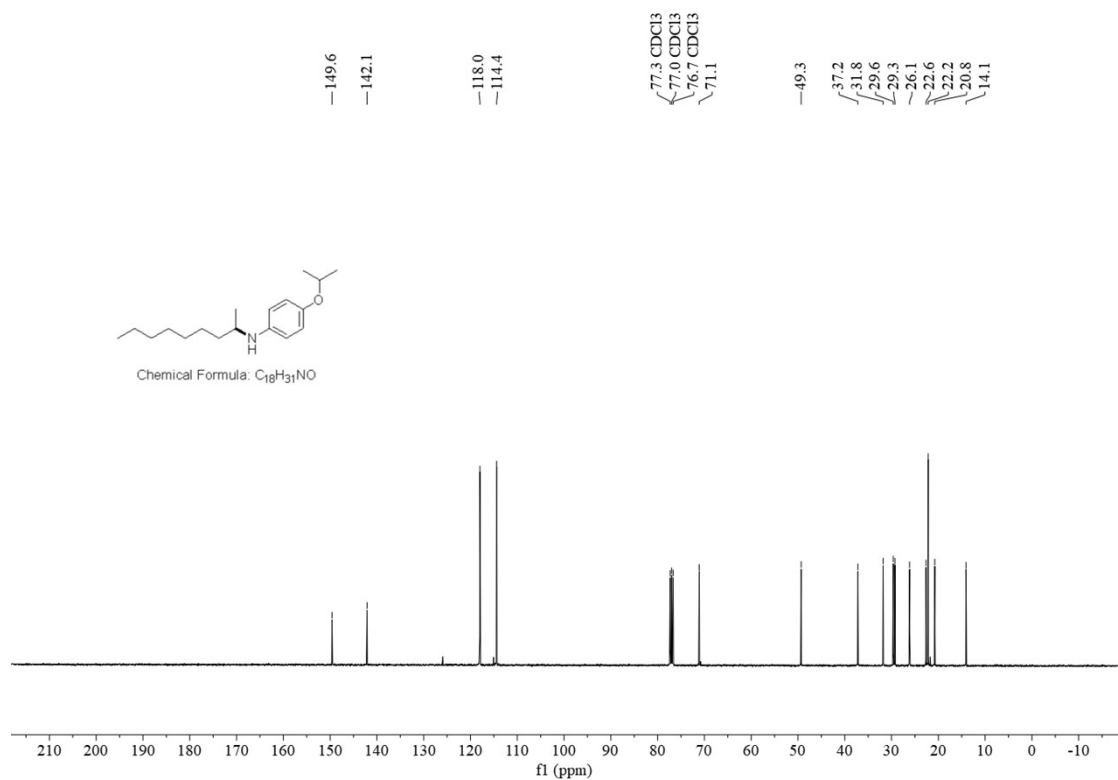



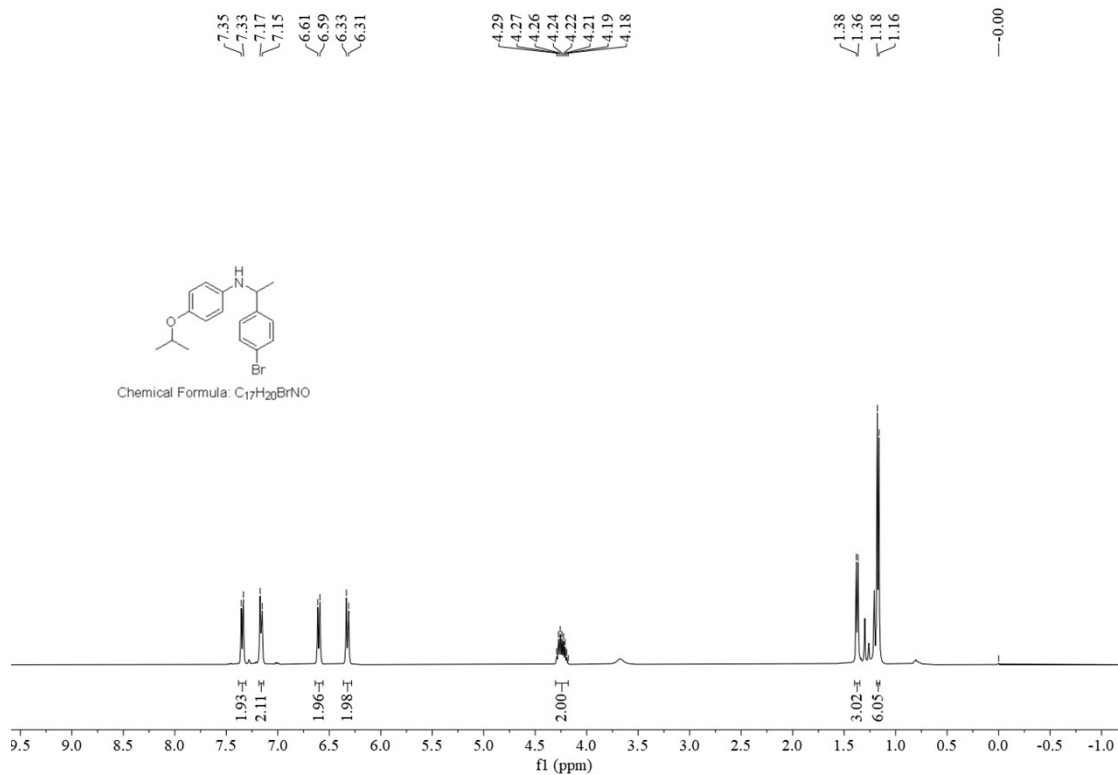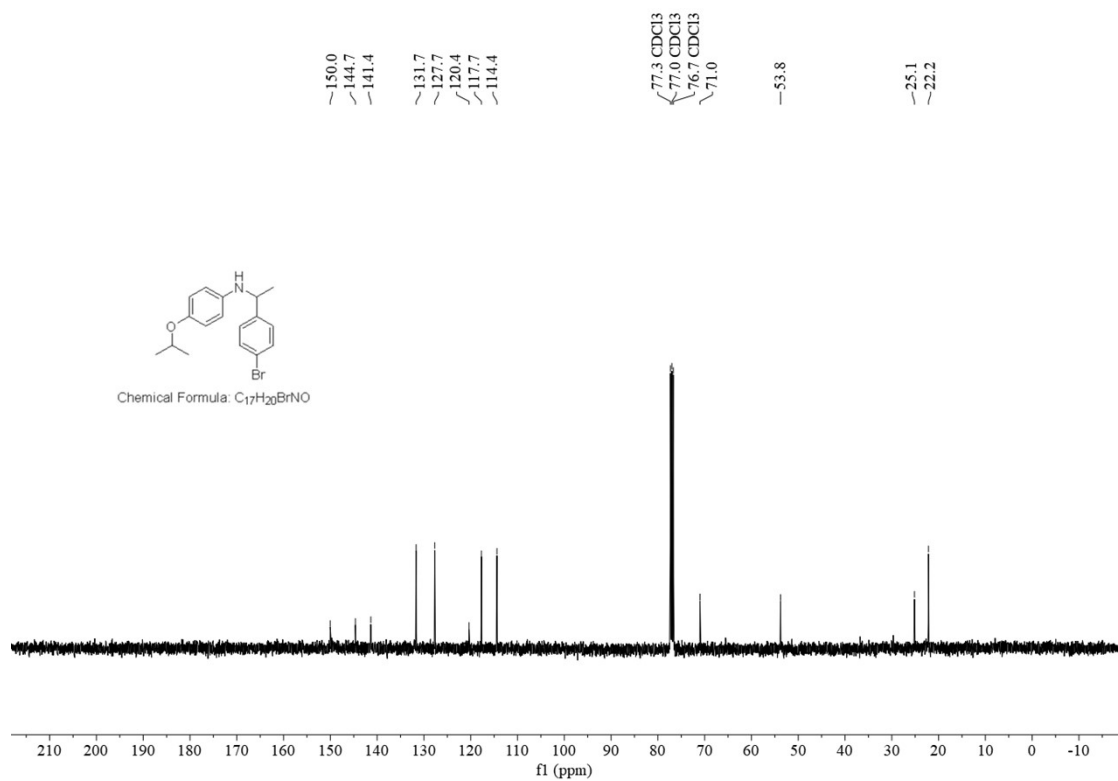

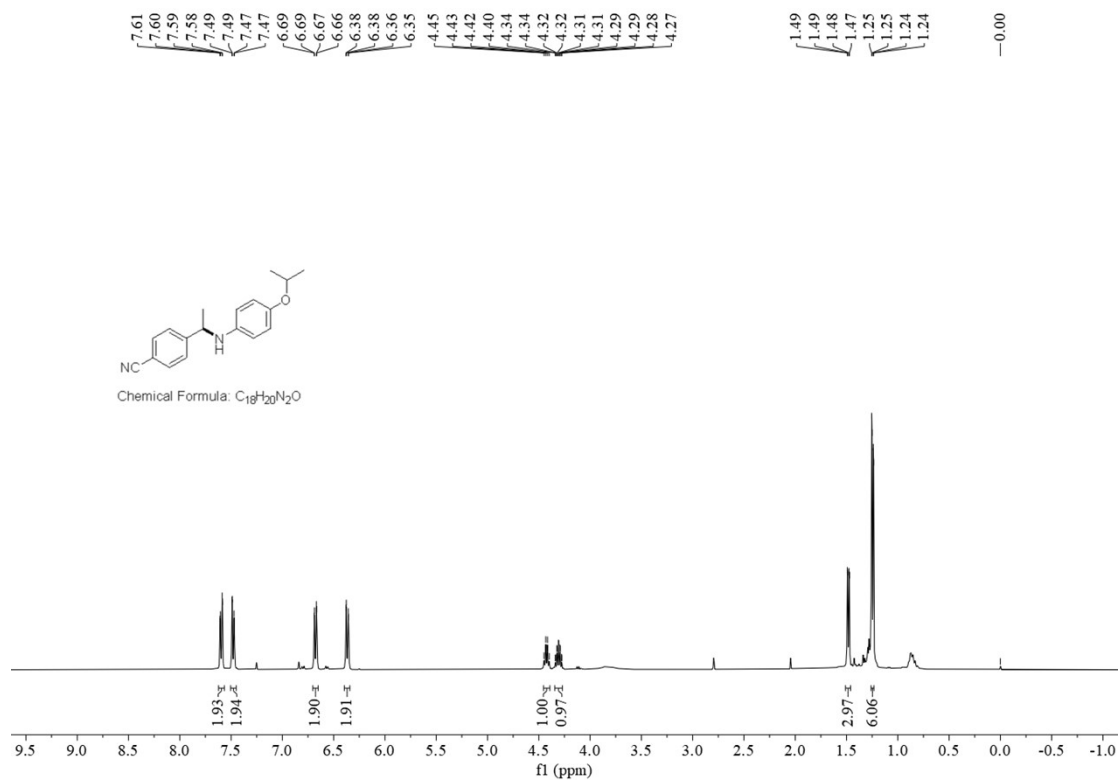

<sup>1</sup>H NMR Spectrum of **4ma** in CDCl<sub>3</sub> at 400 MHz

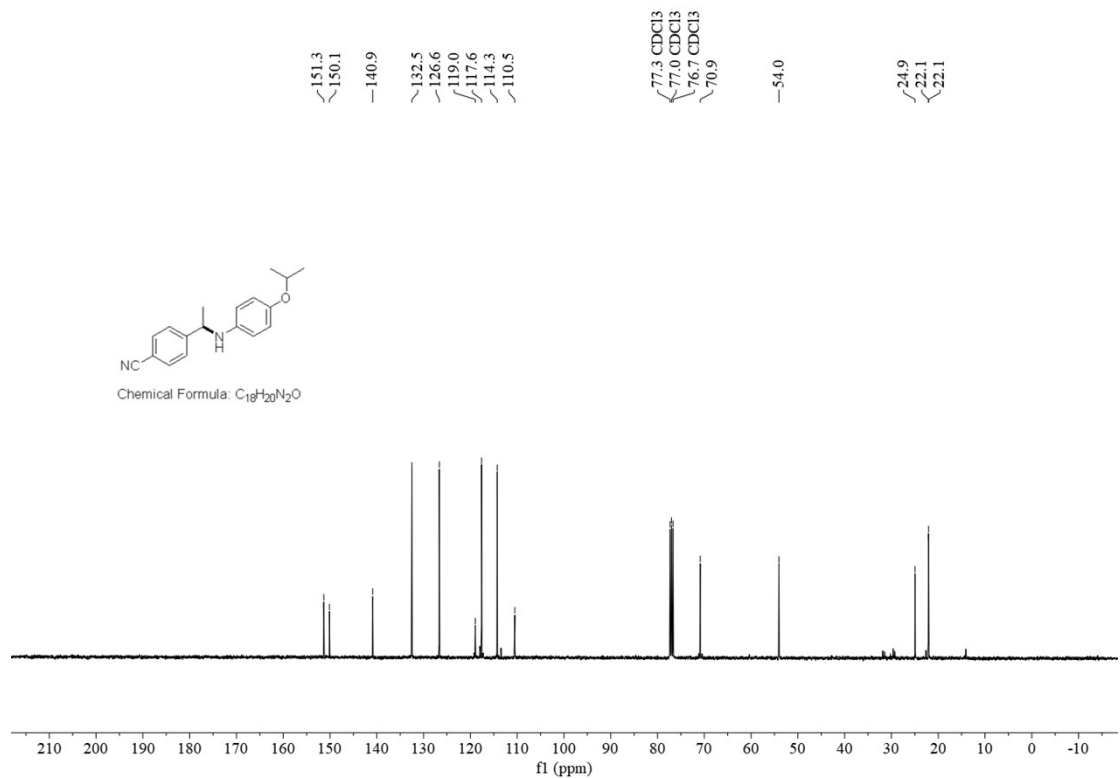

<sup>13</sup>C{<sup>1</sup>H} NMR Spectrum of **4ma** in CDCl<sub>3</sub> at 100 MHz

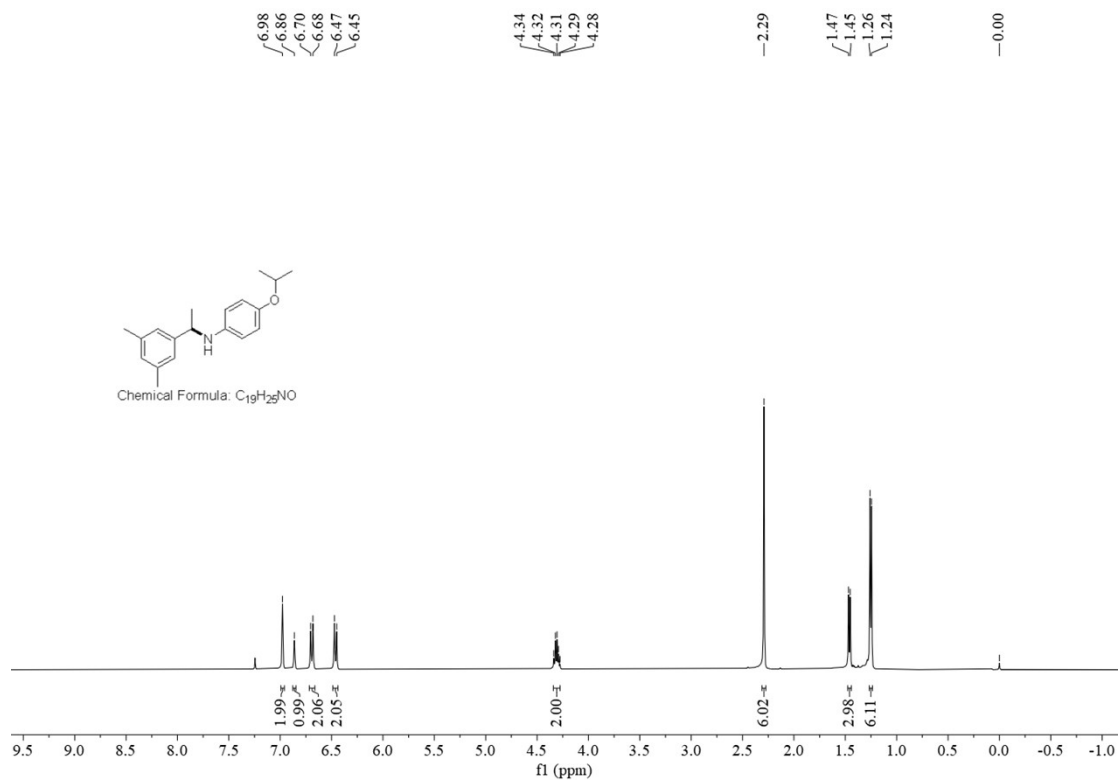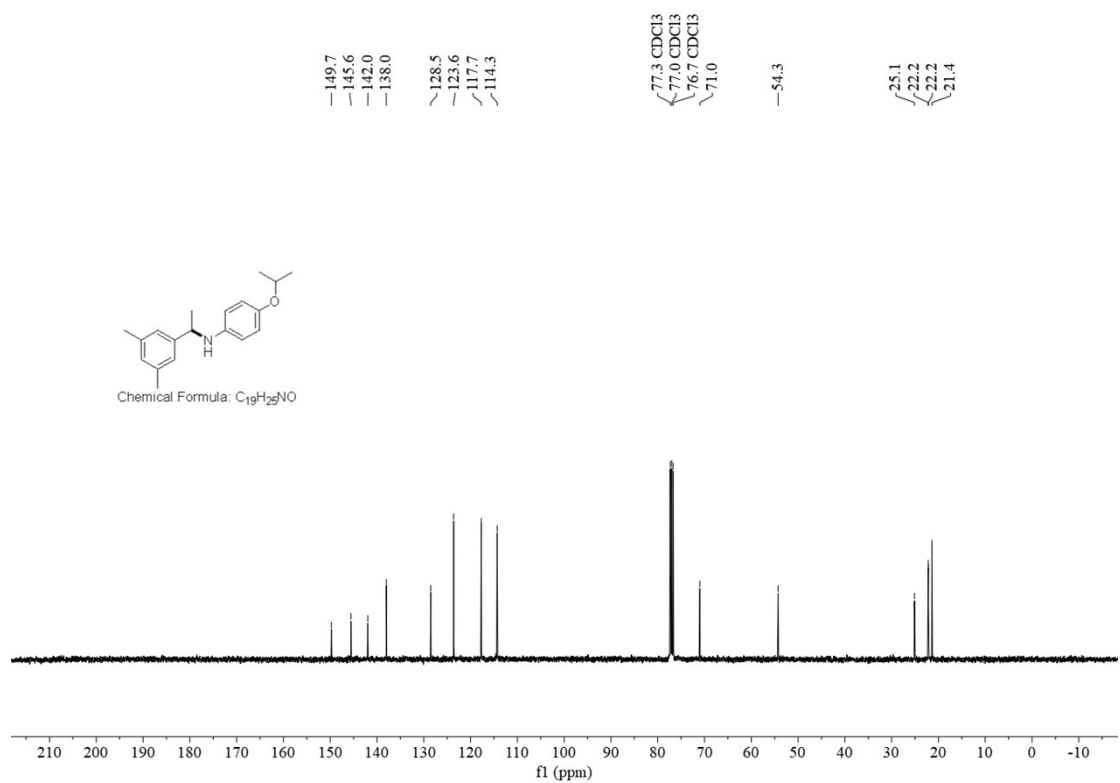

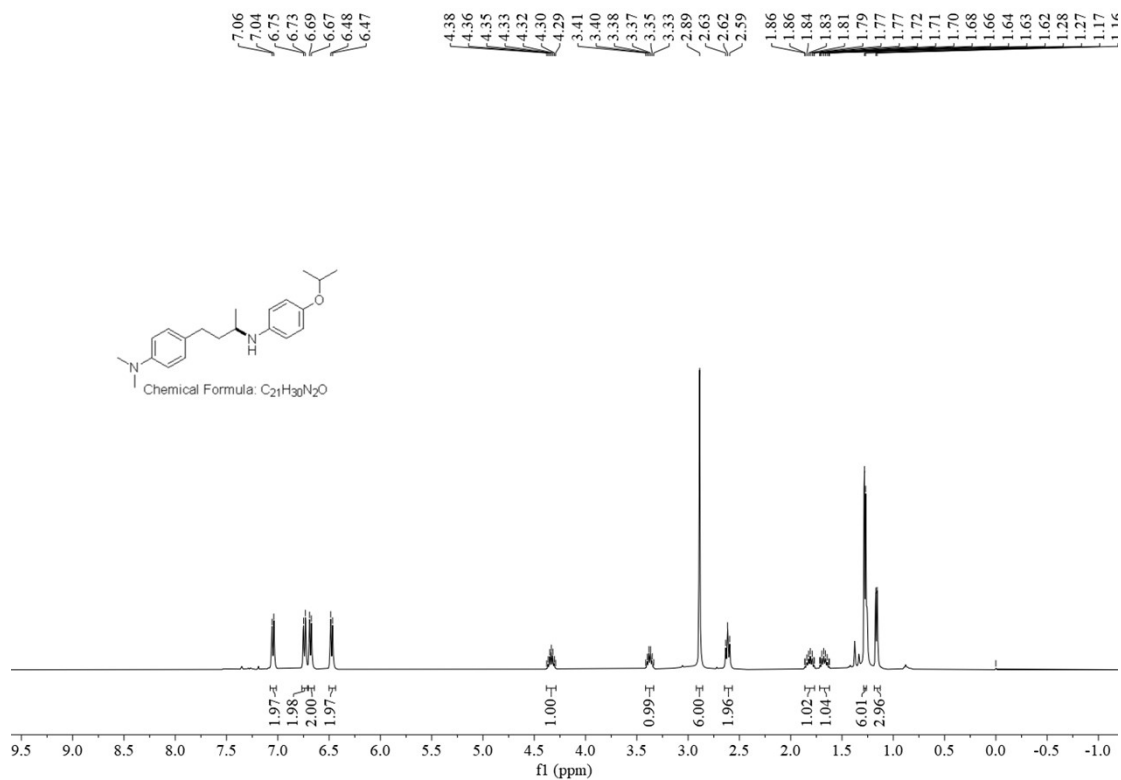

$^1H$  NMR Spectrum of **40a** in  $CDCl_3$  at 400 MHz

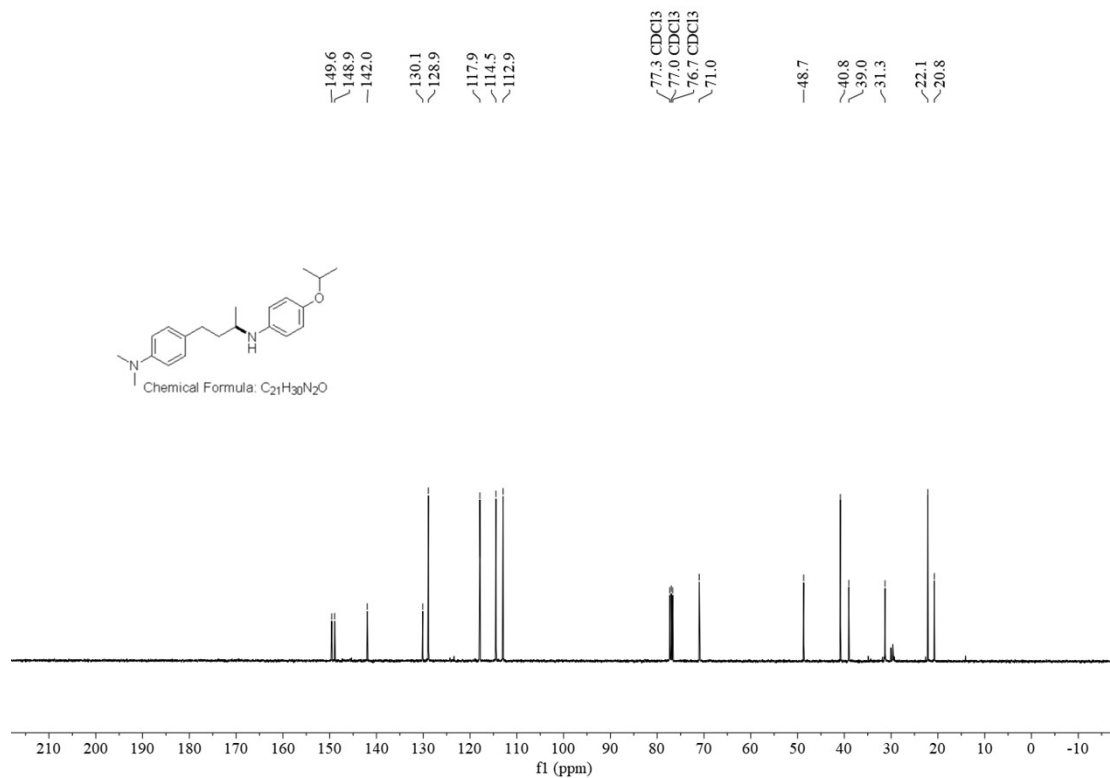

$^{13}C\{^1H\}$  NMR Spectrum of **40a** in  $CDCl_3$  at 100 MHz

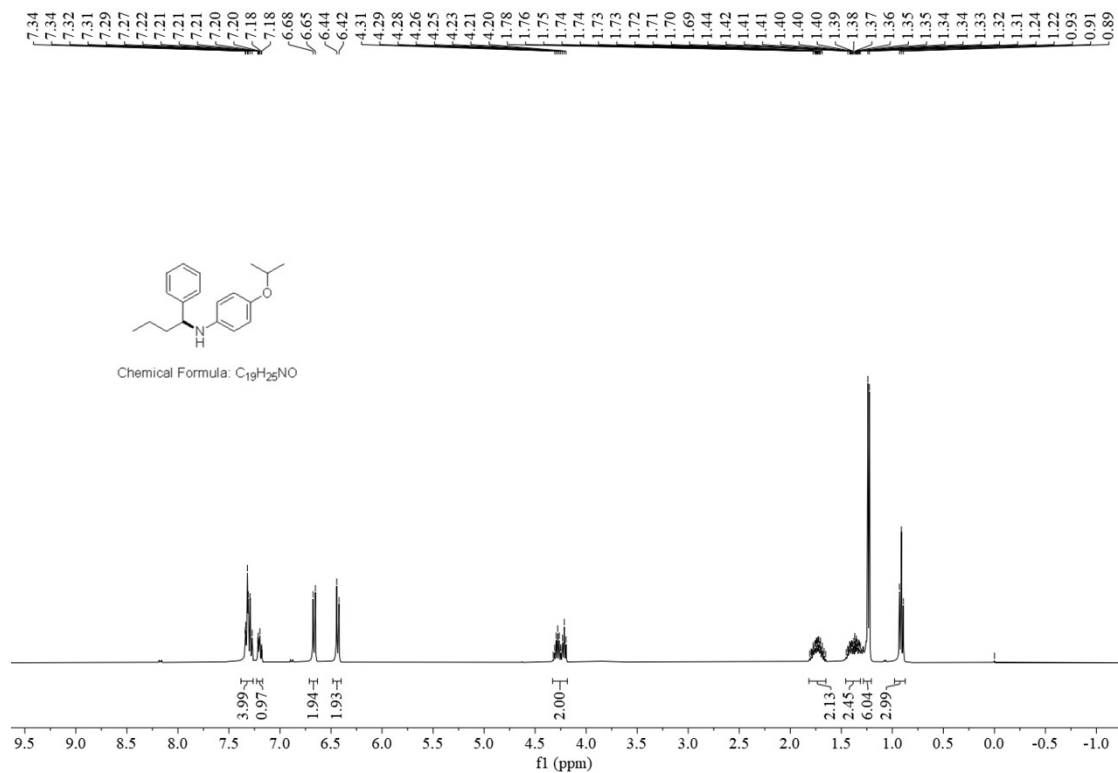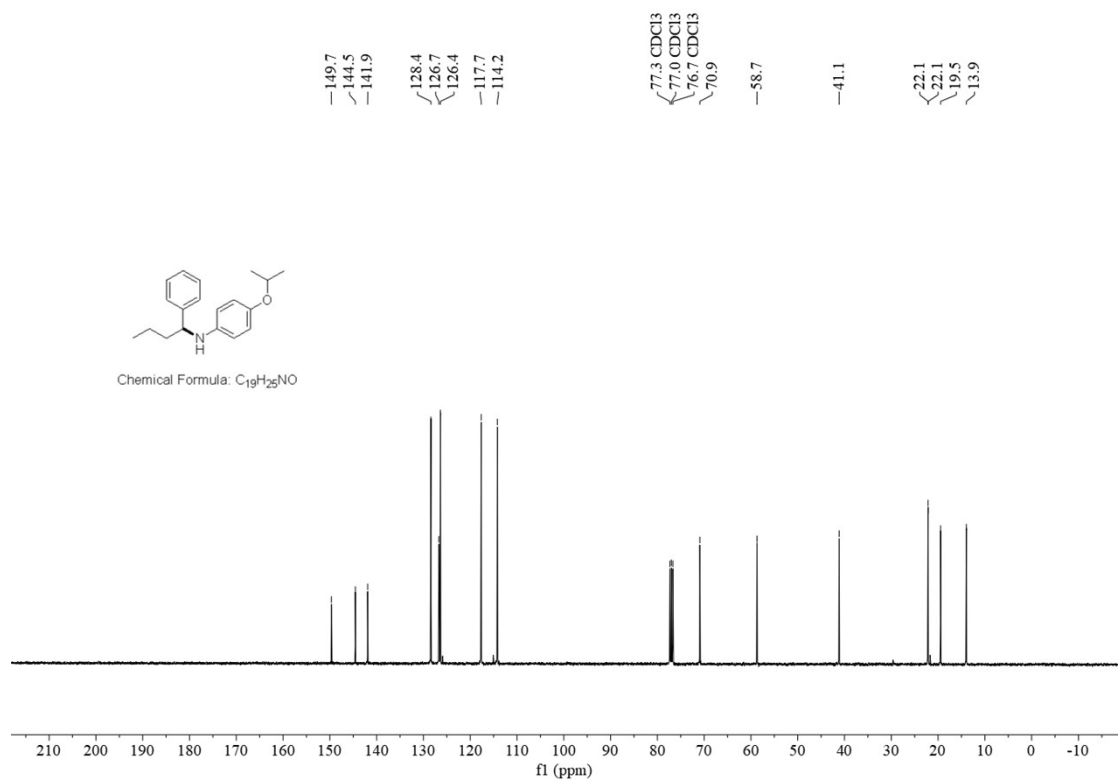

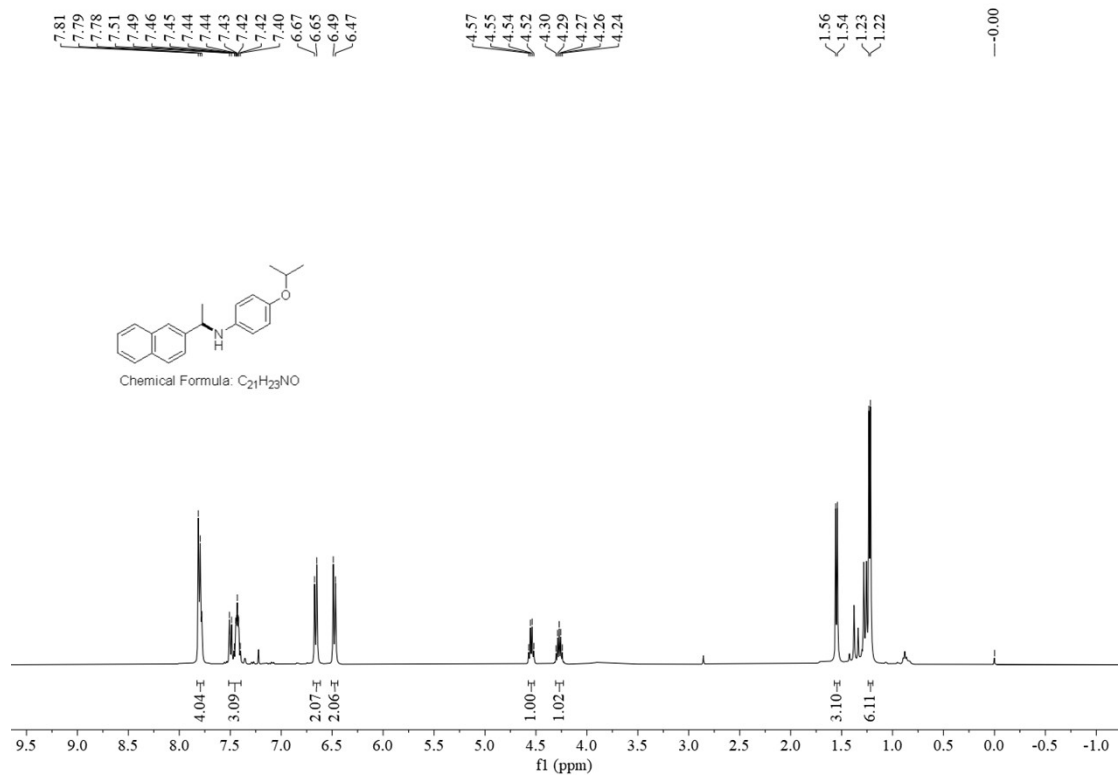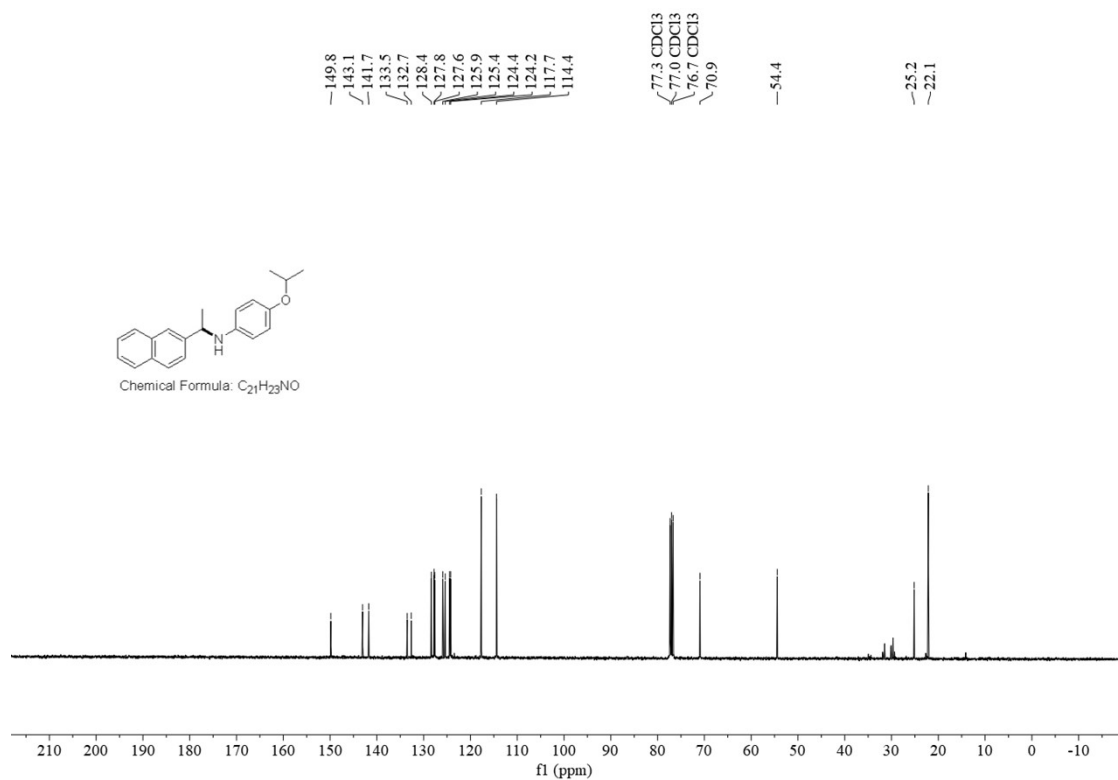

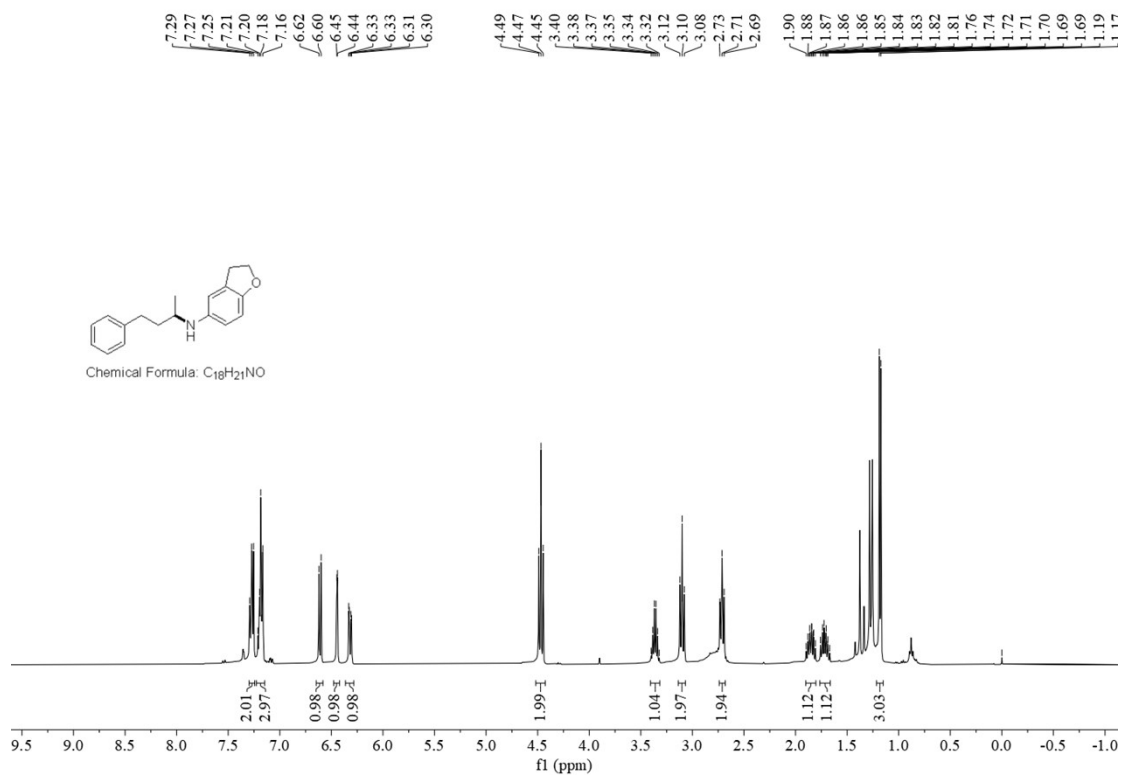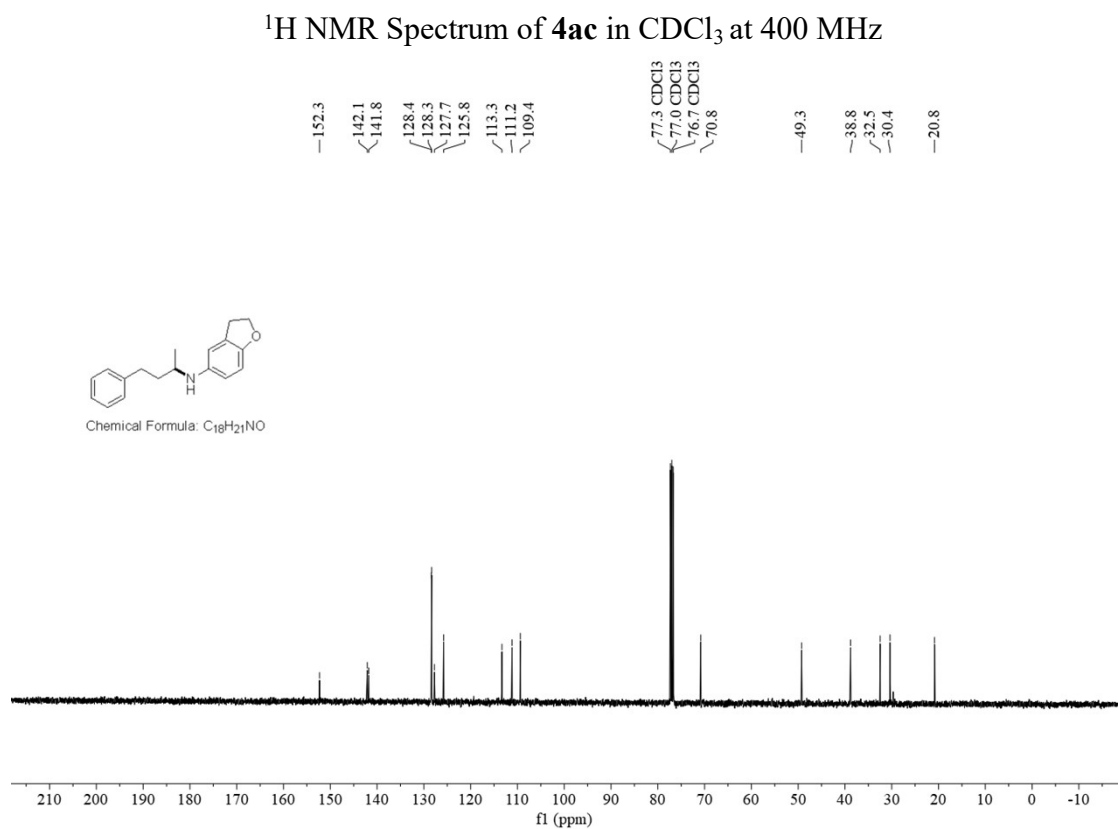

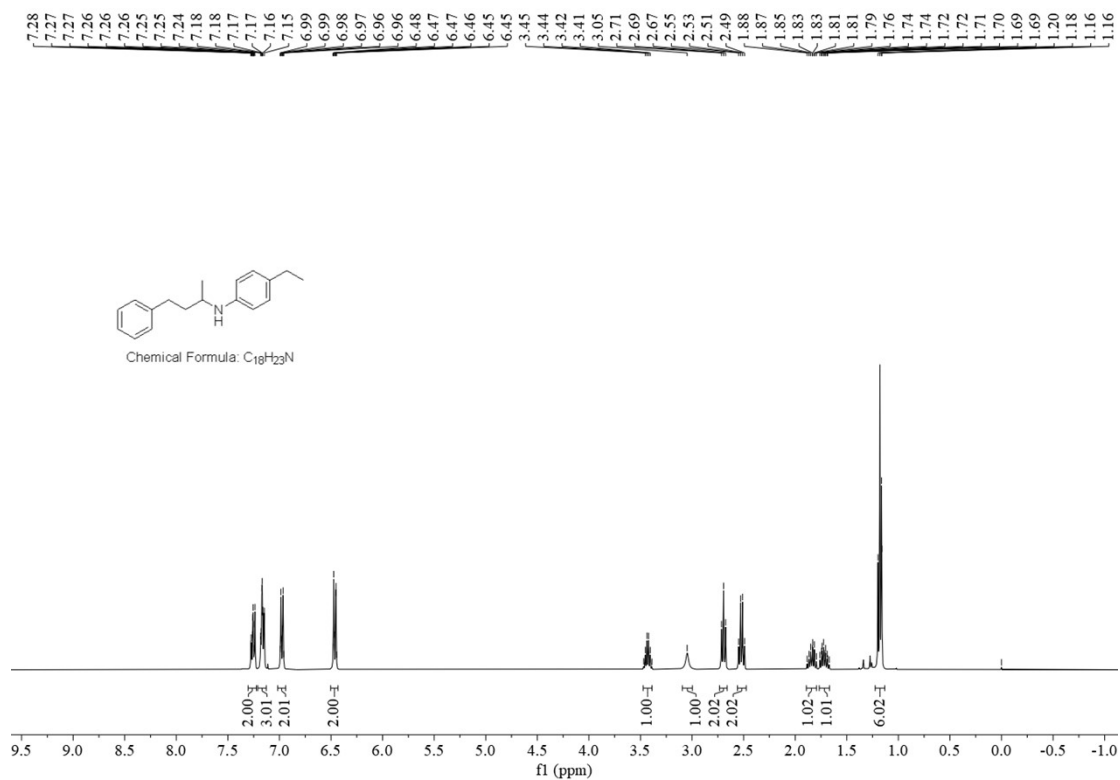

<sup>1</sup>H NMR Spectrum of **4ad** in CDCl<sub>3</sub> at 400 MHz

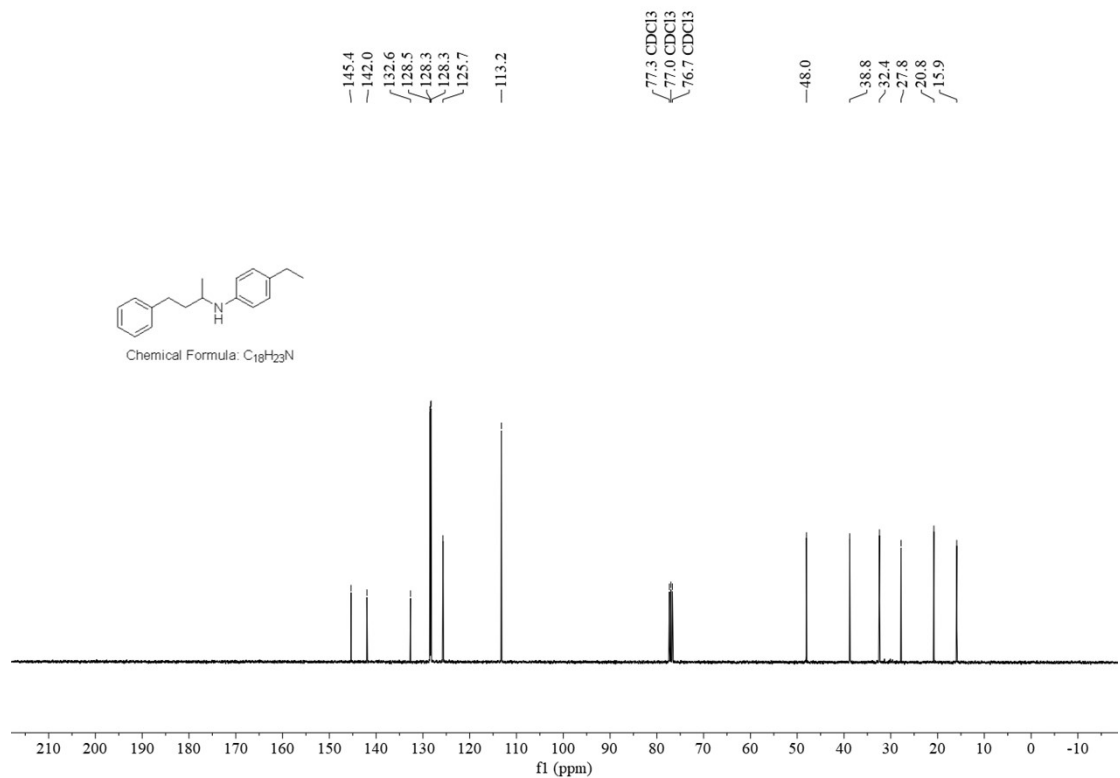

<sup>13</sup>C{<sup>1</sup>H} NMR Spectrum of **4ad** in CDCl<sub>3</sub> at 100 MHz



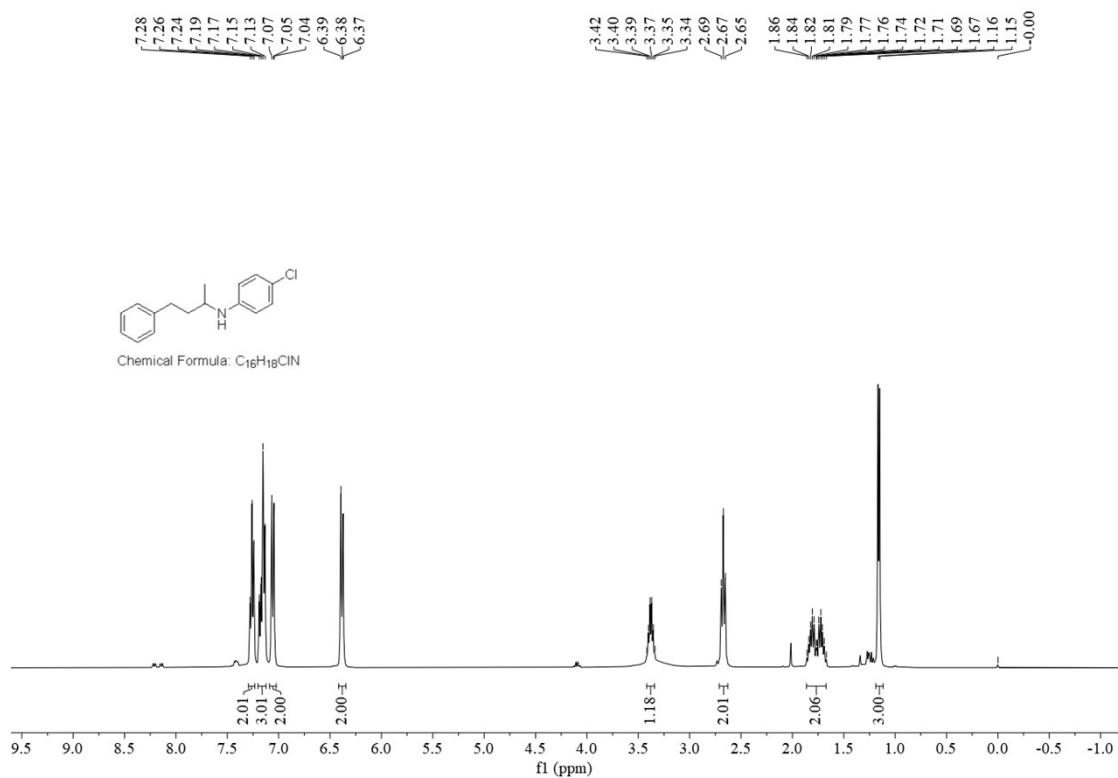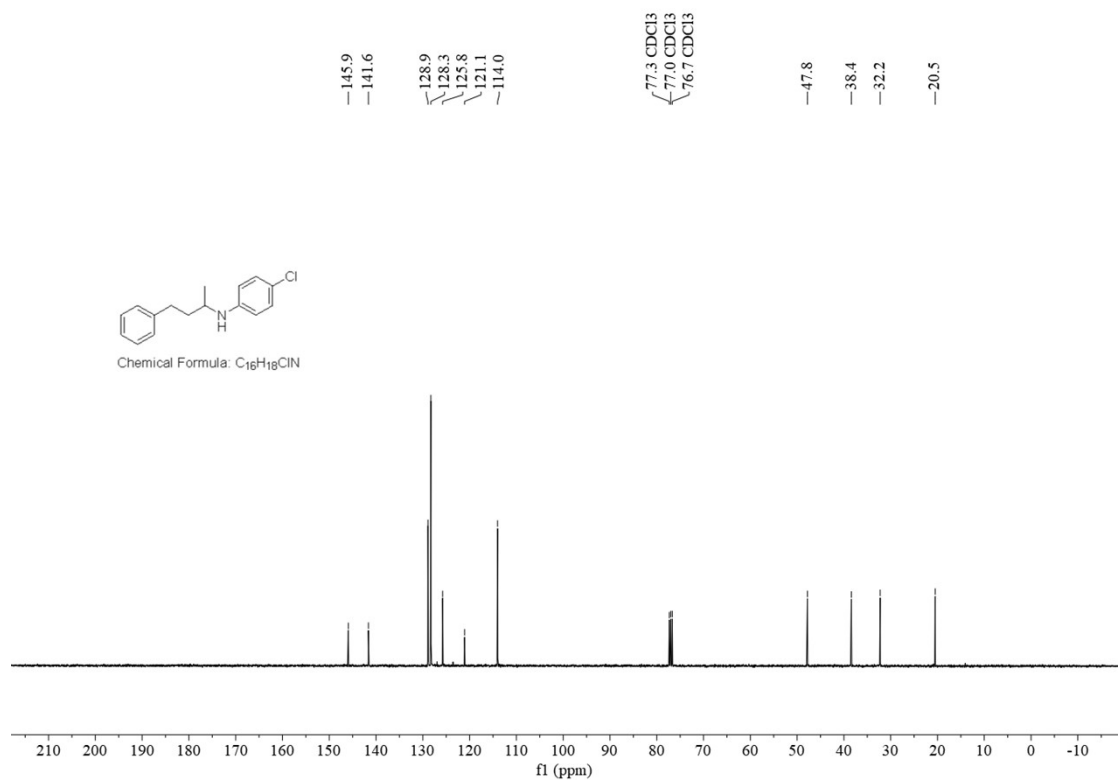

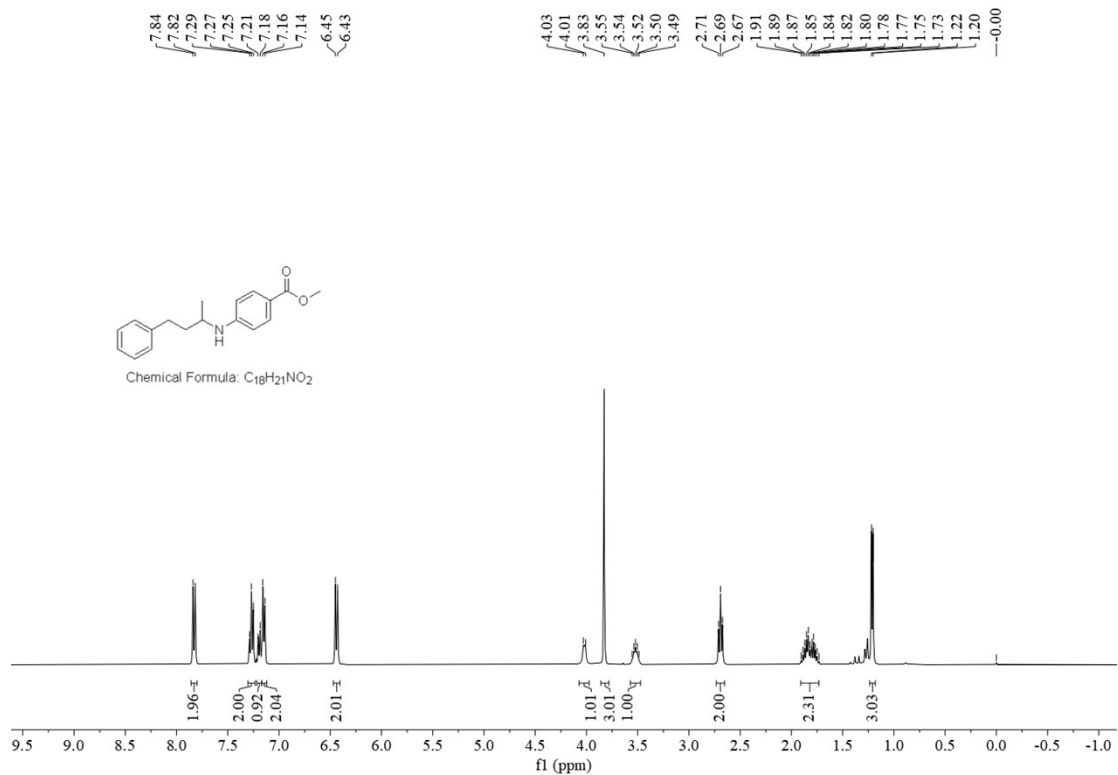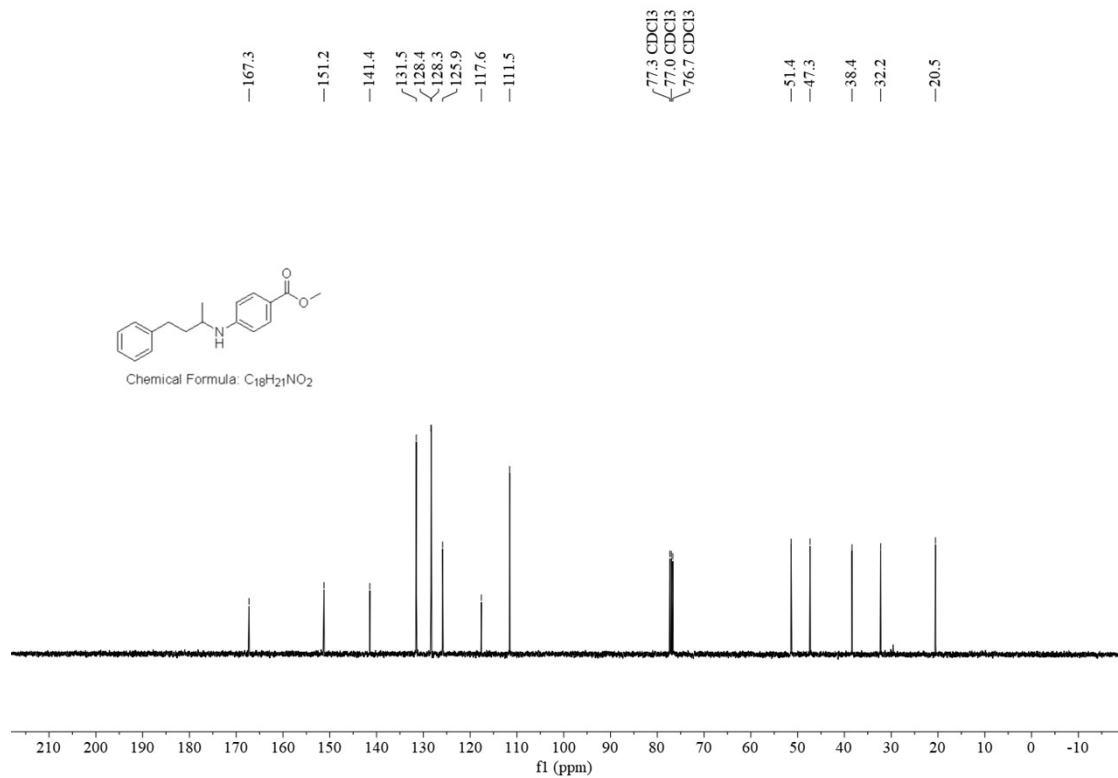

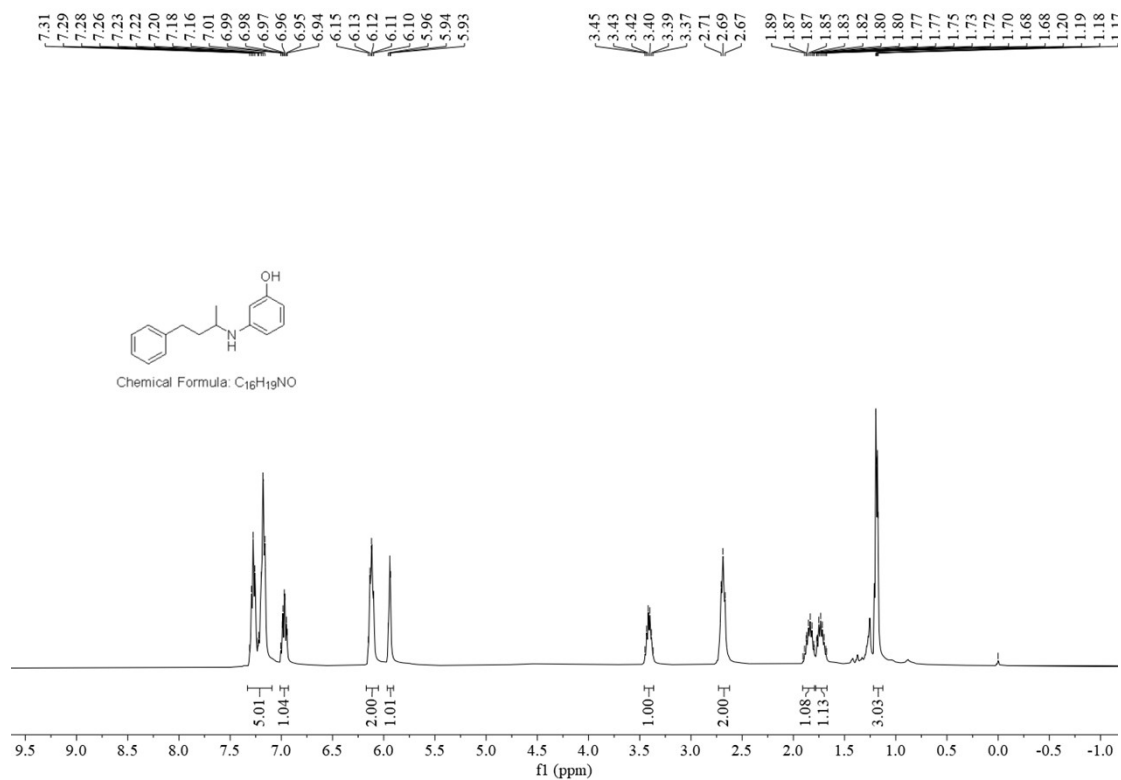

<sup>1</sup>H NMR Spectrum of **4ag** in CDCl<sub>3</sub> at 400 MHz

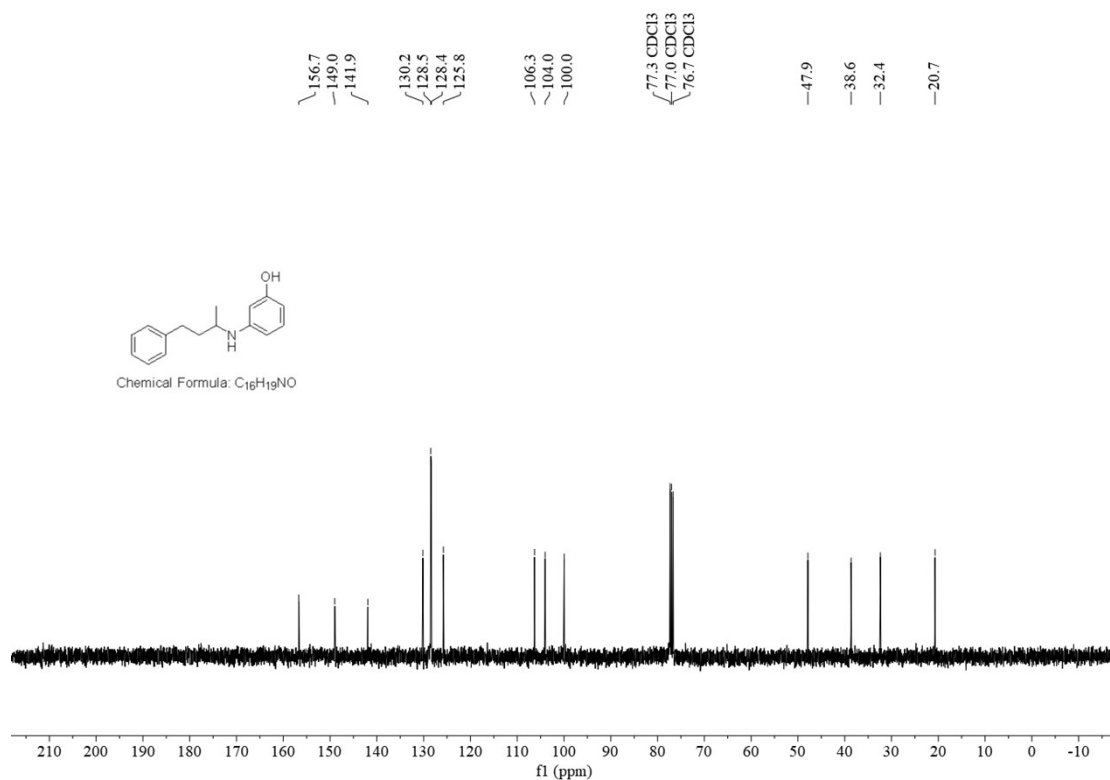

<sup>13</sup>C{<sup>1</sup>H} NMR Spectrum of **4ag** in CDCl<sub>3</sub> at 100 MHz

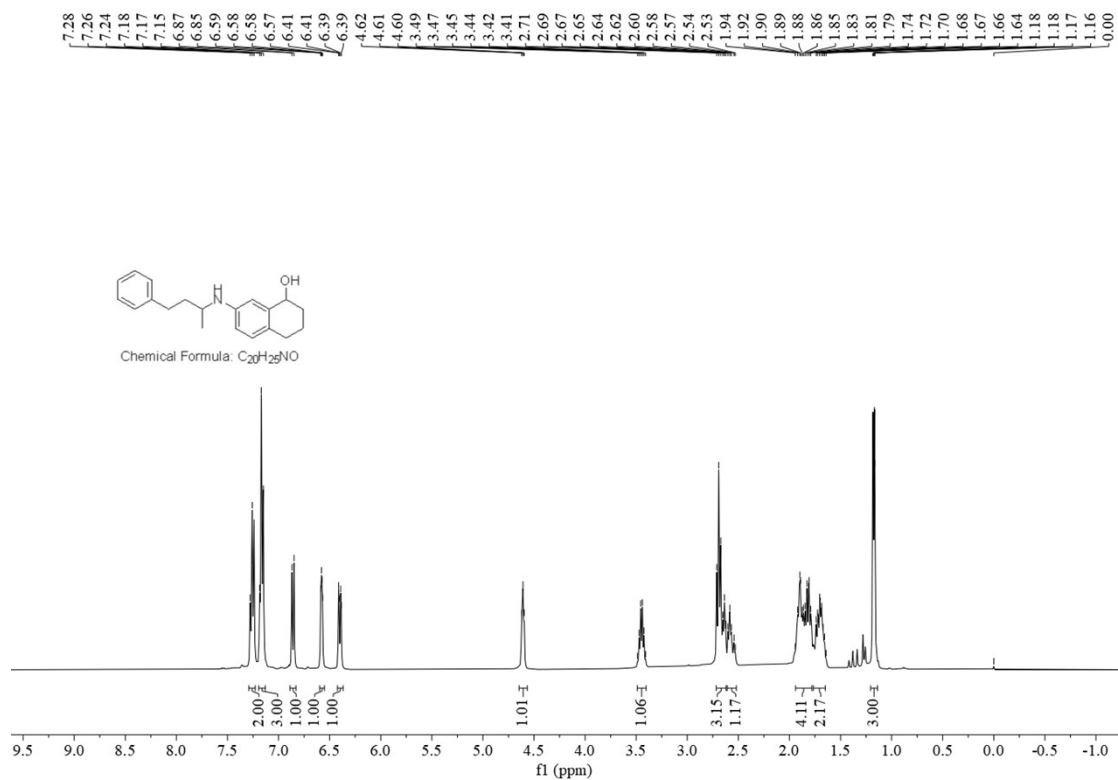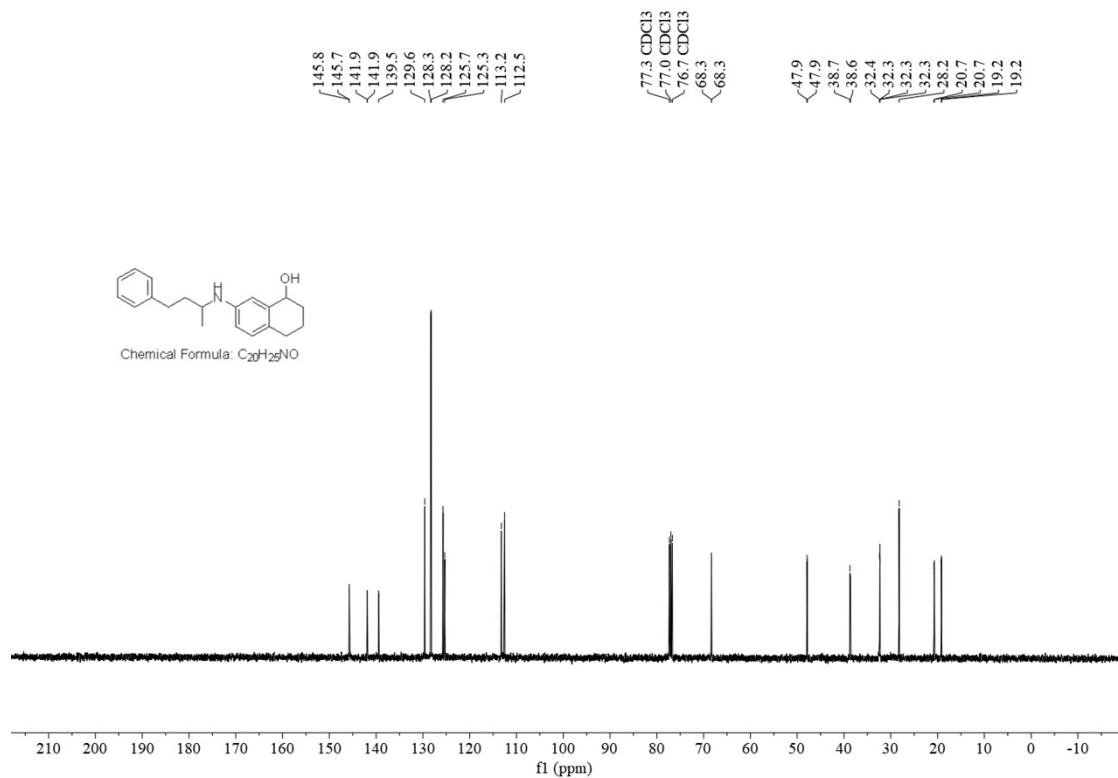

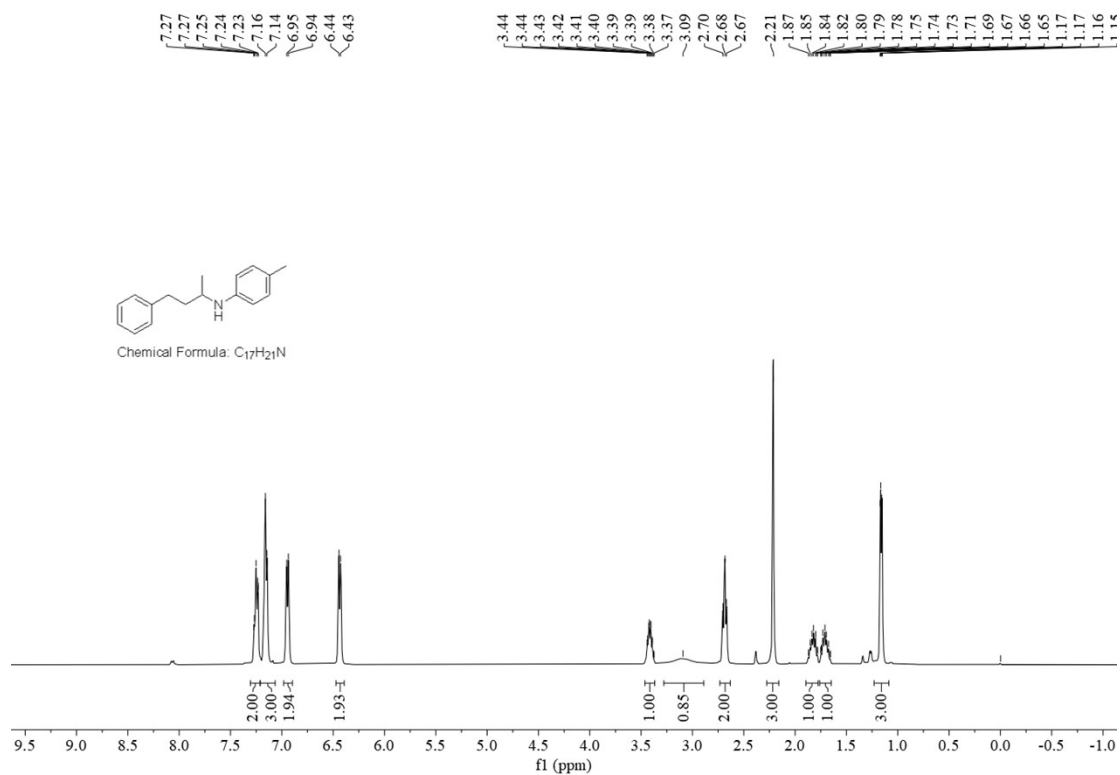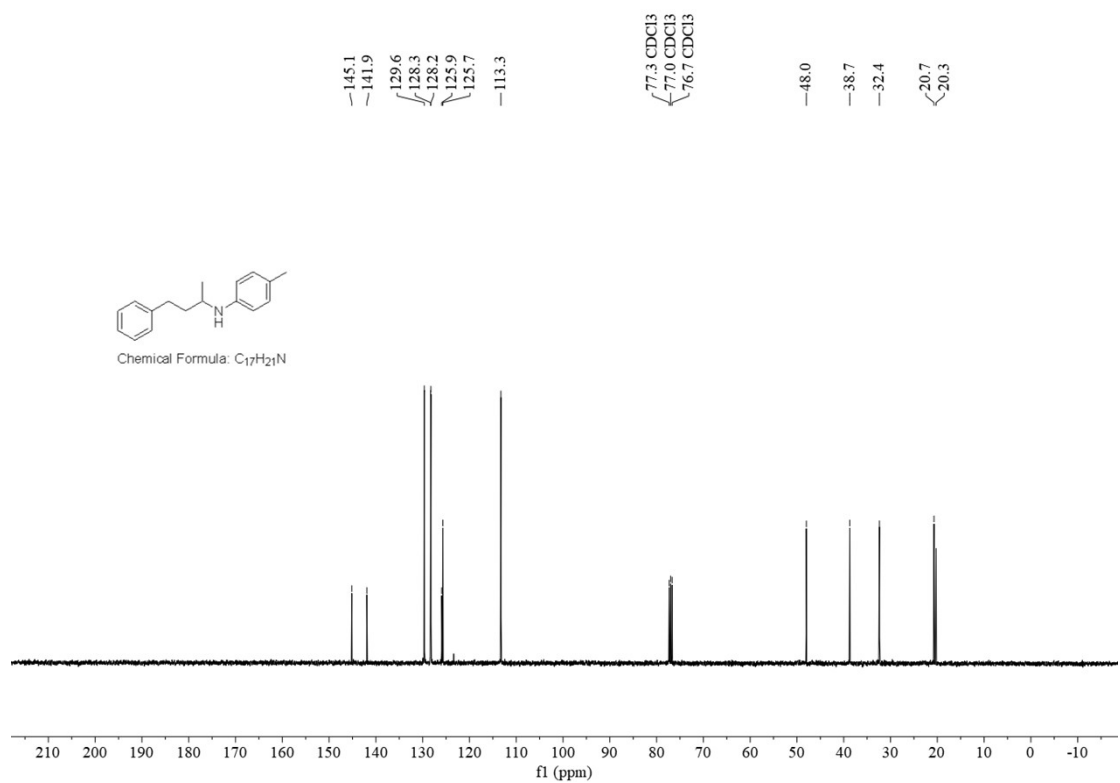

## J. HPLC spectra

### Racemic product of 4-isopropoxy-*N*-(4-phenylbutan-2-yl)aniline (4aa)

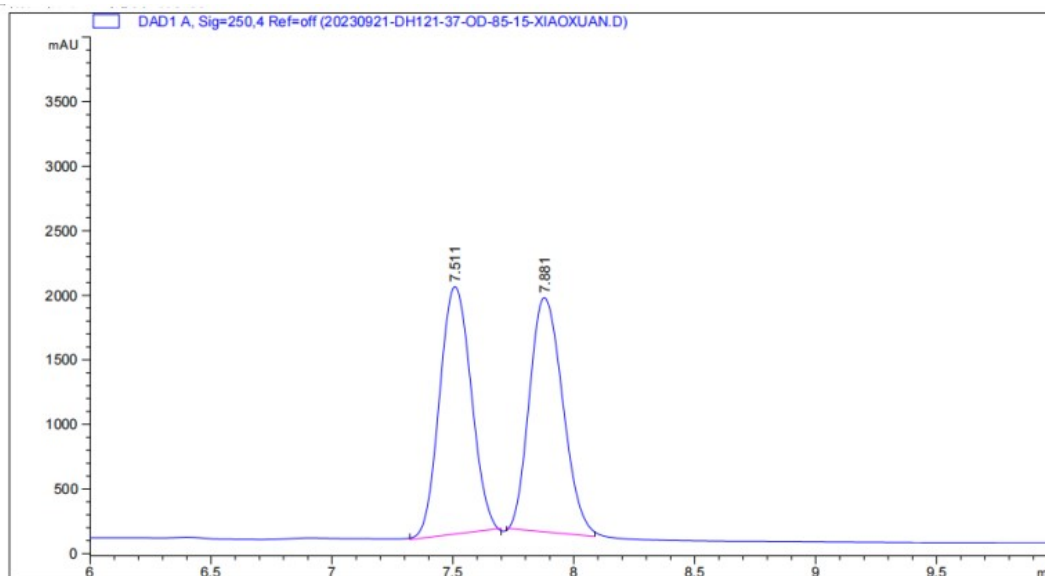

| Peak # | RetTime [min] | Type | Width [min] | Area [mAu*s] | Height [mAu] | Area %  |
|--------|---------------|------|-------------|--------------|--------------|---------|
| 1      | 7.511         | MM R | 0.1509      | 1.73659e4    | 1918.45862   | 49.9851 |
| 2      | 7.881         | MM R | 0.1595      | 1.73762e4    | 1816.04834   | 50.0149 |

### Chiral product of 4-isopropoxy-*N*-(4-phenylbutan-2-yl)aniline (4aa)

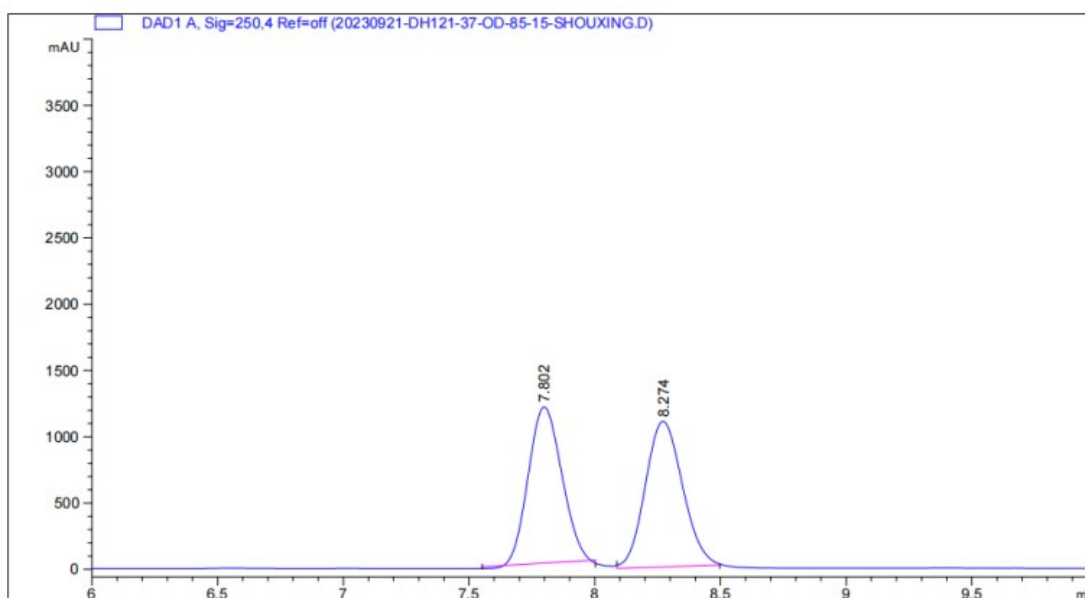

| Peak # | RetTime [min] | Type | Width [min] | Area [mAu*s] | Height [mAu] | Area %  |
|--------|---------------|------|-------------|--------------|--------------|---------|
| 1      | 7.802         | MM R | 0.1538      | 1.08774e4    | 1178.90771   | 49.0168 |
| 2      | 8.274         | MM R | 0.1715      | 1.13137e4    | 1099.60254   | 50.9832 |
